# Supplementary material
Source: publisher figshare collection journal article supplement (https://acs.figshare.com/ndownloader/files/4554958)
Supplement: Supplementary file 1 [file 4554958]

## Supplemental Information

### **Discovery of inducible Nitric Oxide Synthase (iNOS) inhibitor Development Candidate KD7332 (Part 1): Identification of a Novel, Potent and Selective series of Quinolinone iNOS Dimerization Inhibitors that are Orally Active in Rodent Pain Models**

*Céline Bonnefous<sup>1</sup>, Joseph E. Payne<sup>1</sup>, Jeffrey Roppe<sup>1</sup>, Hui Zhang<sup>1</sup>, Xiaohong Chen<sup>1</sup>, Kent T. Symons<sup>2</sup>, Phan M. Nguyen<sup>2</sup>, Marciano Sablad<sup>3</sup>, Natasha Rozenkrants<sup>3</sup>, Yan Zhang<sup>3</sup>, Li Wang<sup>4</sup>, Daniel Severance<sup>1</sup>, John P. Walsh<sup>5</sup>, Nahid Yazdani<sup>5</sup>, Andrew K. Shiau<sup>2</sup>, Stewart A. Noble<sup>1</sup>, Peter Rix<sup>4</sup>, Tadimeti S. Rao<sup>3</sup>, Christian A. Hassig<sup>2</sup> and Nicholas D. Smith<sup>\*1</sup>*

<sup>1</sup> Department of Chemistry <sup>2</sup> Department of Biology <sup>3</sup> Department of Pharmacology <sup>4</sup>  
Department of Drug Metabolism and Pharmacokinetics <sup>5</sup> Department of Analytical Chemistry

Kalypsys Inc., 10420 Wateridge Circle, San Diego, CA92121

\* To whom correspondence should be addressed. Phone (858) 754-3481. Fax: (858) 754 3301.

E-mail: nsmith@kalypsys.com

## TABLE OF CONTENTS

|                     |                                                                                           |
|---------------------|-------------------------------------------------------------------------------------------|
| <b>S-1</b>          | <b>Title Page.</b>                                                                        |
| <b>S-2 to S-15</b>  | <b>Experimental Section (Chemistry)</b>                                                   |
| <b>S-16 to S-19</b> | <b>Experimental Section (Methods)</b>                                                     |
| <b>S-20 to S-75</b> | <b><sup>1</sup>H NMR, <sup>13</sup>C NMR (when available), and LC trace (for purity).</b> |
| <b>S-76 to S-77</b> | <b>High Resolution Mass Spectrum (table format).</b>                                      |
| <b>S-78 to S-82</b> | <b>Crystal data, structure refinement and Atomic coordinates for Cpd 12</b>               |

**4-((2-Chlorophenylamino)methyl)-8-fluoroquinolin-2(1H)-one (55).** Compound **55** was synthesized as described for compound **53** using 4-(bromomethyl)-8-fluoroquinolin-2(1H)-one (**52**) and 2-chloroaniline as starting materials.  $^1\text{H}$  NMR (400 MHz, DMSO- $d_6$ )  $\delta$  11.63 (s, 1H), 7.67 (d, 1H,  $J$  = 8.0 Hz), 7.39 (dd, 1H,  $J$  = 11.2, 8.4 Hz), 7.23 (dd, 1H,  $J$  = 8.0, 1.6 Hz), 7.18-7.13 (m, 1H), 6.99 (td, 1H,  $J$  = 7.8, 1.6 Hz), 6.54 (td, 1H,  $J$  = 7.8, 1.0 Hz), 6.45 (dd, 1H,  $J$  = 8.4, 1.2 Hz), 6.23 (s, 1H), 6.14 (t, 1H,  $J$  = 5.6 Hz), 4.59 (d, 2H,  $J$  = 5.2 Hz). LRMS (ESI+)  $m/z$ : calcd for  $\text{C}_{16}\text{H}_{12}\text{ClFN}_2\text{O}$  303.1, found 303.2  $[\text{M} + \text{H}]^+$ .

**4-((3-Chlorophenylamino)methyl)-8-fluoroquinolin-2(1H)-one (56).** Compound **56** was synthesized as described for compound **53** using 4-(bromomethyl)-8-fluoroquinolin-2(1H)-one (**52**) and 3-chloroaniline as starting materials.  $^1\text{H}$  NMR (400 MHz, DMSO- $d_6$ )  $\delta$  11.67 (s, 1H), 7.65 (d, 1H,  $J$  = 8.4 Hz), 7.42 (ddd, 1H,  $J$  = 10.8, 8.0, 0.8 Hz), 7.19 (m, 1H), 7.06 (t, 1H,  $J$  = 8.4 Hz), 6.62 (m, 2H), 6.55 (d, 2H,  $J$  = 7.8 Hz), 6.42 (s, 1H), 4.53 (d, 2H,  $J$  = 5.2 Hz). LRMS (ESI+)  $m/z$ : calcd for  $\text{C}_{16}\text{H}_{12}\text{ClFN}_2\text{O}$  303.1, found 303.2  $[\text{M} + \text{H}]^+$ .

**4-((4-Chlorophenylamino)methyl)-8-fluoroquinolin-2(1H)-one (57).** Compound **57** was synthesized as described for compound **53** using 4-(bromomethyl)-8-fluoroquinolin-2(1H)-one (**52**) and 4-chloroaniline as starting materials.  $^1\text{H}$  NMR (400 MHz, DMSO- $d_6$ )  $\delta$  11.63 (s, 1H), 7.60 (d, 1H,  $J$  = 8.4 Hz), 7.38 (dd, 1H,  $J$  = 10.8, 7.2 Hz), 7.13 (m, 1H), 7.02 (m, 2H), 6.53 (d, 2H,  $J$  = 6.8 Hz), 6.48 (m, 1H), 6.36 (s, 1H), 4.46 (bs, 2H). LRMS (ESI+)  $m/z$ : calcd for  $\text{C}_{16}\text{H}_{12}\text{ClFN}_2\text{O}$  303.1, found 303.2  $[\text{M} + \text{H}]^+$ .

**8-Fluoro-4-((3-fluorophenylamino)methyl)quinolin-2(1H)-one (58).** Compound **58** was synthesized as described for compound **53** using 4-(bromomethyl)-8-fluoroquinolin-2(1H)-one (**52**) and 3-fluoroaniline as starting materials.  $^1\text{H}$  NMR (400 MHz, DMSO- $d_6$ )  $\delta$  11.68 (s, 1H), 7.65 (d, 1H,  $J$  = 8.4 Hz), 7.42 (ddd, 1H,  $J$  = 11.2, 8.4, 1.2 Hz), 7.18 (m, 1H), 7.07 (m, 1H), 6.63

(t, 1H,  $J = 5.6$  Hz), 6.43-6.29 (m, 4H), 4.53 (d, 2H,  $J = 6.0$  Hz). LRMS (ESI+)  $m/z$ : calcd for  $C_{16}H_{12}F_2N_2O$  287.1, found 287.2  $[M + H]^+$ .

**8-Fluoro-4-((3-cyanophenylamino)methyl)quinolin-2(1H)-one (59).** Compound **59** was synthesized as described for compound **53** using 4-(bromomethyl)-8-fluoroquinolin-2(1H)-one (**52**) and 3-aminobenzonitrile as starting materials.  $^1H$  NMR (400 MHz, DMSO- $d_6$ )  $\delta$  11.64 (s, 1H), 7.60 (d, 1H,  $J = 8.4$  Hz), 7.44-7.33 (m, 1H), 7.22-7.12 (m, 2H), 6.92-6.78 (m, 3H), 6.87 (m, 1H), 6.36 (s, 1H), 4.54 (d, 2H,  $J = 2.8$  Hz). LRMS (ESI+)  $m/z$ : calcd for  $C_{17}H_{12}FN_3O$  294.1, found 294.2  $[M + H]^+$ .

**8-Fluoro-4-((*m*-tolylamino)methyl)quinolin-2(1H)-one (60).** Compound **60** was synthesized as described for compound **53** using 4-(bromomethyl)-8-fluoroquinolin-2(1H)-one (**52**) and *m*-toluidine as starting materials.  $^1H$  NMR (400 MHz, DMSO- $d_6$ )  $\delta$  11.60 (s, 1H), 7.62 (d, 1H,  $J = 8.4$  Hz), 7.38 (ddd, 1H,  $J = 10.8, 7.6, 0.8$  Hz), 7.13 (m, 1H), 6.89 (m, 1H), 6.39-6.31 (m, 4H), 6.17 (m, 1H), 4.48 (bs, 2H), 2.09 (s, 3H). LRMS (ESI+)  $m/z$ : calcd for  $C_{17}H_{15}FN_2O$  283.1, found 283.2  $[M + H]^+$ .

**8-Fluoro-4-((3-methoxyphenylamino)methyl)quinolin-2(1H)-one (61).** Compound **61** was synthesized as described for compound **53** using 4-(bromomethyl)-8-fluoroquinolin-2(1H)-one (**52**) and 3-methoxyaniline as starting materials.  $^1H$  NMR (400 MHz, DMSO- $d_6$ )  $\delta$  11.61 (s, 1H), 7.62 (d, 1H,  $J = 8.4$  Hz), 7.38 (ddd, 1H,  $J = 10.8, 8.0, 0.8$  Hz), 7.13 (m, 1H), 6.90 (t, 1H,  $J = 7.6$  Hz), 6.39 (s, 1H), 6.28 (m, 1H), 6.14-6.08 (m, 3H), 4.45 (bs, 2H), 3.58 (s, 3H). LRMS (ESI+)  $m/z$ : calcd for  $C_{17}H_{15}FN_2O_2$  299.1, found 299.2  $[M + H]^+$ .

**2-(*tert*-Butyldimethylsilyloxy)-4-(chloromethyl)-8-fluoroquinoline (62).** To a stirred solution of 4-(bromomethyl)-8-fluoroquinolin-2(1H)-one (**52**, 1.28 g, 5.0 mmol) in DMF (50 mL) at 25°C was added *tert*-butyldimethylsilyl chloride (1.51 g, 10.0 mmol) followed by Et<sub>3</sub>N (2.4 mL, 17.5 mmol). After 4 h, the reaction mixture was poured into ice water (500 mL), and the resulting

precipitate was collected by vacuum filtration. The filter cake was washed with water (100 mL), then dried for 18 h to afford 2-(*tert*-butyldimethylsilyloxy)-4-(chloromethyl)-8-fluoroquinoline (**62**, 1.42 g, 88%) as a tan solid. <sup>1</sup>H NMR (400 MHz, DMSO-*d*<sub>6</sub>) δ 7.86 (d, 1H, *J* = 8.0 Hz), 7.52-7.45 (m, 2H), 7.23 (s, 1H), 5.18 (s, 2H), 0.98 (s, 9H), 0.38 (s, 6H). LRMS (ESI+) *m/z*: calcd for C<sub>16</sub>H<sub>21</sub>ClFNOSi 326.1, found 211.9 [M - TBDMS + H]<sup>+</sup>.

**2-(*tert*-Butyldimethylsilyloxy)-8-fluoro-4-(iodomethyl)quinoline (63).** Sodium iodide (157 mg, 1.05 mmol) was added to a stirred solution of 2-(*tert*-butyldimethylsilyloxy)-4-(chloromethyl)-8-fluoroquinoline (**62**, 325 mg, 1.0 mmol) in dry acetone at 25°C. After 2 h, the heterogeneous mixture was diluted with DCM (200 mL), dried over MgSO<sub>4</sub>, filtered, and concentrated under reduced pressure to afford 2-(*tert*-butyldimethylsilyloxy)-8-fluoro-4-(iodomethyl)quinoline (**63**, 390 mg, 94%) as an orange solid. <sup>1</sup>H NMR (400 MHz, CDCl<sub>3</sub>) δ 7.72 (d, 1H, *J* = 8.4 Hz), 7.37 (m, 1H), 7.30 (m, 1H), 7.00 (s, 1H), 4.67 (s, 2H), 1.02 (s, 9H), 0.44 (s, 6H). LRMS (ESI+) *m/z*: calcd for C<sub>16</sub>H<sub>21</sub>FINOSi 418.0, found 303.8 [M - TBDMS + H]<sup>+</sup>.

**N-(3-Chlorophenyl)-1-methyl-1H-imidazole-5-carboxamide (66).** O-(7-Azabenzotriazol-1-yl)-*N,N,N',N'*-tetramethyluronium hexafluorophosphate (HATU, 912 mg, 2.4 mmol) was added to a stirred mixture of 1-methyl-1H-imidazole-5-carboxylic acid (**65**, 252 mg, 2.0 mmol), 3-chloroaniline (**64**, 273 μL, 2.6 mmol), and Et<sub>3</sub>N (1.1 mL, 8.0 mmol) in DMF (10 mL). After 18 h at 25°C, the reaction mixture was diluted with 1:1 hexanes:EtOAc (200 mL), washed with 5% brine (3 x 50 mL), dried over MgSO<sub>4</sub>, filtered, and concentrated under reduced pressure. The resulting crude residue was purified by silica gel column chromatography (9:1 DCM/ACN) to afford N-(3-chlorophenyl)-1-methyl-1H-imidazole-5-carboxamide (**66**, 358 mg, 76%) as a tan solid. <sup>1</sup>H NMR (400 MHz, DMSO-*d*<sub>6</sub>) δ 10.03 (s, 1H), 8.04 (s, 1H), 7.82 (s, 1H), 7.75 (m, 2H), 7.30 (t, 1H, *J* = 8.2 Hz), 7.07 (d, 1H, *J* = 8.0 Hz), 3.71 (s, 3H).

**3-Chloro-N-((2-chloropyridin-4-yl)methyl)aniline (68).** A mixture of 4-(bromomethyl)-2-chloropyridine (**67**,<sup>11</sup> 3.6 g, 15.8 mmol), 3-chloroaniline (2.0 g, 15.47 mmol), and K<sub>2</sub>CO<sub>3</sub> (2.2 g, 15.78 mmol) in DMF (50 mL) was stirred for 2 h at 60°C. The resulting solution was diluted with water (150 mL) and extracted with EtOAc (2 x 100 mL). The organics were combined, dried over Na<sub>2</sub>SO<sub>4</sub>, filtered, and concentrated to dryness under reduced pressure. The residue was purified by silica gel column chromatography (1:5 EtOAc/Hexanes) to afford 2.8 g (67%) of 3-chloro-N-((2-chloropyridin-4-yl)methyl)aniline (**68**) as a yellow solid. LRMS (ESI+) *m/z*: calcd for C<sub>12</sub>H<sub>10</sub>Cl<sub>2</sub>N<sub>2</sub> 253.0, found 253.0 [M + H]<sup>+</sup>.

**N-(3-Chlorophenyl)-N-((2-chloropyridin-4-yl)methyl)-4-methylthiazole-5-carboxamide (69).** 4-Methylthiazole-5-carbonyl chloride (synthesis of acid chloride described for compound **7**, 1.43 g, 7.99 mmol) was added in several batches to 3-chloro-N-((2-chloropyridin-4-yl)methyl)aniline (**68**, 1.12 g, 3.98 mmol) in DMF (20 mL) cooled to 0°C. The resulting solution was stirred at 25°C for 2 h. The solvent was removed by evaporation under reduced pressure and the residue was purified by silica gel column chromatography (1:2 EtOAc/Hexanes) to afford 0.8 g (46%) of N-(3-chlorophenyl)-N-((2-chloropyridin-4-yl)methyl)-4-methylthiazole-5-carboxamide (**69**) as a yellow oil. <sup>1</sup>H NMR (300 MHz, DMSO-d<sub>6</sub>) δ 8.93 (s, 1H), 8.36 (d, 1H), 7.50 (m, 2H), 7.43 (d, 1H), 7.34 (m, 2H), 7.18 (d, 1H), 5.12 (s, 2H), 2.42 (s, 3H). LRMS (ESI+) *m/z*: calcd for C<sub>17</sub>H<sub>13</sub>Cl<sub>2</sub>N<sub>3</sub>OS 378.0, found 378.0 [M + H]<sup>+</sup>.

**(2-Chloro-5,6,7,8-tetrahydroquinolin-4-yl)methanol (71).** LiAlH<sub>4</sub> (190 mg, 5.00 mmol) was added to methyl 2-chloro-5,6,7,8-tetrahydroquinoline-4-carboxylate (**70**,<sup>i</sup> 200 mg, 0.88 mmol) in THF (10 mL) at 0°C. The resulting slurry was stirred at 0°C for 30 min. The reaction mixture was then quenched by adding water and 15% NaOH solution. The precipitate was filtered and dried to afford 250 mg (crude) of (2-chloro-5,6,7,8-tetrahydroquinolin-4-yl)methanol (**71**) as a white solid. LRMS (ESI+) *m/z*: calcd for C<sub>10</sub>H<sub>12</sub>ClNO 198.1, found 198.0 [M + H]<sup>+</sup>.

**4-(Bromomethyl)-2-chloro-5,6,7,8-tetrahydroquinoline (72).** PBr<sub>3</sub> (1.71 g, 6.31 mmol) in DCM (10 mL) was added dropwise to (2-chloro-5,6,7,8-tetrahydroquinolin-4-yl)methanol (**71**, 250 mg, 1.26 mmol) in DCM (5 mL) at 0°C. The resulting solution was stirred at 25°C for 30 min. The reaction mixture was then quenched with water (30 mL), neutralized to pH 7 using aqueous sodium bicarbonate, and extracted with DCM (4 x 120 mL). The organics were combined, dried over Na<sub>2</sub>SO<sub>4</sub>, and concentrated under reduced pressure to afford 160 mg (crude) of 4-(bromomethyl)-2-chloro-5,6,7,8-tetrahydroquinoline (**72**) as a white solid.

**3-Chloro-*N*-((2-chloro-5,6,7,8-tetrahydroquinolin-4-yl)methyl)aniline (73).** A mixture of 4-(bromomethyl)-2-chloro-5,6,7,8-tetrahydroquinoline (**72**, 860 mg, 3.30 mmol), 3-chloroaniline (420 mg, 3.28 mmol), and Na<sub>2</sub>CO<sub>3</sub> (350 mg) in DMF (20 mL) was heated to 60°C for 2 h. The resulting solution was diluted with water (60 mL) and extracted with EtOAc (5 x 300 mL). The organics were combined, dried over Na<sub>2</sub>SO<sub>4</sub>, and concentrated under reduced pressure. The residue was purified by silica gel column chromatography (1:20 EtOAc/Hexanes) to afford 600 mg of 3-chloro-*N*-((2-chloro-5,6,7,8-tetrahydroquinolin-4-yl)methyl)aniline (**73**) as a light yellow solid. LRMS (ESI+) *m/z*: calcd for C<sub>16</sub>H<sub>16</sub>Cl<sub>2</sub>N<sub>2</sub> 307.1, found 307.0 [M + H]<sup>+</sup>

***N*-((2-Chloro-5,6,7,8-tetrahydroquinolin-4-yl)methyl)-*N*-(3-chlorophenyl)-4-methylthiazole-5-carboxamide (74).** 4-Methylthiazole-5-carbonyl chloride (synthesis of acid chloride described in compound **7**, 700 mg, 4.32 mmol) in DMF (15 mL) was added dropwise to 3-chloro-*N*-((2-chloro-5,6,7,8-tetrahydroquinolin-4-yl)methyl)aniline (**73**, 510 mg, 1.66 mmol) in DMF (5 mL). The resulting solution was stirred at 25°C for 7 h. The reaction mixture was then quenched with water (60 mL) and extracted with EtOAc (4 x 240 mL). The organics were combined, dried over Na<sub>2</sub>SO<sub>4</sub>, and concentrated under reduced pressure. The residue was purified by silica gel column chromatography (1:5 EtOAc/Hexanes) to afford 420 mg of *N*-((2-chloro-5,6,7,8-tetrahydroquinolin-4-yl)methyl)-*N*-(3-chlorophenyl)-4-methylthiazole-5-carboxamide (**74**) as a light yellow solid. LRMS (ESI+) *m/z*: calcd for C<sub>21</sub>H<sub>21</sub>Cl<sub>2</sub>N<sub>3</sub>OS 432.0, found 432.0 [M + H]<sup>+</sup>.

Page 6 of 82

**8-Fluoro-4-methyl-2H-chromen-2-one (77).** A mixture of 1-(3-fluoro-2-hydroxyphenyl)ethanone (**75**, 13 g, 75.91 mmol) and (triphenylphosphoranylidene) acetic acid ethyl ester (**76**,<sup>ii</sup> 30 g, 86.2 mmol) in toluene (200 mL) was stirred at 120°C for 18 h. The mixture was concentrated under reduced pressure and the residue was partitioned between EtOAc (100 mL) and water (200 mL). The organic layer was isolated, washed with water (200 mL), dried over Na<sub>2</sub>SO<sub>4</sub>, filtered, and concentrated to dryness under reduced pressure. The residue was purified by silica gel column chromatography (1:25 EtOAc/Hexanes) to afford 5 g (35%) of 8-fluoro-4-methyl-2H-chromen-2-one (**77**) as a yellow solid. LRMS (ESI+) *m/z*: calcd for C<sub>10</sub>H<sub>7</sub>FO<sub>2</sub> 179.0, found 179.2 [M + H]<sup>+</sup>.

**4-(Bromomethyl)-8-fluoro-2H-chromen-2-one (78).** A mixture of 8-fluoro-4-methyl-2H-chromen-2-one (**77**, 5g, 25.3 mmol), NBS (6g, 33.71 mmol), AIBN (cat., 0.1 g) in CCl<sub>4</sub> (300 mL) was refluxed for 18 h. The reaction mixture was concentrated to dryness and the residue was purified by silica gel chromatography (1:20 EtOAc/Hexanes) to afford 1.17 g (17%) of 4-(bromomethyl)-8-fluoro-2H-chromen-2-one (**78**) as a yellow solid. LRMS (ESI+) *m/z*: calcd for C<sub>10</sub>H<sub>6</sub>BrFO<sub>2</sub> 256.9, found 257.0 [M + H]<sup>+</sup>.

**4-((3-Chlorophenylamino)methyl)-8-fluoro-2H-chromen-2-one (79).** A mixture of 4-(bromomethyl)-8-fluoro-2H-chromen-2-one (**78**, 500 mg, 1.94 mmol) and 3-chloroaniline (0.8 mL, 7.78 mmol) in DMSO (5 mL) was heated to 70°C for 1 h. The cooled reaction mixture was then poured into ice water, and extracted with DCM (3 x 50 mL). The organics were combined, dried over Na<sub>2</sub>SO<sub>4</sub>, filtered, and concentrated to dryness under reduced pressure. The residue was purified by silica gel chromatography (20-50% EtOAc/Hexanes) to afford 500 mg of 4-((3-chlorophenylamino)methyl)-8-fluoro-2H-chromen-2-one (**79**) as a yellow solid. LRMS (ESI+) *m/z*: calcd for C<sub>16</sub>H<sub>11</sub>ClFNO<sub>2</sub> 304.0, found 303.9 [M + H]<sup>+</sup>.

**4-(Bromomethyl)-8-fluoroquinoline (81).** A mixture of 8-fluoro-4-methylquinoline (**80**,<sup>iii</sup> 500 mg, 3.11 mmol), NBS (553 mg, 3.11 mmol), and AIBN (cat.) in CCl<sub>4</sub> (30 mL) was refluxed for 2 h. The reaction mixture was filtered to remove insoluble materials, and the filtrate was concentrated to dryness under reduced pressure. The residue was purified by silica gel chromatography (1:20 EtOAc/Hexanes) to afford 380 mg (51%) of 4-(bromomethyl)-8-fluoroquinoline (**81**) as a white solid. LRMS (ESI+) *m/z*: calcd for C<sub>10</sub>H<sub>7</sub>BrFN 239.9, found 240.0 [M + H]<sup>+</sup>.

**3-Chloro-*N*-((8-fluoroquinolin-4-yl)methyl)aniline (82).** A mixture of 4-(bromomethyl)-8-fluoroquinoline (**81**, 380 mg, 1.59 mmol), 3-chloroaniline (400 mg, 3.15 mmol), and K<sub>2</sub>CO<sub>3</sub> (440 mg, 3.19 mmol) in DMF (20 mL) was heated to 60°C for 2 h. The reaction mixture was filtered to remove insoluble materials, and then concentrated to dryness under reduced pressure. The residue was purified by silica gel chromatography (1:20 EtOAc/Hexanes) to afford 320 mg (70%) of 3-chloro-*N*-((8-fluoroquinolin-4-yl)methyl)benzenamine (**82**) as a white solid. LRMS (ESI+) *m/z*: calcd for C<sub>16</sub>H<sub>12</sub>ClFN<sub>2</sub> 287.1, found 287.0 [M + H]<sup>+</sup>.

***N*-Allyl-*N*-benzyl-2-fluoro-6-iodobenzamide (85).** A mixture of 2-fluoro-6-iodobenzoic acid (**84**, 30 g, 113 mmol) in SOCl<sub>2</sub> (60 mL) was heated to 80°C for 1.5 h. Excess SOCl<sub>2</sub> was removed under reduced pressure and the residue was taken up with a solution of Et<sub>3</sub>N (13.7 g, 136 mmol) in THF (50 mL). This solution was then added dropwise to a separate solution of *N*-benzylprop-2-en-1-amine (**83**, 16.6 g, 113 mmol) in THF (150 mL) at 5°C. The resulting reaction mixture was stirred at 25°C for 2 h. The mixture was concentrated under reduced pressure and the residue was dissolved in EtOAc (200 mL). The organic layer was washed with aqueous NaHSO<sub>4</sub> (2 x 50 mL), aqueous sodium bicarbonate (50 mL), and brine (50 mL), dried over Na<sub>2</sub>SO<sub>4</sub>, and concentrated to dryness under reduced pressure to afford 30 g (67%) of *N*-allyl-*N*-benzyl-2-fluoro-6-iodobenzamide (**85**) as a white solid. LRMS (ESI+) *m/z*: calcd for C<sub>17</sub>H<sub>15</sub>FINO 396.0, found 396.0 [M + H]<sup>+</sup>.



**2-Benzyl-8-fluoro-4-methylisoquinolin-1(2H)-one (86).** A mixture of *N*-allyl-*N*-benzyl-2-fluoro-6-iodobenzamide (**85**, 198 mg, 0.50 mmol), dicyclohexylamine (362 mg, 2.00 mmol), PPh<sub>3</sub> (13.1 mg, 0.05 mmol), and Pd(OAc)<sub>2</sub> (12 mg, 0.03 mmol) in DMA (7 mL) was heated to 100°C for 18 h. The mixture was concentrated under reduced pressure and the residue was purified by silica gel chromatography (1:30 EtOAc/Hexanes) to afford 83 mg (62%) of 2-benzyl-8-fluoro-4-methylisoquinolin-1(2H)-one (**86**) as a white solid. LRMS (ESI+) *m/z*: calcd for C<sub>17</sub>H<sub>14</sub>FNO 268.1, found 268.0 [M + H]<sup>+</sup>.

**8-Fluoro-4-methylisoquinolin-1(2H)-one (87).** A solution of 2-benzyl-8-fluoro-4-methylisoquinolin-1(2H)-one (**86**, 30 g, 112.36 mmol) in H<sub>2</sub>SO<sub>4</sub> (450 g) was heated to 150°C for 2.5 h. Adjustment of the pH to 9 was accomplished by the addition of NaOH (4M). The resulting aqueous solution was extracted with EtOAc (3 x 100 mL). The organics were combined, washed with brine (2 x 500 mL), filtered, dried over Na<sub>2</sub>SO<sub>4</sub>, and concentrated under reduced pressure to afford 15.8 g (79%) of 8-fluoro-4-methylisoquinolin-1(2H)-one (**87**) as a white solid. LRMS (ESI+) *m/z*: calcd for C<sub>10</sub>H<sub>8</sub>FNO 178.1, found 178.0 [M + H]<sup>+</sup>.

**1-Chloro-8-fluoro-4-methylisoquinoline (88).** A mixture of 8-fluoro-4-methylisoquinolin-1(2H)-one (**87**, 3 g, 16.95 mmol) in POCl<sub>3</sub> (40 mL) was heated to 80°C for 2 h. The mixture was concentrated to dryness and the residue was partitioned between EtOAc and H<sub>2</sub>O (1:1, 100 mL). Adjustment of the pH to 8 was accomplished by the addition of NH<sub>3</sub>·H<sub>2</sub>O (25%). The two layers were separated and the aqueous layer was extracted with EtOAc (50 mL). The organics were combined, dried over Na<sub>2</sub>SO<sub>4</sub>, filtered, and concentrated under reduced pressure to afford 3.3 g (99%) of 1-chloro-8-fluoro-4-methylisoquinoline (**88**) as a white solid. LRMS (ESI+) *m/z*: calcd for C<sub>10</sub>H<sub>7</sub>ClFN 196.0, found 196.0 [M + H]<sup>+</sup>.

**4-(Bromomethyl)-1-chloro-8-fluoroisoquinoline (89).** Compound **89** was synthesized as described for compound **81** using 1-chloro-8-fluoro-4-methylisoquinoline (**88**) as the starting material. LRMS (ESI+)  $m/z$ : calcd for  $C_{10}H_6BrClFN$  273.9, found 274.0  $[M + H]^+$ .

**3-Chloro-*N*-((1-chloro-8-fluoroisoquinolin-4-yl)methyl)benzenamine (90).** Compound **90** was synthesized as described for compound **82** using 1-chloro-8-fluoro-4-methylisoquinoline (**89**) and 3-chloroaniline as starting materials. LRMS (ESI+)  $m/z$ : calcd for  $C_{16}H_{11}Cl_2FN_2$  321.0, found 321.0  $[M + H]^+$ .

**3-Chloro-*N*-((8-fluoroisoquinolin-4-yl)methyl)benzenamine (91).** A solution of 3-chloro-*N*-((1-chloro-8-fluoroisoquinolin-4-yl)methyl)benzenamine (**90**, 500 mg, 1.56 mmol) and Pd/C (cat.) in MeOH (20 mL) was hydrogenated (with a balloon of hydrogen) for 4 h at 25°C. A filtration through celite was performed to remove the Pd/C and the filtrate was evaporated to dryness under reduced pressure. The residue was dissolved in EtOAc (30 mL) and the organic layer was washed with aqueous sodium bicarbonate (2 x 20 mL) and brine (2 x 20 mL). The organic layer was dried over  $Na_2SO_4$ , filtered, and concentrated under reduced pressure to afford 380 mg (85%) of 3-chloro-*N*-((8-fluoroisoquinolin-4-yl)methyl)benzenamine (**91**) as a beige solid.  $^1H$ NMR (400MHz, DMSO- $d_6$ )  $\delta$  9.41 (s, 1H), 8.59 (s, 1H), 7.99 (d, 1H,  $J = 8.4$  Hz), 7.84 (m, 1H), 7.52 (dd, 1H,  $J = 10.8, 8.0$  Hz), 7.06 (t, 1H,  $J = 8.4$  Hz), 6.61 (m, 1H), 6.62-6.53 (m, 3H), 4.69 (d, 2H,  $J = 5.2$  Hz). LRMS (ESI+)  $m/z$ : calcd for  $C_{16}H_{12}ClFN_2$  287.1, found 287.0  $[M + H]^+$ .

***N*-(2-Chlorophenyl)-3-oxobutanamide (98).** Compound **98** was synthesized as described for compound **49** using 3-oxobutanoate and 2-chloroaniline (**92**) as starting materials.  $^1H$  NMR (400 MHz,  $CDCl_3$ )  $\delta$  9.62 (s, 1H), 8.32 (dd, 1H,  $J = 8.2, 0.8$  Hz), 7.37 (d, 1H,  $J = 8.0$  Hz), 7.25 (t, 1H,  $J = 8.0$  Hz), 7.05 (t, 1H,  $J = 8.0$  Hz), 3.64 (s, 2H), 2.34 (s, 3H).

***N*-(3-Fluorophenyl)-3-oxobutanamide (99).** Compound **99** was synthesized as described for compound **49** using 3-oxobutanoate and 3-fluoroaniline (**93**) as starting materials. LRMS (ESI+) *m/z*: calcd for C<sub>10</sub>H<sub>10</sub>FNO<sub>2</sub> 196.0, found 195.9 [M + H]<sup>+</sup>.

***N*-(4-Fluorophenyl)-3-oxobutanamide (100).** Compound **100** was synthesized as described for compound **49** using 3-oxobutanoate and 4-fluoroaniline (**94**) as starting materials. LRMS (ESI+) *m/z*: calcd for C<sub>10</sub>H<sub>10</sub>FNO<sub>2</sub> 196.0, found 196.0 [M + H]<sup>+</sup>.

***N*-(2-Bromo-5-fluorophenyl)-3-oxobutanamide (101).** Compound **101** was synthesized as described for compound **49** using 3-oxobutanoate and 2-bromo-5-fluoroaniline (**95**) as starting materials. <sup>1</sup>H NMR (400 MHz, CDCl<sub>3</sub>) δ 9.73 (s, 1H), 8.20 (dd, 1H, *J* = 11.0, 3.0 Hz), 7.48 (dd, 1H, *J* = 8.8, 5.6 Hz), 6.72 (m, 1H), 3.65 (s, 2H), 2.33 (s, 3H). LRMS (ESI+) *m/z*: calcd for C<sub>10</sub>H<sub>9</sub>BrFNO<sub>2</sub> 273.9, found 277.9 [M + H]<sup>+</sup>.

***N*-(2,3-Difluorophenyl)-3-oxobutanamide (102).** Compound **102** was synthesized as described for compound **49** using 3-oxobutanoate and 2,3-difluoroaniline (**96**) as starting materials. <sup>1</sup>H NMR (400 MHz, CDCl<sub>3</sub>) δ 9.52 (s, 1H), 7.99 (m, 1H), 7.04 (m, 1H), 6.89 (s, 1H), 3.64 (s, 2H), 2.33 (s, 3H). LRMS (ESI+) *m/z*: calcd for C<sub>10</sub>H<sub>9</sub>F<sub>2</sub>NO<sub>2</sub> 214.0, found 214.1 [M + H]<sup>+</sup>.

**4-Bromo-*N*-(2-chlorophenyl)-3-oxobutanamide (103).** Compound **103** was synthesized as described for compound **50** using *N*-(2-chlorophenyl)-3-oxobutanamide (**98**) as the starting material. <sup>1</sup>H NMR (400 MHz, CDCl<sub>3</sub>) δ 9.10 (s, 1H), 8.30 (dd, 1H, *J* = 8.4, 1.2 Hz), 7.39 (dd, 1H, *J* = 8.4, 1.4 Hz), 7.27 (m, 1H), 7.07 (td, 1H, *J* = 8.2, 1.6 Hz), 4.07 (s, 2H), 3.87 (s, 2H).

**4-Bromo-*N*-(3-fluorophenyl)-3-oxobutanamide (104).** Compound **104** was synthesized as described for compound **50** using *N*-(3-fluorophenyl)-3-oxobutanamide (**99**) as the starting material. LRMS (ESI+) *m/z*: calcd for C<sub>10</sub>H<sub>9</sub>BrFNO<sub>2</sub> 273.9, found 273.8 [M + H]<sup>+</sup>.

**4-Bromo-*N*-(4-fluorophenyl)-3-oxobutanamide (105).** Compound **105** was synthesized as described for compound **50** using *N*-(4-fluorophenyl)-3-oxobutanamide (**100**) as the starting material. LRMS (ESI+) *m/z*: calcd for C<sub>10</sub>H<sub>9</sub>BrFNO<sub>2</sub> 273.9, found 274.0 [M + H]<sup>+</sup>.

**4-Bromo-*N*-(2-bromo-5-fluorophenyl)-3-oxobutanamide (106).** Compound **106** was synthesized as described for compound **50** using *N*-(2-bromo-5-fluorophenyl)-3-oxobutanamide (**101**) as the starting material. <sup>1</sup>H NMR (400 MHz, DMSO-*d*<sub>6</sub>) δ 9.79 (s, 1H), 7.72 (m, 2H), 7.03 (m, 1H), 4.49 (s, 2H), 3.87 (s, 2H).

**4-Bromo-*N*-(2,3-difluorophenyl)-3-oxobutanamide (107).** Compound **107** was synthesized as described for compound **50** using *N*-(2,3-difluorophenyl)-3-oxobutanamide (**102**) as the starting material. <sup>1</sup>H NMR (400 MHz, CDCl<sub>3</sub>) δ 8.91 (s, 1H), 8.05 (m, 1H), 7.09 (m, 1H), 6.95 (m, 1H), 4.02 (s, 2H), 3.82 (s, 2H). LRMS (ESI+) *m/z*: calcd for C<sub>10</sub>H<sub>8</sub>BrF<sub>2</sub>NO<sub>2</sub> 291.9, found 292.0 [M + H]<sup>+</sup>.

**4-Bromo-2-fluoro-*N*-(2-fluorophenyl)-3-oxobutanamide (108).** A mixture of 4-bromo-*N*-(2-fluorophenyl)-3-oxobutanamide (**50**, 1 g, 3.65 mmol) and Selectfluor® (0.7 g, 4.74 mmol) in ACN (30 mL) was heated to 60°C for 2 h. The solvent was removed under reduced pressure and the residue was dissolved in DCM (30 mL). The organic layer was washed with water (2 x 10 mL), dried over MgSO<sub>4</sub>, filtered, and concentrated under reduced pressure. The crude residue was purified by silica gel column chromatography (0- 50% EtOAc/Hexanes) to afford 0.5 g of 4-bromo-2-fluoro-*N*-(2-fluorophenyl)-3-oxobutanamide (**108**) as a yellow solid. <sup>1</sup>H NMR (400 MHz, CDCl<sub>3</sub>) δ 8.21 (s, 1H), 8.19 (m, 1H), 7.17-7.11 (m, 3H), 5.84 (d, 1H, *J* = 48.4 Hz), 4.34 (dd, 2H, *J* = 69.6, 12.8 Hz).

**4-(Bromomethyl)-8-chloroquinolin-2(1H)-one (109).** Compound **109** was synthesized as described for compound **52** using 4-bromo-*N*-(2-chlorophenyl)-3-oxobutanamide (**103**) as the starting material. LRMS (ESI+) *m/z*: calcd for C<sub>10</sub>H<sub>7</sub>BrClNO 271.9, found 272.8 [M + H]<sup>+</sup>.

**4-(Bromomethyl)-7-fluoroquinolin-2(1H)-one (110).** Compound **110** was synthesized as described for compound **52** using 4-bromo-*N*-(3-fluorophenyl)-3-oxobutanamide (**104**) as the starting material. <sup>1</sup>H NMR (400 MHz, DMSO-*d*<sub>6</sub>) δ 11.91 (s, 1H), 7.90 (dd, 1H, *J* = 9.0, 5.8 Hz), 7.11 (m, 2H), 6.70 (s, 1H), 4.89 (s, 2H). LRMS (ESI+) *m/z*: calcd for C<sub>10</sub>H<sub>7</sub>BrFNO 255.9, found 255.8 [M + H]<sup>+</sup>.

**4-(Bromomethyl)-6-fluoroquinolin-2(1H)-one (111).** Compound **111** was synthesized as described for compound **52** using 4-bromo-*N*-(4-fluorophenyl)-3-oxobutanamide (**105**) as the starting material. LRMS (ESI+) *m/z*: calcd for C<sub>10</sub>H<sub>7</sub>BrFNO 255.9, found 256.0 [M + H]<sup>+</sup>.

**8-Bromo-4-(bromomethyl)-5-fluoroquinolin-2(1H)-one (112).** Compound **112** was synthesized as described for compound **52** using 4-bromo-*N*-(2-bromo-5-fluorophenyl)-3-oxobutanamide (**106**) as the starting material. <sup>1</sup>H NMR (400 MHz, DMSO-*d*<sub>6</sub>) δ 10.64 (s, 1H), 7.91 (dd, 1H, *J* = 9.0, 5.0), 7.14 (m, 1H), 6.90 (s, 1H), 4.88 (s, 2H).

**4-(Bromomethyl)-7,8-difluoroquinolin-2(1H)-one (113).** Compound **113** was synthesized as described for compound **52** using 4-bromo-*N*-(2,3-difluorophenyl)-3-oxobutanamide (**107**) as the starting material. <sup>1</sup>H NMR (400 MHz, DMSO-*d*<sub>6</sub>) δ 7.70 (m, 1H), 7.34 (m, 1H), 6.78 (s, 1H), 4.90 (s, 2H).

**4-(Bromomethyl)-3,8-difluoroquinolin-2(1H)-one (114).** Compound **114** was synthesized as described for compound **52** using 4-bromo-2-fluoro-*N*-(2-fluorophenyl)-3-oxobutanamide (**108**) as the starting material. <sup>1</sup>H NMR (400 MHz, DMSO-*d*<sub>6</sub>) δ 12.50 (s, 1H), 7.72 (d, 1H, *J* = 8.0 Hz), 7.47 (dd, 1H, *J* = 10.8, 7.6 Hz), 7.31 (m, 1H), 4.91 (s, 2H). LRMS (ESI+) *m/z*: calcd for C<sub>10</sub>H<sub>6</sub>BrF<sub>2</sub>NO 273.9, found 273.7 [M + H]<sup>+</sup>.

**4-((3-Chlorophenylamino)methyl)quinolin-2(1H)-one (115).** Compound **115** was synthesized as described for compound **53** using 4-(bromomethyl) quinolin-2(1H)-one (**51**, commercially

available) and 3-chloroaniline as starting materials.  $^1\text{H}$  NMR (400 MHz, DMSO- $d_6$ )  $\delta$  11.68 (s, 1H), 7.82 (dd, 1H,  $J$  = 8.2, 1.2 Hz), 7.51 (td, 1H,  $J$  = 8.4, 1.2 Hz), 7.33 (dd, 1H,  $J$  = 8.4, 1.2 Hz), 7.20 (td, 1H,  $J$  = 8.0, 1.2 Hz), 7.06 (t, 1H,  $J$  = 8.0 Hz), 6.61 (s, 1H), 6.54 (m, 2H), 6.37 (s, 1H), 4.54 (s, 2H). LRMS (ESI+)  $m/z$ : calcd for  $\text{C}_{16}\text{H}_{13}\text{ClN}_2\text{O}$  285.1, found 285.2  $[\text{M} + \text{H}]^+$ .

**8-Chloro-4-((3-chlorophenylamino)methyl)quinolin-2(1H)-one (116).** Compound **116** was synthesized as described for compound **53** using 4-(bromomethyl)-8-chloroquinolin-2(1H)-one (**109**) and 3-chloroaniline as starting materials.  $^1\text{H}$  NMR (400 MHz, DMSO- $d_6$ )  $\delta$  10.92 (s, 1H), 7.84 (d, 1H,  $J$  = 8.4 Hz), 7.69 (d, 1H,  $J$  = 8.0 Hz), 7.23 (t, 1H,  $J$  = 7.8 Hz), 7.08 (t, 1H,  $J$  = 8.0 Hz), 6.64-6.56 (m, 3H), 6.46 (s, 1H), 4.58 (m, 2H). LRMS (ESI+)  $m/z$ : calcd for  $\text{C}_{16}\text{H}_{12}\text{Cl}_2\text{N}_2\text{O}$  319.0, found 318.9  $[\text{M} + \text{H}]^+$ .

**4-((3-Chlorophenylamino)methyl)-7-fluoroquinolin-2(1H)-one (117).** Compound **117** was synthesized as described for compound **53** using 4-(bromomethyl)-7-fluoroquinolin-2(1H)-one (**110**) and 3-chloroaniline as starting materials. LRMS (ESI+)  $m/z$ : calcd for  $\text{C}_{16}\text{H}_{12}\text{ClFN}_2\text{O}$  303.1, found 302.9  $[\text{M} + \text{H}]^+$ .

**4-((3-Chlorophenylamino)methyl)-6-fluoroquinolin-2(1H)-one (118).** Compound **118** was synthesized as described for compound **53** using 4-(bromomethyl)-6-fluoroquinolin-2(1H)-one (**111**) and 3-chloroaniline as starting materials.

**8-Bromo-4-((3-chlorophenylamino)methyl)-5-fluoroquinolin-2(1H)-one (119).** Compound **119** was synthesized as described for compound **53** using 8-bromo-4-(bromomethyl)-5-fluoroquinolin-2(1H)-one (**112**) and 3-chloroaniline as starting materials. LRMS (ESI+)  $m/z$ : calcd for  $\text{C}_{16}\text{H}_{11}\text{BrClFN}_2\text{O}$  380.9, found 380.6  $[\text{M} + \text{H}]^+$ .

**4-((3-Chlorophenylamino)methyl)-7,8-difluoroquinolin-2(1H)-one (120).** Compound **120** was synthesized as described for compound **53** using 4-(bromomethyl)-7,8-difluoroquinolin-2(1H)-

one (**113**) and 3-chloroaniline as starting materials.  $^1\text{H}$  NMR (400 MHz, DMSO- $d_6$ )  $\delta$  11.96 (s, 1H), 7.70 (m, 1H), 7.30 (m, 1H), 7.08 (t, 1H,  $J = 8.0$  Hz), 6.63-6.55 (m, 3H), 6.40 (s, 1H), 4.54 (m, 2H). LRMS (ESI+)  $m/z$ : calcd for  $\text{C}_{16}\text{H}_{11}\text{ClF}_2\text{N}_2\text{O}$  321.0, found 320.9  $[\text{M} + \text{H}]^+$ .

**4-((3-Chlorophenylamino)methyl)-3,8-difluoroquinolin-2(1H)-one (121).** Compound **121** was synthesized as described for compound **53** using 4-(bromomethyl)-3,8-difluoroquinolin-2(1H)-one (**114**) and 3-chloroaniline as starting materials. LRMS (ESI+)  $m/z$ : calcd for  $\text{C}_{16}\text{H}_{11}\text{ClF}_2\text{N}_2\text{O}$  321.0, found 320.8  $[\text{M} + \text{H}]^+$ .

***N*-((8-Bromo-5-fluoro-2-oxo-1,2-dihydroquinolin-4-yl)methyl)-*N*-(3-chlorophenyl)-4-methylthiazole-5-carboxamide (122).** Compound **122** was synthesized as described for compound **7** using 8-bromo-4-((3-chlorophenylamino)methyl)-5-fluoroquinolin-2(1H)-one (**119**) and 4-methylthiazole-5-carboxylic acid as starting materials.  $^1\text{H}$  NMR (400 MHz, DMSO- $d_6$ )  $\delta$  10.59 (s, 1H), 8.97 (s, 1H), 7.90 (dd, 1H,  $J = 8.4, 4.8$  Hz), 7.56 (s, 1H), 7.34-7.31 (m, 2H), 7.27 (m, 1H), 7.10 (dd, 1H,  $J = 12.0, 8.4$  Hz), 6.54 (s, 1H), 5.36 (s, 2H), 2.44 (s, 3H). LRMS (ESI+)  $m/z$ : calcd for  $\text{C}_{21}\text{H}_{14}\text{BrClFN}_3\text{O}_2\text{S}$  505.9, found 505.7  $[\text{M} + \text{H}]^+$ .

**Low Temperature SDS-PAGE:** RAW 264.7 cells were seeded into 6-well dishes at a density of  $1.5 \times 10^6$  cells/well in 2 mL of growth media. Cells were incubated for 2-3 h at 37°C and 10% CO<sub>2</sub>. Next, 1 mL of media was removed from each well and replaced with 1 mL of a 2X cocktail containing IFN $\gamma$  (100 U/mL final), LPS (2  $\mu$ g/mL final) and compound or vehicle (0.1% DMSO final) diluted in DMEM without serum. Cells were incubated overnight (~15 hr) at 37°C and 10% CO<sub>2</sub>. Cells were washed once with ice cold PBS and then 200  $\mu$ L of ice-cold lysis buffer containing protease inhibitors was added to each well. Cells were scraped from the dish and transferred to micro-centrifuge tubes on ice. Samples were sonicated for 5 seconds at setting 4 and centrifuged for 10 minutes at 4°C. Supernatants were transferred to clean tubes and stored on ice. The concentration of protein in the cell extracts was determined using a Bradford assay with a BSA standard curve as described by the manufacturer (Advanced). Equivalent amounts of protein extracts were added to micro-centrifuge tubes and the volume was adjusted to 10  $\mu$ L with lysis buffer. An equal volume of ice-cold 2X loading buffer was added to each sample and gently pipetted to mix. Samples were stored on ice until ready to load. Twenty microliters of each sample was loaded onto a 15-well 4-20% Tris-glycine polyacrylamide gel. The gel was run in pre-chilled 1X SDS running buffer in a cold room for 2.5 h at 125 V. Proteins were transferred to nitrocellulose for 2.5 h at 70 V in 1X transfer buffer. The membrane was blocked overnight in Blotto diluted in western wash buffer at 4°C. The membrane was incubated in a 1:2500 dilution of mouse anti-iNOS antibody (BD Biosciences) in Blotto for 1 h at room temperature followed by 3 x 5 min washes in western wash buffer. The blot was then incubated in a 1:2000 dilution of goat anti-mouse HRP-conjugated secondary antibody (Santa Cruz Biotech) in Blotto for 1 hour at room temperature. Following 4 x 5 min washes, the proteins were visualized by chemiluminescence using West Dura detection reagent as described by the manufacturer (Pierce). The data were captured on a CCD-based imaging device (Alpha Inotech).



**X-Ray Diffraction Data:** *Crystal data:* C<sub>21</sub>H<sub>15</sub>ClFN<sub>3</sub>O<sub>2</sub>S, f.w. = 427.87, colorless needle, triclinic, *P*-1, *a* = 8.8921(13), *b* = 17.982(3), *c* = 18.935(3) Å,  $\alpha$  = 72.680(2),  $\beta$  = 82.543(2),  $\gamma$  = 77.465(2)°, *V* = 2814.5 Å<sup>3</sup>, *Z* = 6, *Z'* = 3, *d*(calcd) = 1.515 g cm<sup>-3</sup>. 16620 reflections were collected at 100 K using a Bruker D8 platform diffractometer with an APEX CCD detector and MoK $\alpha$  radiation. The structure was refined using 9455 independent reflections with all nonhydrogen atoms anisotropic and hydrogen atoms treated as idealized contributions. The symmetry independent structure consists of three chemically similar molecules. All software is contained in the APEX, SAINT and SHELXTL libraries of programs maintained by Bruker-AXS (Madison, WI).

**Mouse Pharmacokinetics:** Male (Balb/c) mice (6 to 8 weeks of age) were obtained from Charles-River Laboratories (Hollister, CA). Animals were acclimated for a minimum of 3 days prior to performing any experimental procedures. A 12-hr light: 12-hr dark cycle was maintained throughout the course of all experiments in a temperature and humidity controlled vivarium facility. Animals were fed standard laboratory rodent chow, and water *ad libitum*. For intravenous (IV) administration, 12 overnight fasted animals received a single dose of 3 or 1 mg/kg body weight (3 or 1 mL/kg) via penile vein injection under light isoflurane anesthesia in 10% DMSO; 30% PEG-400 and 60% HP $\beta$ CD (30% w/v in water). For oral (PO) administration, 9 overnight fasted animals received a single dose of 10 mg/kg body weight (10 mL/kg) via oral gavage in a suspension of 0.5% Tween-80, 0.5% PVP-K30, 9% PEG-400 and 90% CMC in water (0.5% w/v). PO dose suspensions were dispersed with an electric homogenizer, followed by treatment with a sonicator probe on wet ice. Blood samples (~ 125  $\mu$ L) were collected by puncture of the submandibular vein (i.e. the cheek pouch method) into lithium heparin pre-treated tubes at 0 (pre-dose), 5, 10, 20 and 40 minutes, 1, 2, 4, 8, 12 and 24 hours following IV administration and at 0 (pre-dose), 0.25, 0.5, 1, 2, 4, 8, 12 and 24 hours post-dose following PO

administration, such that no animal was sampled more than 3 times. Plasma was isolated by centrifugation and stored at -80°C until analysis by LC-MS/MS.

Sample analyses were performed by LC-MS using a PE Sciex API 4000 Q-Trap mass spectrometer tandem with Agilent 1100 chromatography system. Polar-RP Synergi column from Phenomenex (2.0 x 3.0 mm, 4.0 micron). Chromatography was performed using a gradient system using two mobile phases A and B. The mobile phase A consisted of 0.1% formic acid in water and mobile phase B of 0.1% formic acid in acetonitrile. Mobile phase B was ramped from 0% to 100% from 0.0 to 1.0 min and was held at 100% B from 1.0 to 1.9 min. From 2.0 to 2.7 min, column was equilibrated to the initial condition at 100% A. Flow rate for the gradient was set at 1.0 mL/min. Mass spectrometry detection was carried out on a PE Sciex API4000 Q-Trap equipped with a Turbo IonSpray source. ESI+ mass spectra were acquired with multiple reaction monitoring (MRM). The plasma samples were prepared by protein precipitation monitored with an internal standard. Standard curve was prepared by spiking control plasma with the compound and serial dilutions from this spiked solution generated different levels of the standard curve. A weighted linear least squares regression was then performed to generate a correlation between concentration and the relative amounts of analyte and internal standard for compound. Twelve standard curve were used, highest level at 10,000 ng/mL. Lowest level of detection was at 4.0 ng/mL.

**Mouse Liver Microsome Assay:** Test article in DMSO was added to incubation buffer such that the final DMSO concentration was 0.4% (v/v). Microsomes were stored at -70°C until use, thawed on ice and then diluted to 5 mg/mL in Phosphate buffer immediately before use. Microsome incubations were performed in 100 mM Phosphate buffer (pH 7.4), containing 0.1% BSA (fatty acid free), 1 mM EDTA, 3 mM MgCl<sub>2</sub>, alamethicin (50 µg/mg microsomal protein) and 1.25 mM D-Saccharic acid 1,4-lactone. D-saccharic acid 1,4-lactone is an inhibitor of  $\beta$ -glucuronidase, an enzyme which can rapidly hydrolyze glucuronide conjugates. Microsomes

Page 18 of 82

and test article in incubation buffer were pre-warmed in triplicate at 37°C for 5 minutes. Reactions were initiated by addition of 25 µL of NADPH-regenerating system (consisting of 20 mM NADP, 100 mM glucose-6-phosphate, 20 U/mL glucose-6-phosphate dehydrogenase and 100 mM UDPGA). Final incubation volume was 0.5 mL with a test article concentration of 5 µM. At specified time points, 100 µL aliquots were removed and combined with 300 µL of chilled quenching reagent (1:2 water: acetonitrile) containing internal standard (IS). Sample plates were then centrifuged at 1,500 g for 15 minutes and supernatants submitted for LC-MS/MS analysis. Relative test article concentrations were defined by the analyte/IS peak ratios in each sample.

**Cytochrome P450 Inhibition Assay:** Compounds were evaluated for biochemical inhibition of cytochrome P450 using the Vivid CYP450 Blue assay (Invitrogen) adapted to 1536-well plate format. Briefly, individual isozymes and their blue substrates were diluted to a 2X working concentration in 1X assay buffer. Isozyme concentrations were: 3A4, 10 nM; 2D6, 40 nM; 1A2, 12 nM; 2C9, 20 nM; and 2C19, 10 nM. 2X Regeneration System was included in the isozyme mix. Substrate concentrations were: 40 nM for 3A4 and 2D6; 20 µM for 1A2, 2C9, and 2C19. NADP<sup>+</sup> was added to the substrate mix at a concentration of 400 µM for the assays. A volume of 2.5 µL of the isozyme mix was dispensed into black Greiner 1536-well plates. Then, 30 nL of compound was added to the wells. Subsequently, 2.5 µL of the blue substrate was added and plates were incubated for 1 hour at room temperature. Four replicate data points are obtained per compound at each concentration. Inhibition of substrate turnover was measured using a fluorescent plate reader with excitation at 405 nm and emission at 450 nm (Molecular Devices).

**Compound 7: *N*-((2-Oxo-1,2-dihydroquinolin-4-yl)methyl)-*N*-phenylfuran-2-carboxamide**

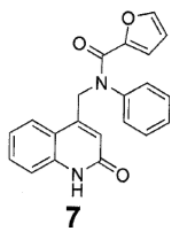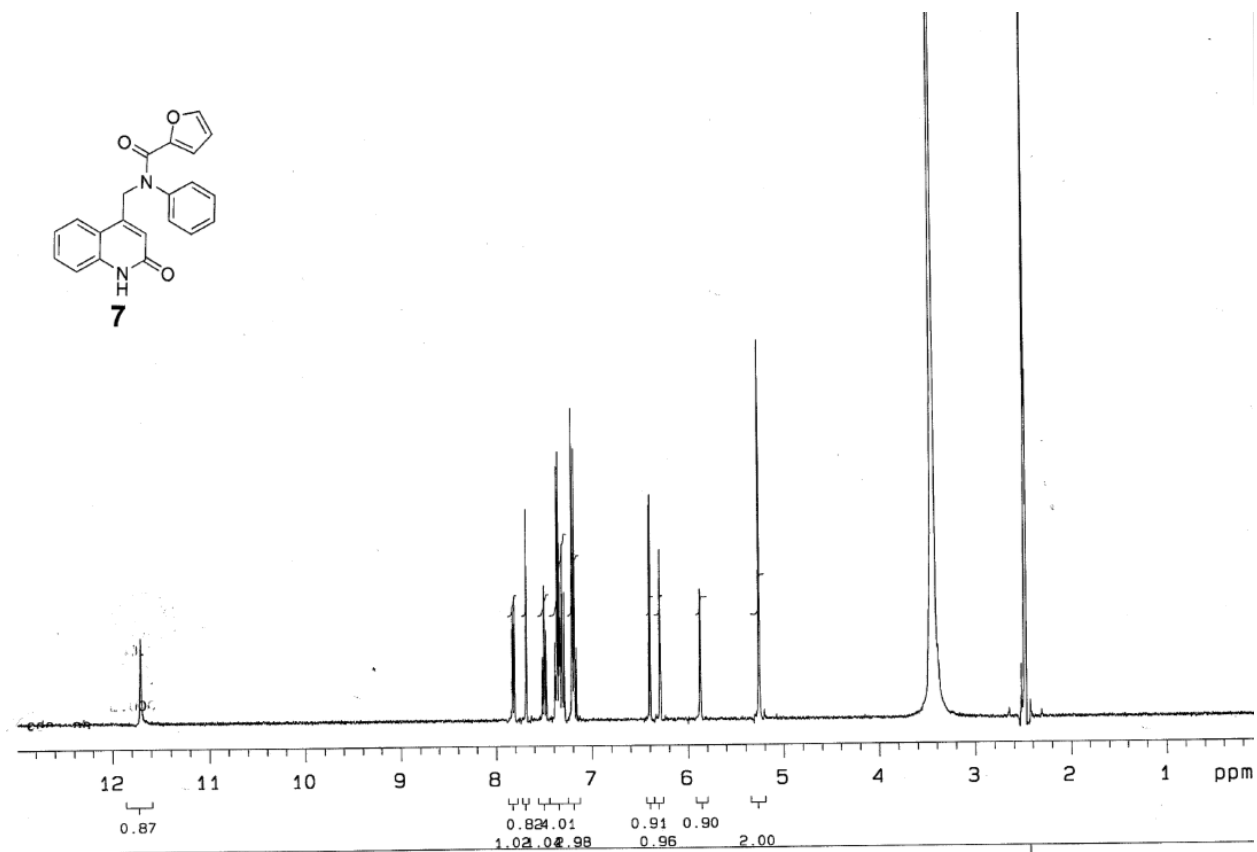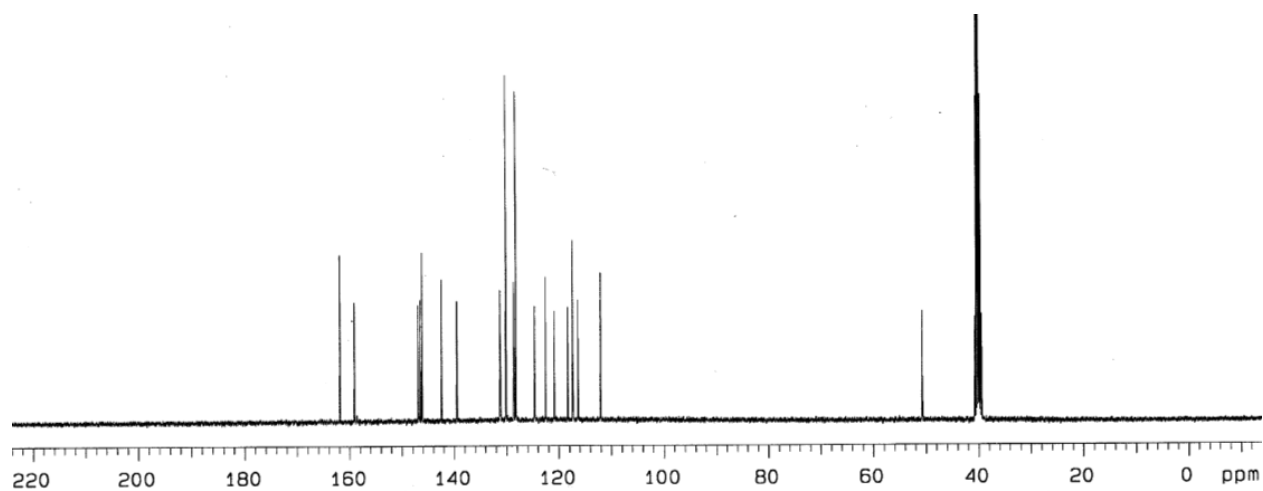

Injection Date : 11/27/2007 5:28:12 PM Seq. Line : 9  
 Sample Name : Location : Vial 6  
 Acq. Operator : 14 Inj : 1  
 Acq. Instrument : Kalypsys Inj Volume : 3 µl  
 Sequence File : C:\CHEM32\1\SEQUENCE\DEF\_LC2.S  
 Method : C:\CHEM32\1\METHODS\1-95\_LC.M  
 Last changed : 11/27/2007 11:40:02 AM by 14  
 1%-95% AcCN in H2O, .05%TFA

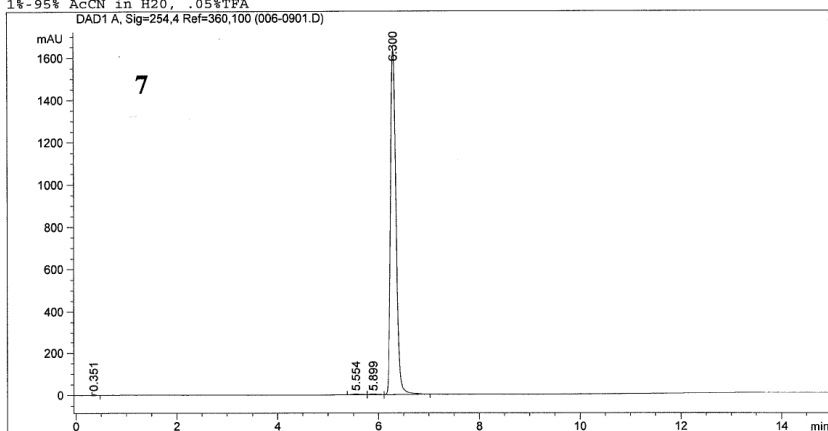

#### Area Percent Report

Sorted By : Signal  
 Multiplier : 1.0000  
 Dilution : 1.0000  
 Use Multiplier & Dilution Factor with ISTDs

Signal 1: DAD1 A, Sig=254,4 Ref=360,100

| Peak # | RetTime [min] | Type | Width [min] | Area [mAU*s] | Height [mAU] | Area %  |
|--------|---------------|------|-------------|--------------|--------------|---------|
| 1      | 0.351         | BB   | 0.0590      | 24.60641     | 5.62442      | 0.1942  |
| 2      | 5.554         | VV   | 0.1580      | 40.20696     | 3.78339      | 0.3173  |
| 3      | 5.899         | VV   | 0.1354      | 32.18579     | 3.70222      | 0.2540  |
| 4      | 6.300         | VB   | 0.1214      | 1.25742e4    | 1640.98657   | 99.2345 |

Totals : 1.26712e4 1654.09661

### Compound 8: *N*-((8-Fluoro-2-oxo-1,2-dihydroquinolin-4-yl)methyl)-*N*-phenylfuran-2-carboxamide

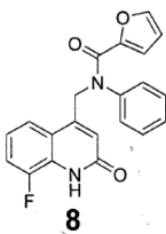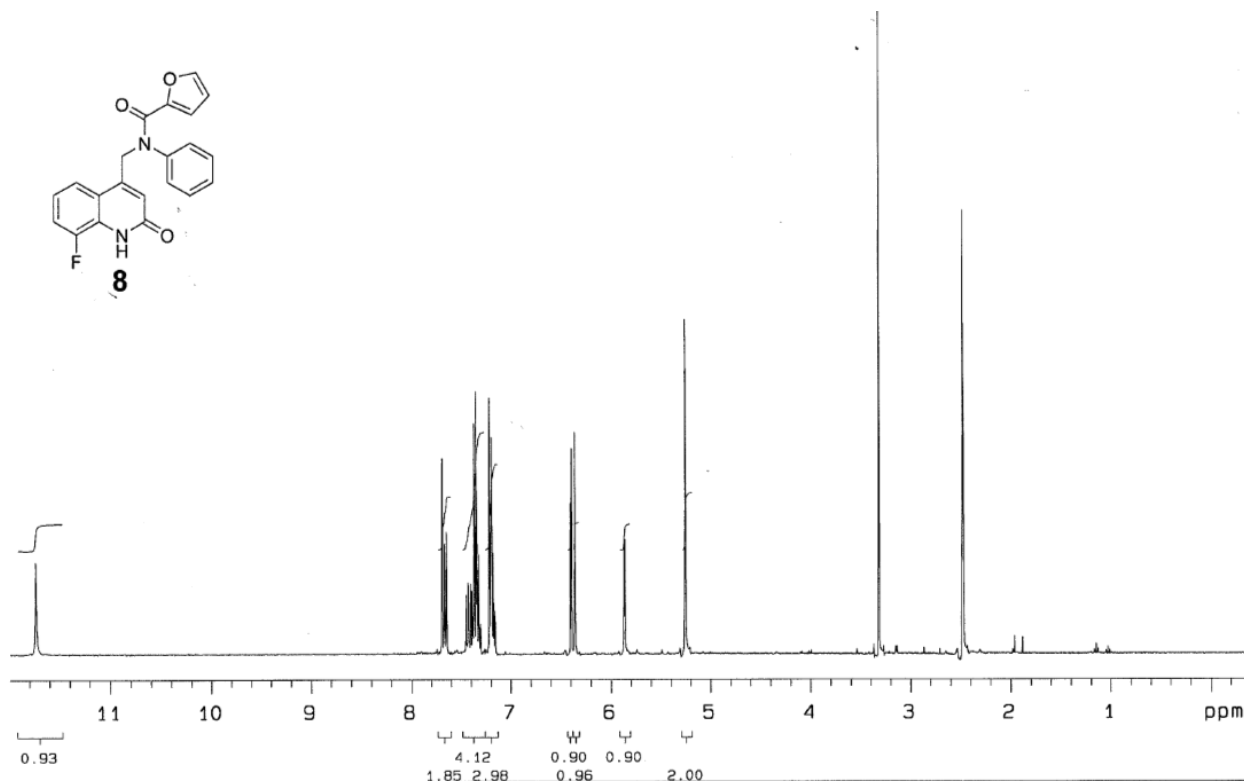

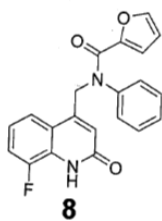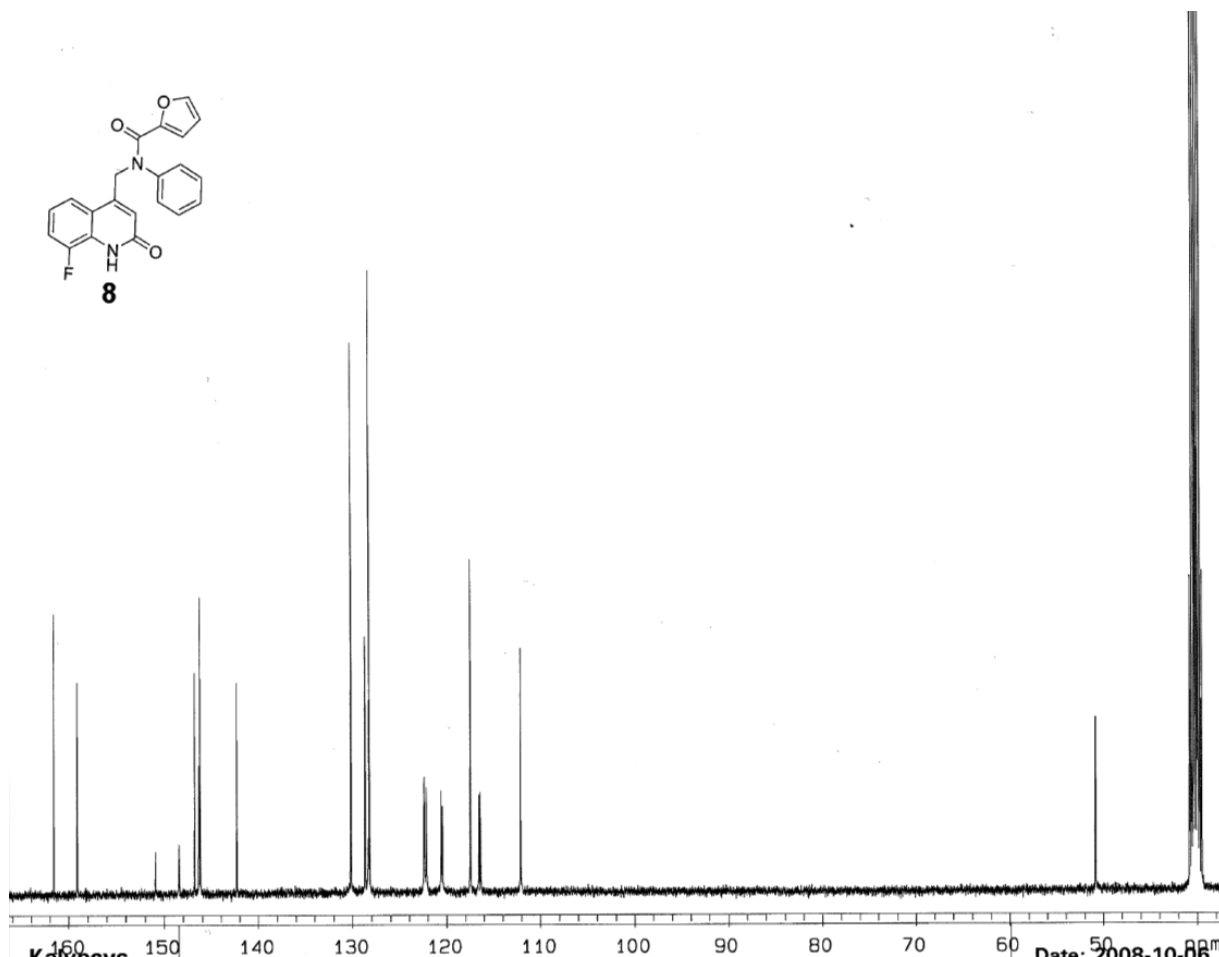

=====

Injection Date : 11/7/2007 2:08:59 PM Seq. Line : 3  
 Sample Name : Location : Vial 12  
 Acq. Operator : 14 Inj : 1  
 Acq. Instrument : Kalypsys Inj Volume : 5 µl  
 Sequence File : C:\CHEM32\1\SEQUENCE\DEF LC2.S  
 Method : C:\CHEM32\1\METHODS\1-95.LC.M  
 Last changed : 11/7/2007 1:38:18 PM by 14  
 (modified after loading)

1%-95% AcCN in H2O, .05%TFA  
 DAD1 A, Sig=254.4 Ref=360.100 (012-0301.D)

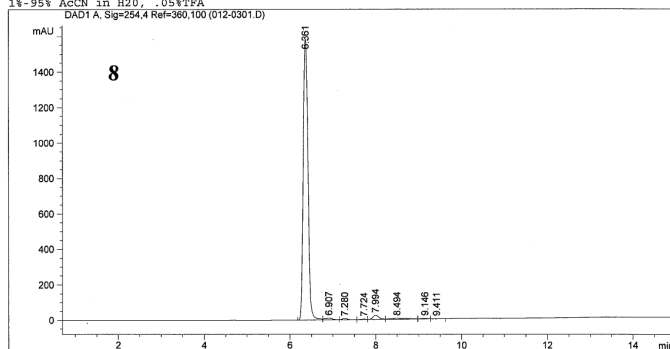

Area Percent Report

Sorted By : Signal  
 Multiplier : 1.0000  
 Dilution : 1.0000  
 Use Multiplier & Dilution Factor with ISTDs

Signal 1: DAD1 A, Sig=254.4 Ref=360.100

| Peak # | RetTime [min] | Type | Width [min] | Area [mAU*s] | Height [mAU] | Area %  |
|--------|---------------|------|-------------|--------------|--------------|---------|
| 1      | 6.361         | BB   | 0.1220      | 1.19457e4    | 1584.40552   | 94.7016 |
| 2      | 6.907         | BV   | 0.1791      | 123.90862    | 10.10421     | 0.9823  |
| 3      | 7.280         | VB   | 0.1434      | 60.59841     | 6.34656      | 0.4804  |
| 4      | 7.724         | BV   | 0.1402      | 26.92978     | 2.85120      | 0.2135  |
| 5      | 7.994         | VV   | 0.1597      | 228.49194    | 22.26974     | 1.8114  |
| 6      | 8.494         | VV   | 0.4207      | 157.33253    | 4.84718      | 1.2473  |
| 7      | 9.146         | VV   | 0.2055      | 47.70134     | 3.53321      | 0.3782  |
| 8      | 9.411         | VV   | 0.1967      | 23.38005     | 1.49335      | 0.1853  |

Totals : 1.26140e4 1635.85096

**Compound 9: 4-Methyl-N-((2-oxo-1,2-dihydroquinolin-4-yl)methyl)-N-phenylthiazole-5-carboxamide**

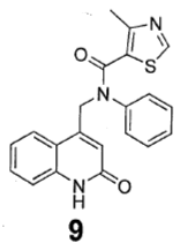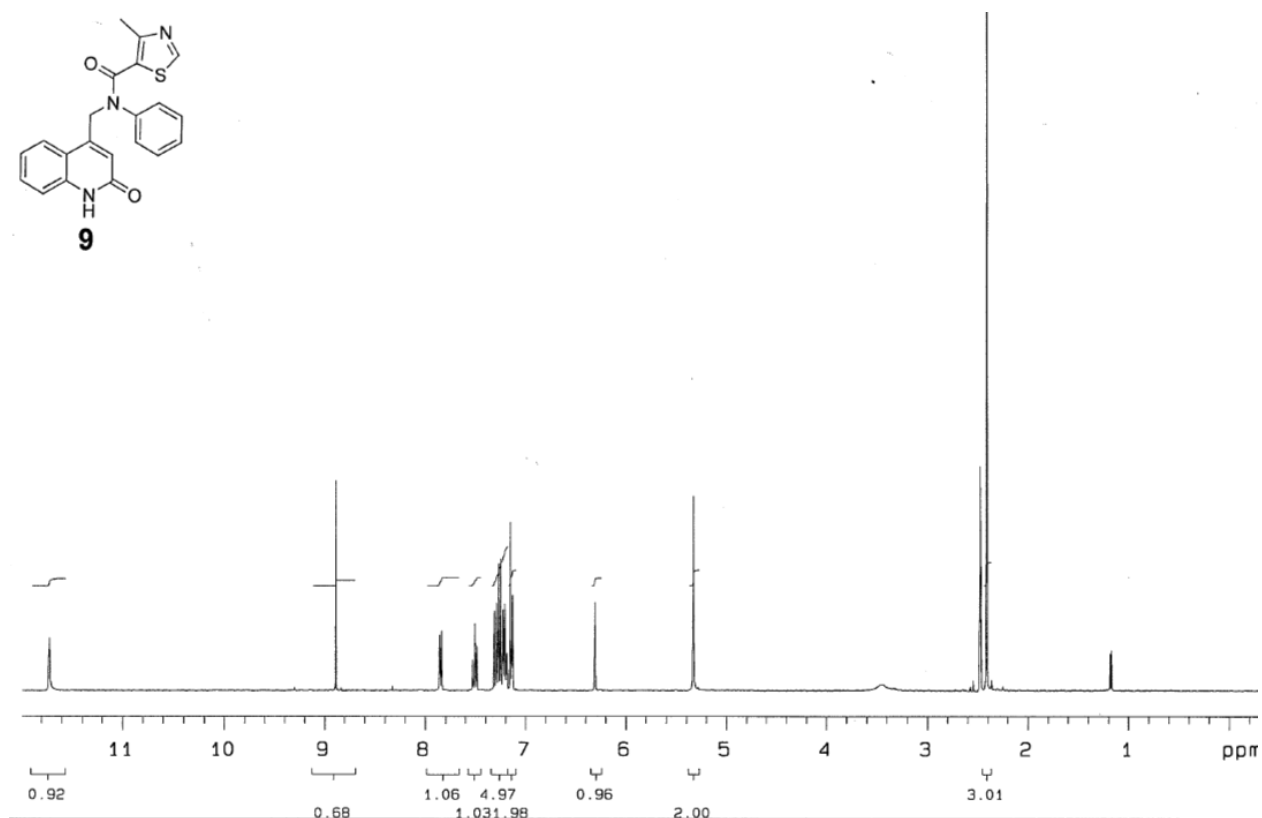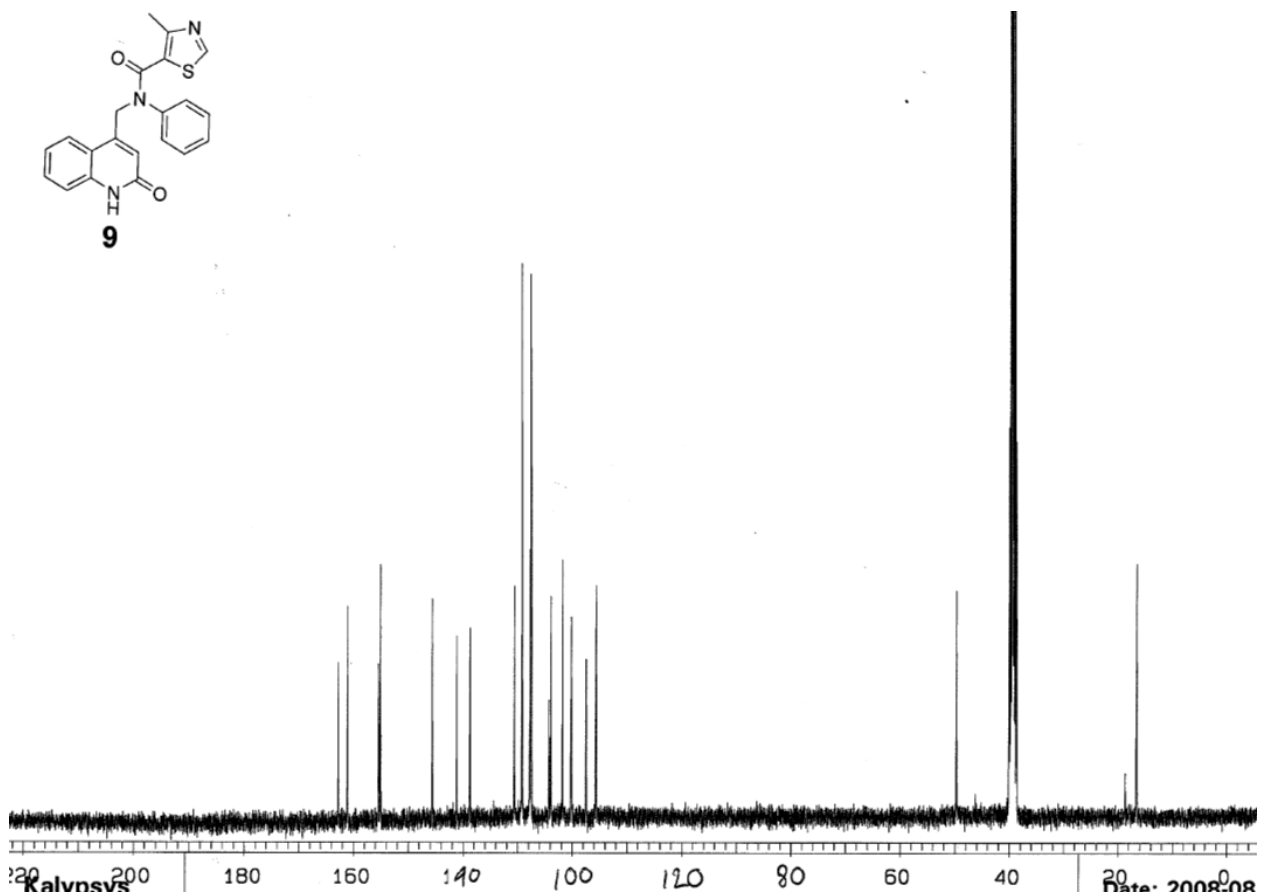

Injection Date : 11/7/2007 2:26:45 PM Seq. Line : 4  
 Sample Name : Location : Vial 13  
 Acq. Operator : 14 Inj : 1  
 Acq. Instrument : Kalypsys Inj Volume : 5 µl  
 Sequence File : C:\CHEM32\1\SEQUENCE\DEF\_LC2.S  
 Method : C:\CHEM32\1\METHODS\1-95\_LC.M  
 Last changed : 11/7/2007 1:38:18 PM by 14  
 (modified after loading)

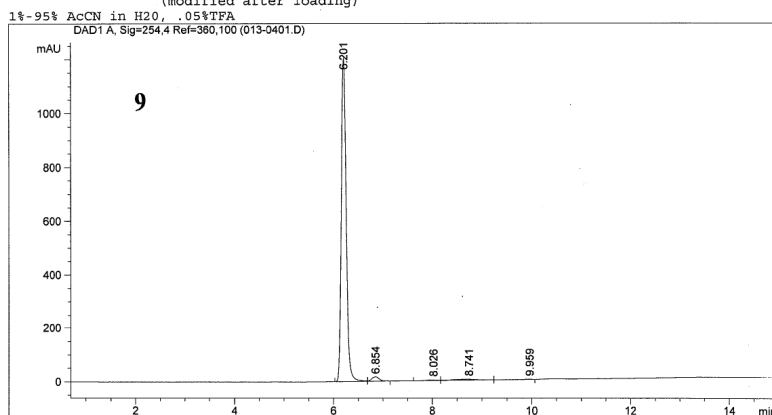

#### Area Percent Report

Sorted By : Signal  
 Multiplier : 1.0000  
 Dilution : 1.0000  
 Use Multiplier & Dilution Factor with ISTDs

Signal 1: DAD1 A, Sig=254,4 Ref=360,100

| Peak # | RetTime [min] | Type | Width [min] | Area [mAU*s] | Height [mAU] | Area %  |
|--------|---------------|------|-------------|--------------|--------------|---------|
| 1      | 6.201         | VV   | 0.1105      | 8315.13770   | 1205.21387   | 95.6283 |
| 2      | 6.854         | VB   | 0.1588      | 161.46518    | 15.85380     | 1.8569  |
| 3      | 8.026         | BV   | 0.2223      | 44.72888     | 2.68642      | 0.5144  |
| 4      | 8.741         | VV   | 0.5210      | 138.90291    | 3.26037      | 1.5975  |
| 5      | 9.959         | VV   | 0.3929      | 35.03724     | 1.07892      | 0.4029  |

Totals : 8695.27190 1228.09338

### Compound 10: *N*-((8-Fluoro-2-oxo-1,2-dihydroquinolin-4-yl)methyl)-4-methyl-*N*-phenylthiazole-5-carboxamide

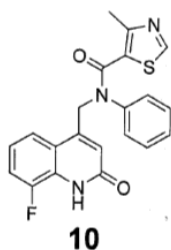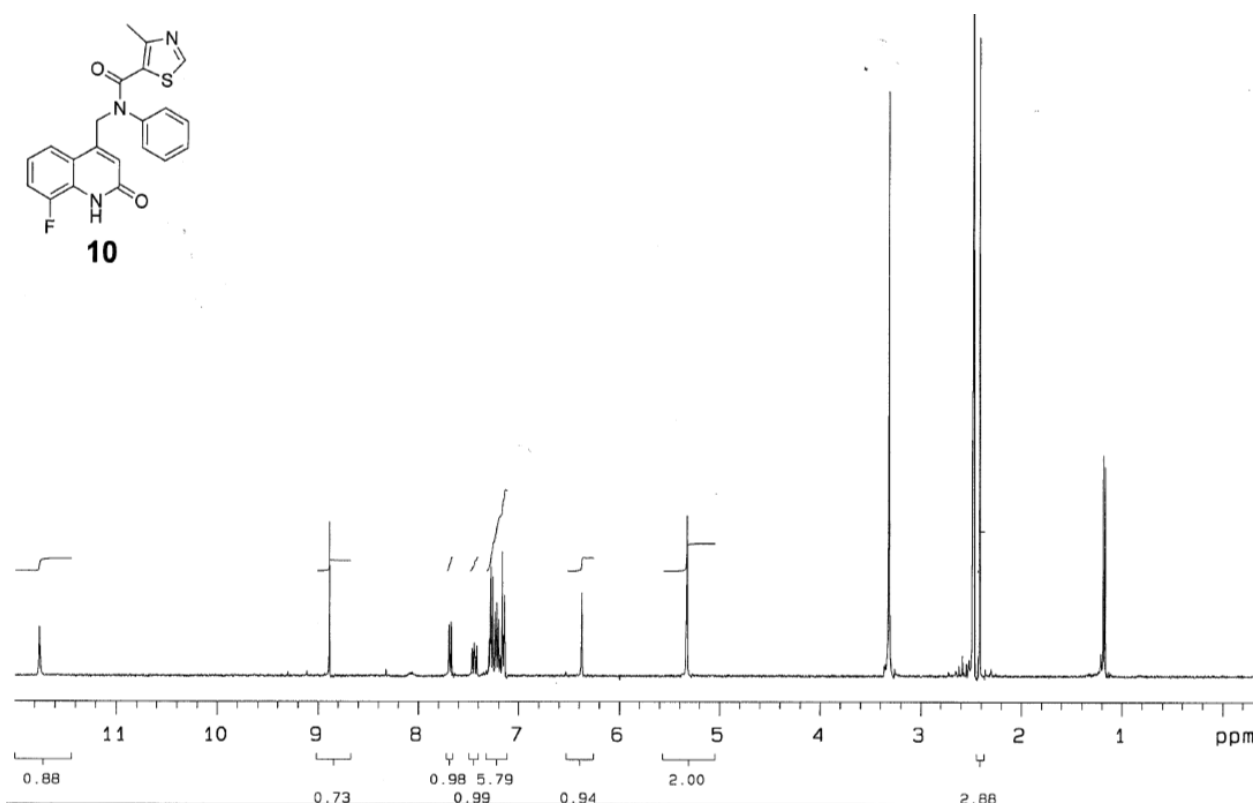



Injection Date : 11/27/2007 3:42:02 PM Seq. Line : 3  
 Sample Name : Location : Vial 2  
 Acq. Operator : 14 Inj : 1  
 Acq. Instrument : Kalypsys Inj Volume : 3 µl  
 Sequence File : C:\CHEM32\1\SEQUENCE\DEF LC2.S  
 Method : C:\CHEM32\1\METHODS\1-95.LC.M  
 Last changed : 11/27/2007 11:40:02 AM by 14  
 1%-95% AcCN in H2O, .05%TFA

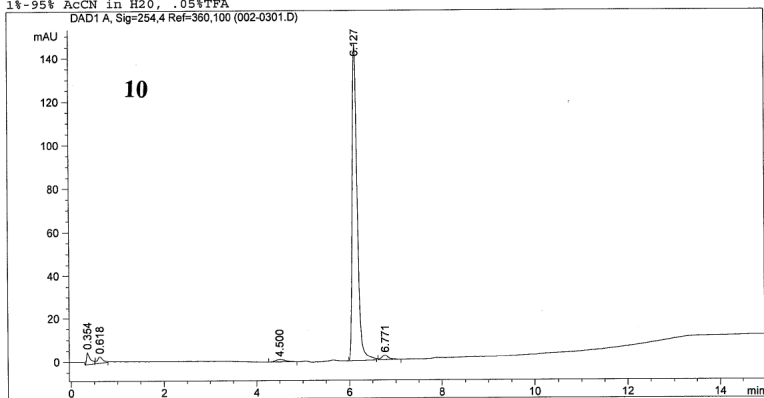

#### Area Percent Report

Sorted By : Signal  
 Multiplier : 1.0000  
 Dilution : 1.0000  
 Use Multiplier & Dilution Factor with ISTDs

Signal 1: DAD1 A, Sig=254,4 Ref=360,100

| Peak # | RetTime [min] | Type | Width [min] | Area [mAU*s] | Height [mAU] | Area %  |
|--------|---------------|------|-------------|--------------|--------------|---------|
| 1      | 0.354         | BB   | 0.0708      | 30.18667     | 5.60677      | 2.5544  |
| 2      | 0.618         | BB   | 0.1145      | 23.65251     | 2.91858      | 2.0015  |
| 3      | 4.500         | BB   | 0.2099      | 16.30085     | 1.04526      | 1.3794  |
| 4      | 6.127         | BB   | 0.1171      | 1088.91956   | 145.80655    | 92.1451 |
| 5      | 6.771         | BB   | 0.1615      | 22.68520     | 2.07612      | 1.9196  |

Totals : 1181.74478 157.45327

### Compound 11: *N*-(2-Chlorophenyl)-*N*-((8-fluoro-2-oxo-1,2-dihydroquinolin-4-yl)methyl)-4-methylthiazole-5-carboxamide

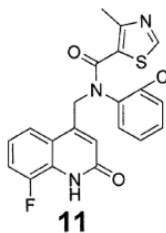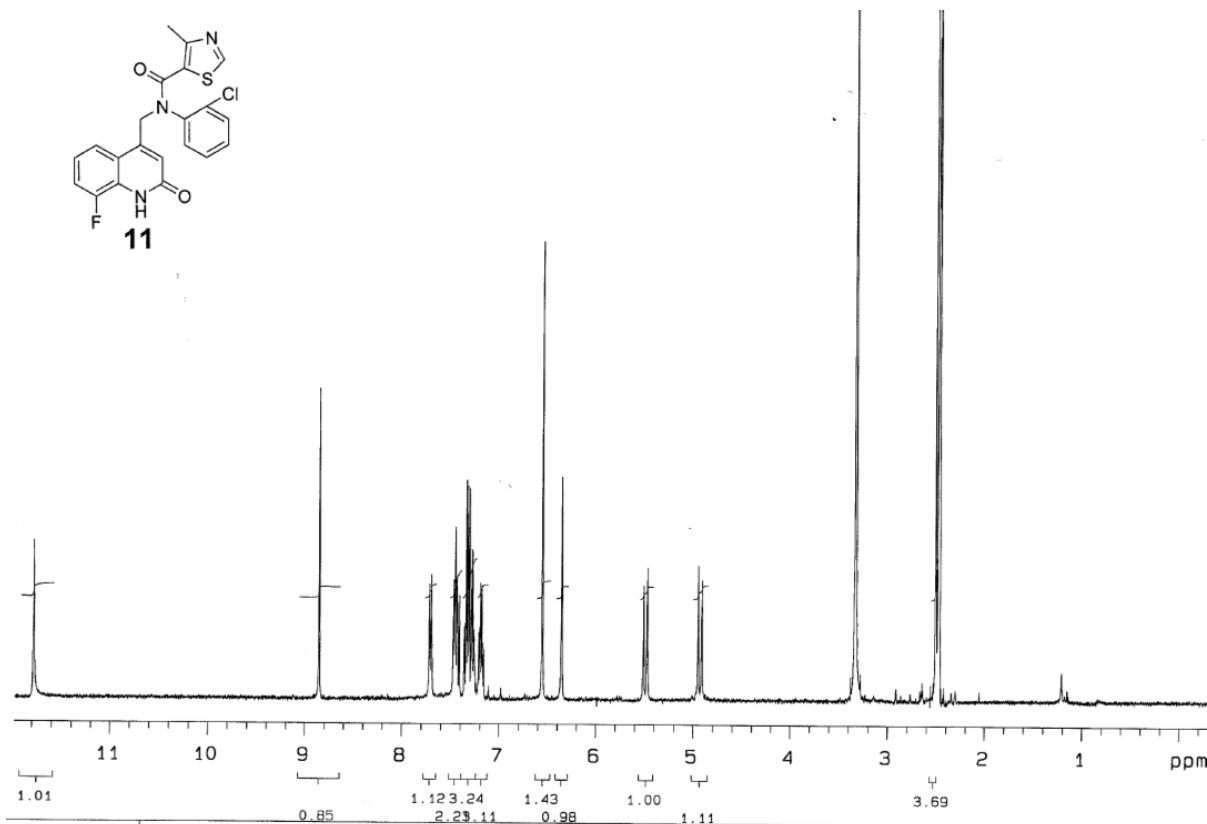

Injection Date : 11/27/2007 4:35:09 PM Seq. Line : 6  
 Sample Name : Location : Vial 3  
 Acq. Operator : 14 Inj : 1  
 Acq. Instrument : Kalypsys Inj Volume : 3 µl  
 Sequence File : C:\CHEM32\1\SEQUENCE\DEF\_LC2.S  
 Method : C:\CHEM32\1\METHODS\1-95\_LC.M  
 Last changed : 11/27/2007 11:40:02 AM by 14  
 1% 95% AcCN in H2O, .05% TFA

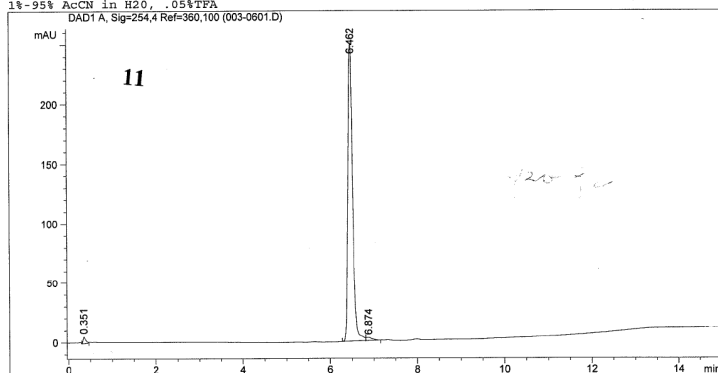

#### Area Percent Report

Sorted By : Signal  
 Multiplier : 1.0000  
 Dilution : 1.0000  
 Use Multiplier & Dilution Factor with ISTDs

Signal 1: DAD1 A, Sig=254,4 Ref=360,100

| Peak # | RetTime [min] | Type | Width [min] | Area [mAU*s] | Height [mAU] | Area %  |
|--------|---------------|------|-------------|--------------|--------------|---------|
| 1      | 0.351         | BB   | 0.0580      | 23.17265     | 5.63480      | 1.2100  |
| 2      | 6.462         | BV   | 0.1169      | 1866.23193   | 250.50536    | 97.4513 |
| 3      | 6.874         | VB   | 0.1403      | 25.63676     | 2.57253      | 1.3387  |

Totals : 1915.04134 258.71268

## Compound 12: *N*-(3-Chlorophenyl)-*N*-((8-fluoro-2-oxo-1,2-dihydroquinolin-4-yl)methyl)-4-methylthiazole-5-carboxamide

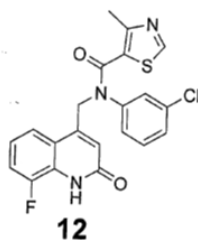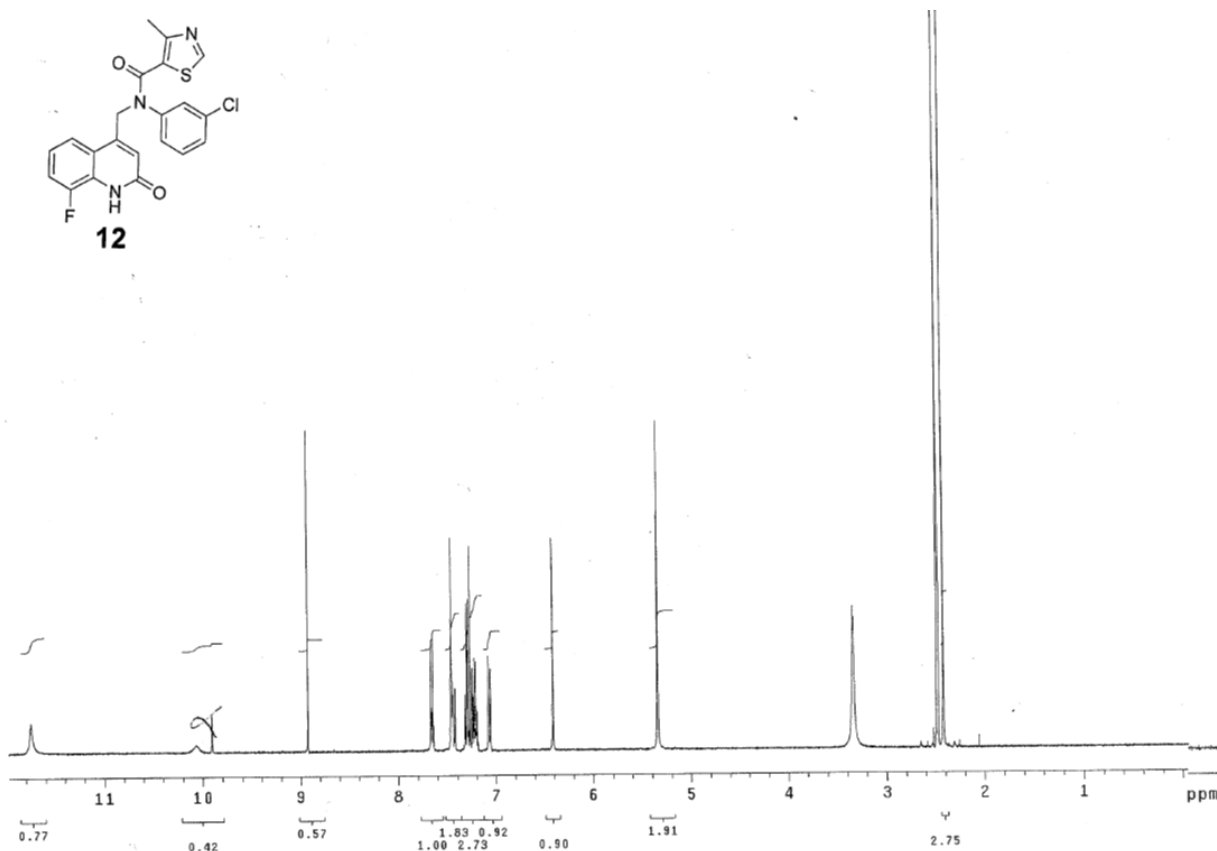

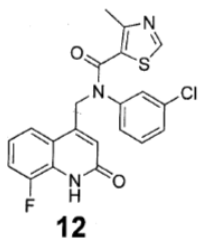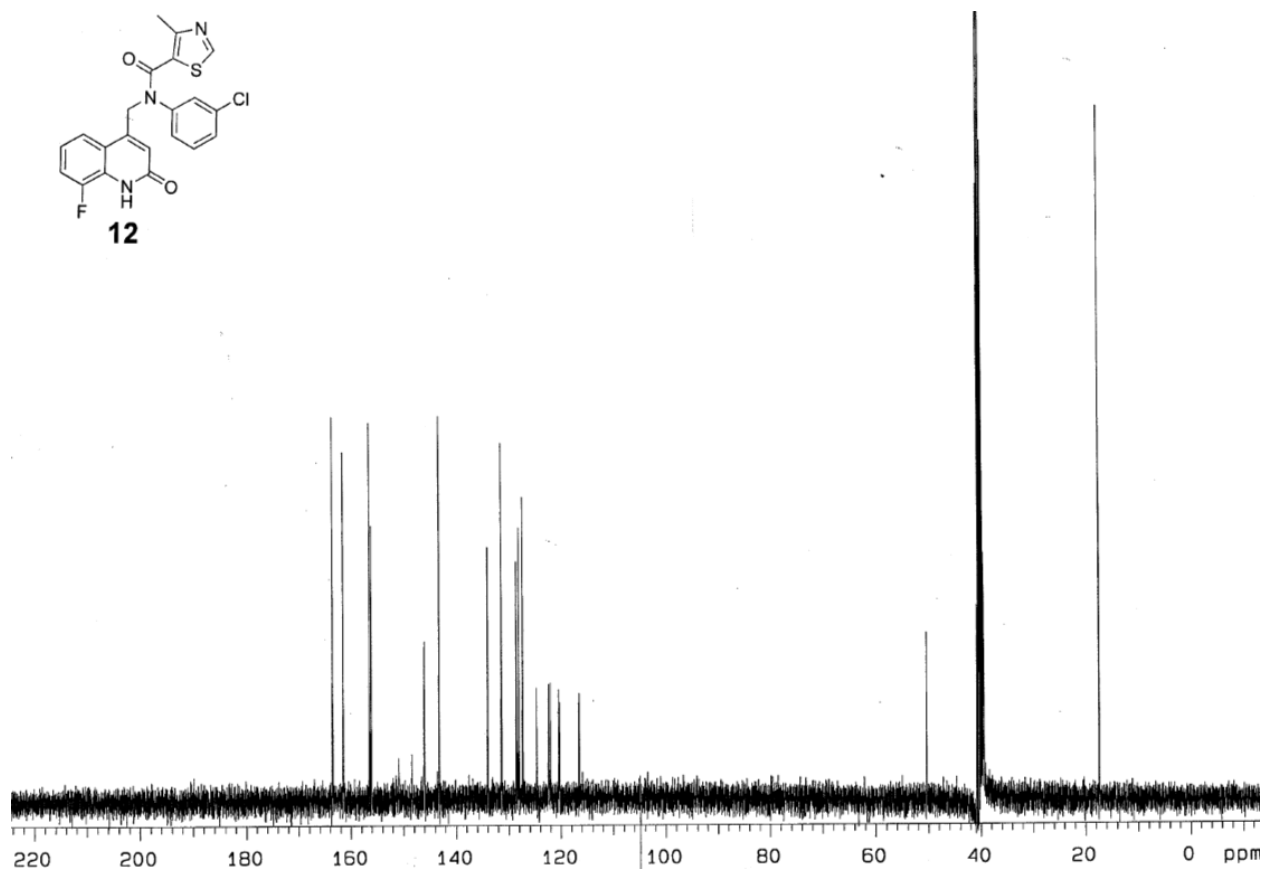

```

=====
Injection Date : 10/31/2007 4:55:38 PM      Seq. Line : 6
Sample Name    :                          Location : Vial 16
Acq. Operator  : 14                        Inj : 1
Acq. Instrument : Kalypsys                  Inj Volume : 5 µl
Sequence File  : C:\CHEM32\1\SEQUENCE\DEF_LC2.S
Method         : C:\CHEM32\1\METHODS\1-95_LC.M
Last changed   : 10/31/2007 4:08:49 PM by 14
                  (modified after loading)
  
```

1%-95% AcCN in H2O, .05%TFA

DAD1 A, Sig=254,4 Ref=360,100 (016-0601.D)

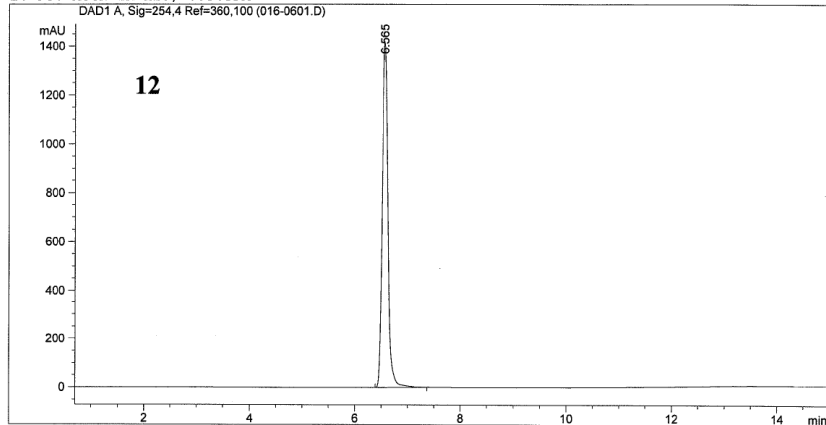

# Area Percent Report

```

=====
Sorted By      :      Signal
Multiplier     :      1.0000
Dilution       :      1.0000
Use Multiplier & Dilution Factor with ISTDs
  
```

Signal 1: DAD1 A, Sig=254,4 Ref=360,100

| Peak # | RetTime [min] | Type | Width [min] | Area [mAU*s] | Height [mAU] | Area %   |
|--------|---------------|------|-------------|--------------|--------------|----------|
| 1      | 6.565         | BB   | 0.1230      | 1.10909e4    | 1421.47742   | 100.0000 |

Totals : 1.10909e4 1421.47742

**Compound 13: N-(4-Chlorophenyl)-N-((8-fluoro-2-oxo-1,2-dihydroquinolin-4-yl)methyl)-4-methylthiazole-5-carboxamide**

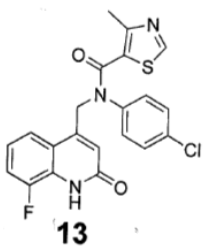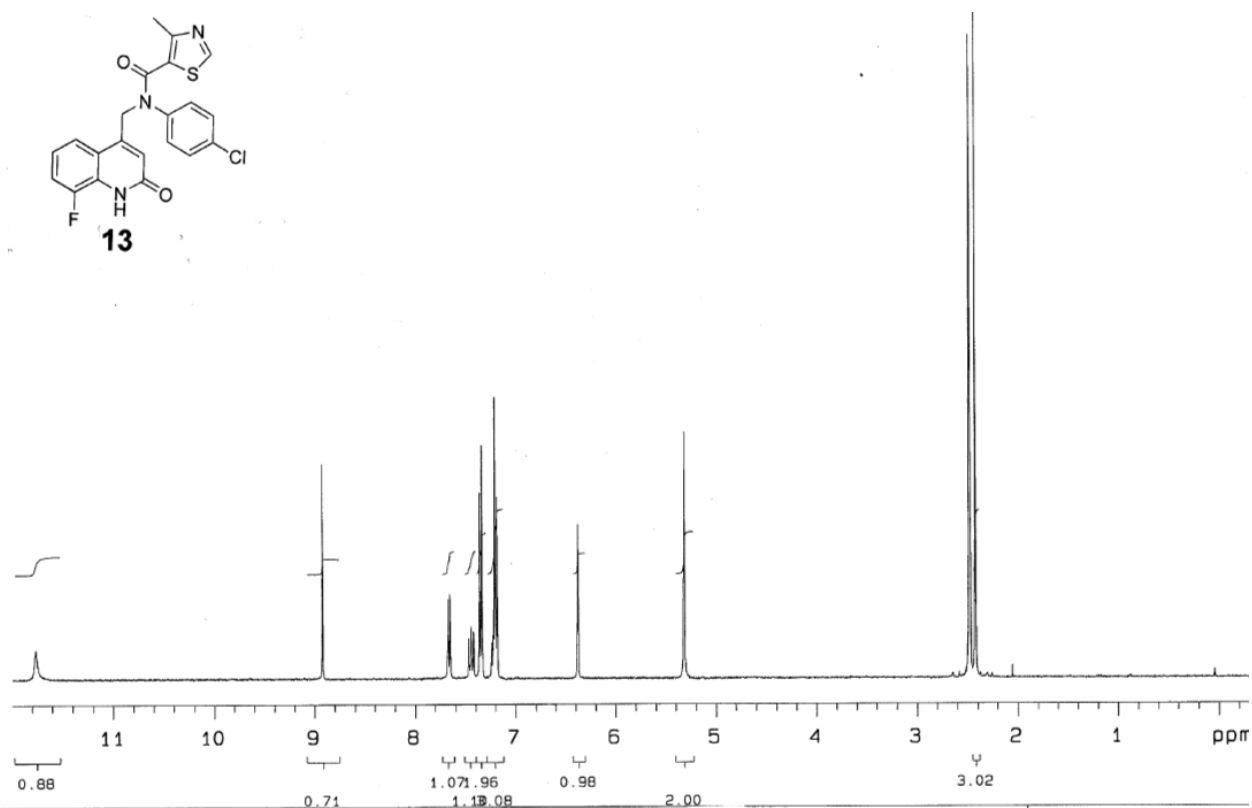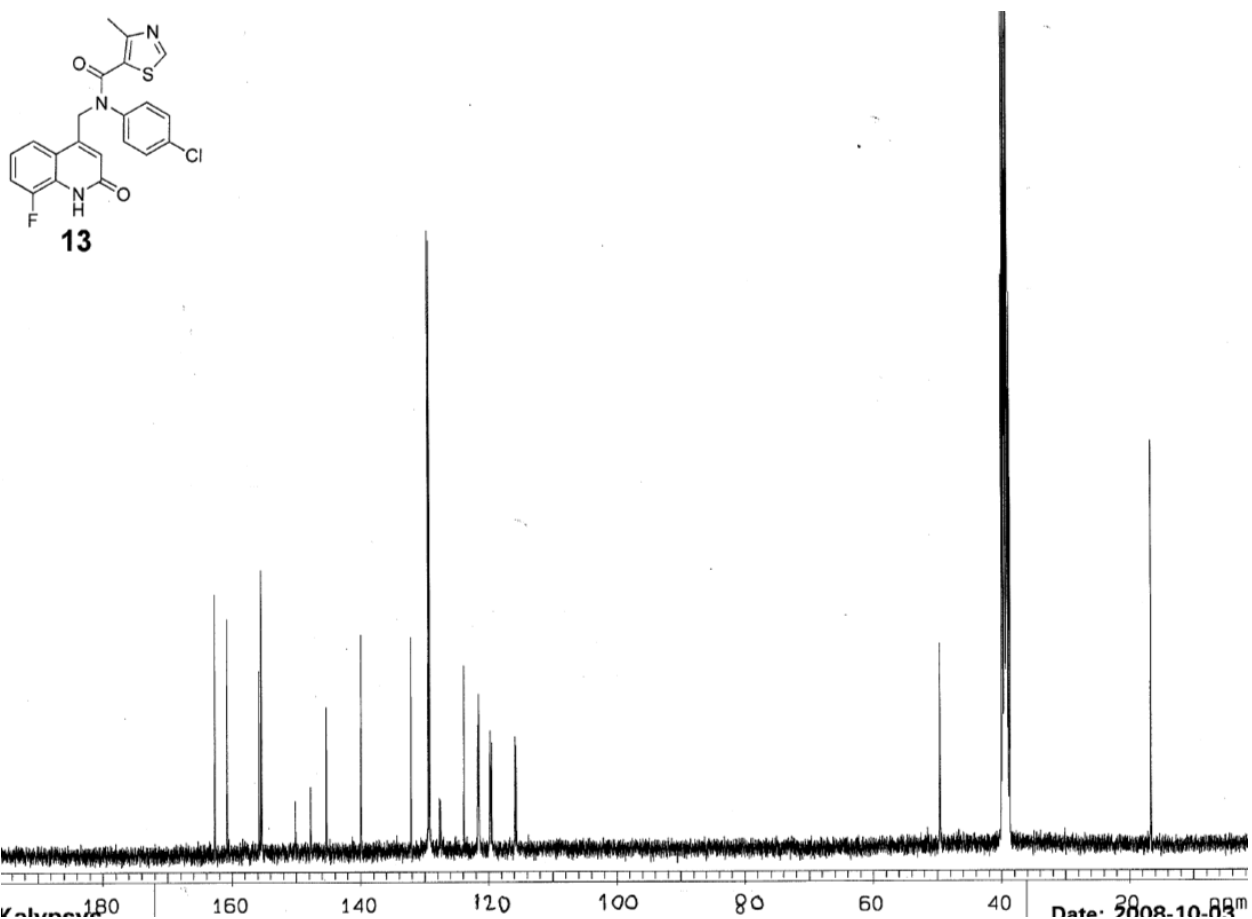

Injection Date : 10/1/2008 4:10:25 PM Seq. Line : 1  
 Sample Name : Location : Vial 21  
 Acq. Operator : 1 Inj : 1  
 Acq. Instrument : Kalypsys Inj Volume : 5 µl  
 Sequence File : C:\CHEM32\1\SEQUENCE\DEF\_LC2.S  
 Method : C:\CHEM32\1\METHODS\1-95\_LC.M  
 Last changed : 10/1/2008 4:09:37 PM by 1  
 1%-95% AcCN in H2O, .05%TFA

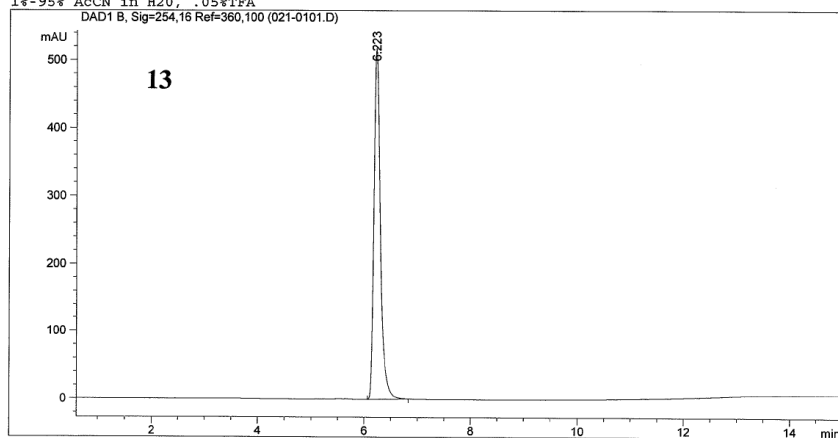

#### Area Percent Report

Sorted By : Signal  
 Multiplier : 1.0000  
 Dilution : 1.0000  
 Use Multiplier & Dilution Factor with ISTDs

Signal 1: DAD1 B, Sig=254,16 Ref=360,100

| Peak # | RetTime [min] | Type | Width [min] | Area [mAU*s] | Height [mAU] | Area %   |
|--------|---------------|------|-------------|--------------|--------------|----------|
| 1      | 6.223         | BB   | 0.1289      | 4391.39551   | 518.17761    | 100.0000 |

Totals : 4391.39551 518.17761

### Compound 14: *N*-((8-Fluoro-2-oxo-1,2-dihydroquinolin-4-yl)methyl)-*N*-(3-fluorophenyl)-4-methylthiazole-5-carboxamide

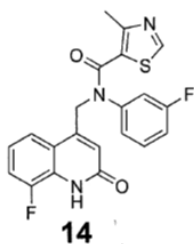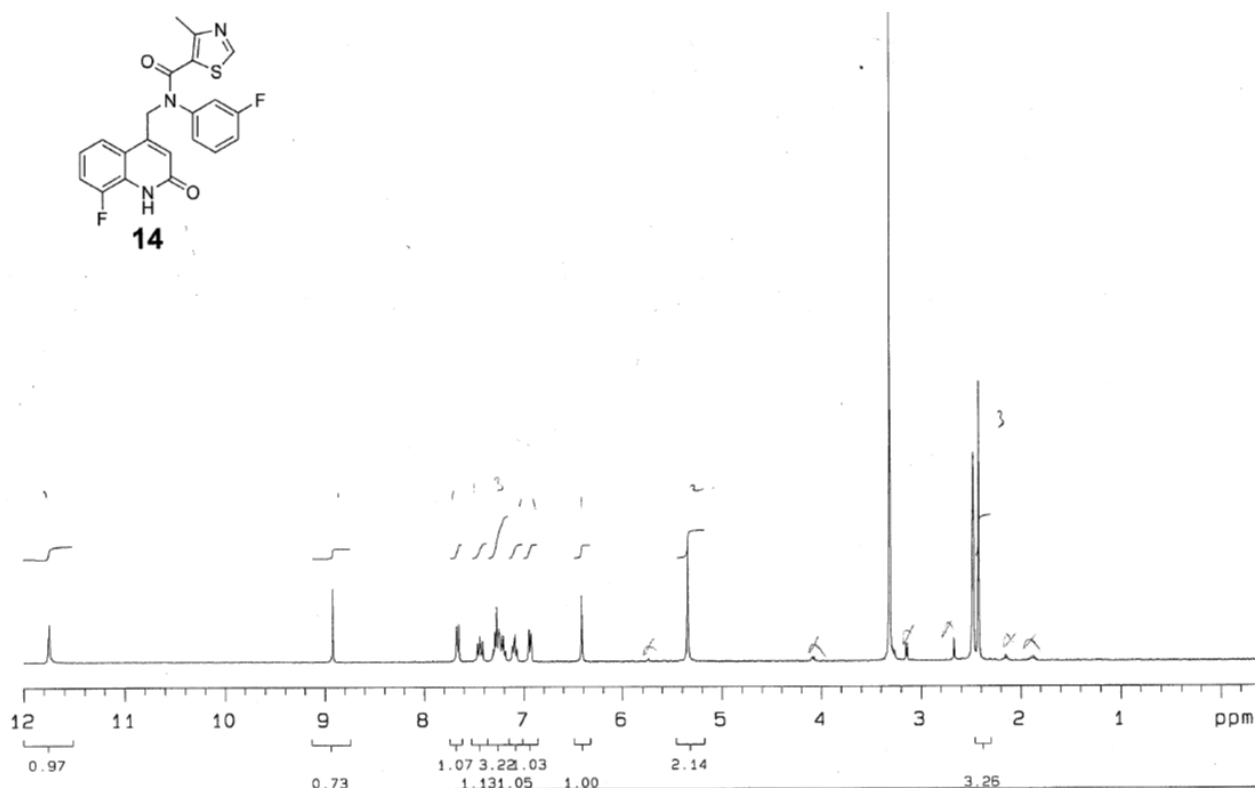

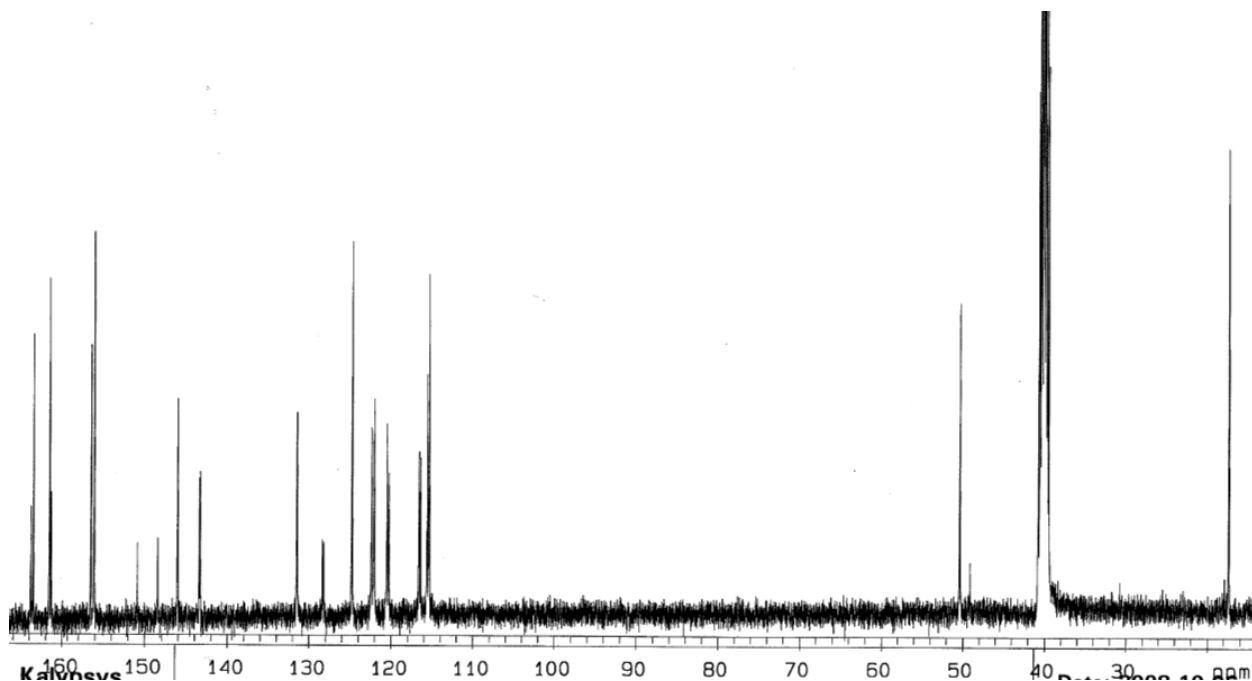

Injection Date : 9/12/2008 1:49:15 PM      Seq. Line : 1  
 Sample Name :      Location : Vial 4  
 Acq. Operator : 1      Inj : 1  
 Acq. Instrument : Kalypsys      Inj Volume : 5 µl  
 Sequence File : C:\CHEM32\1\SEQUENCE\DEF\_LC2.S  
 Method : C:\CHEM32\1\METHODS\1-95\_LC.M  
 Last changed : 9/12/2008 1:48:22 PM by 1  
 1%-95% AcCN in H2O, .05%TFA

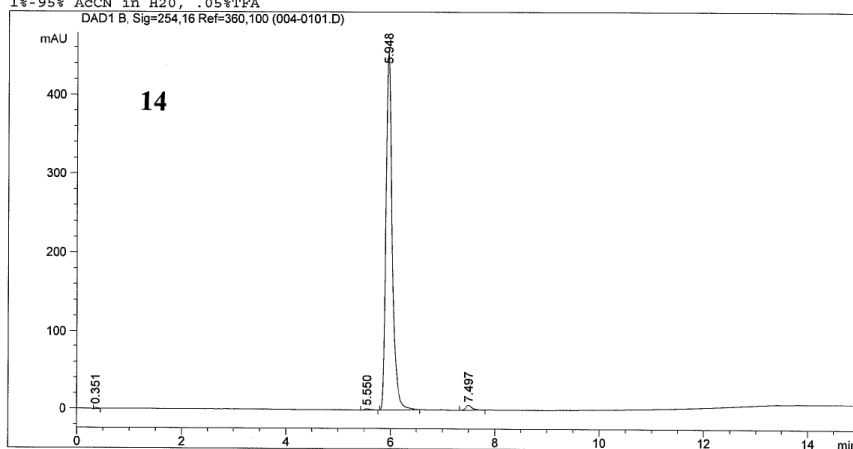

# Area Percent Report

Sorted By : Signal  
 Multiplier : 1.0000  
 Dilution : 1.0000  
 Use Multiplier & Dilution Factor with ISTDs

Signal 1: DAD1 B, Sig=254,16 Ref=360,100

| Peak # | RetTime [min] | Type | Width [min] | Area [mAU*s] | Height [mAU] | Area %  |
|--------|---------------|------|-------------|--------------|--------------|---------|
| 1      | 0.351         | BB   | 0.0617      | 8.05800      | 1.81914      | 0.2081  |
| 2      | 5.550         | BB   | 0.1198      | 13.38379     | 1.66535      | 0.3456  |
| 3      | 5.948         | BB   | 0.1249      | 3795.24316   | 457.13010    | 97.9946 |
| 4      | 7.497         | BB   | 0.1411      | 56.22499     | 6.12265      | 1.4518  |

Totals : 3872.90994 466.73725

**Compound 15: N-(3-Cyanophenyl)-N-((8-fluoro-2-oxo-1,2-dihydroquinolin-4-yl)methyl)-4-methylthiazole-5-carboxamide**

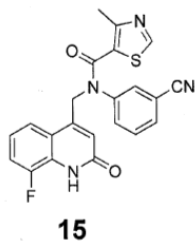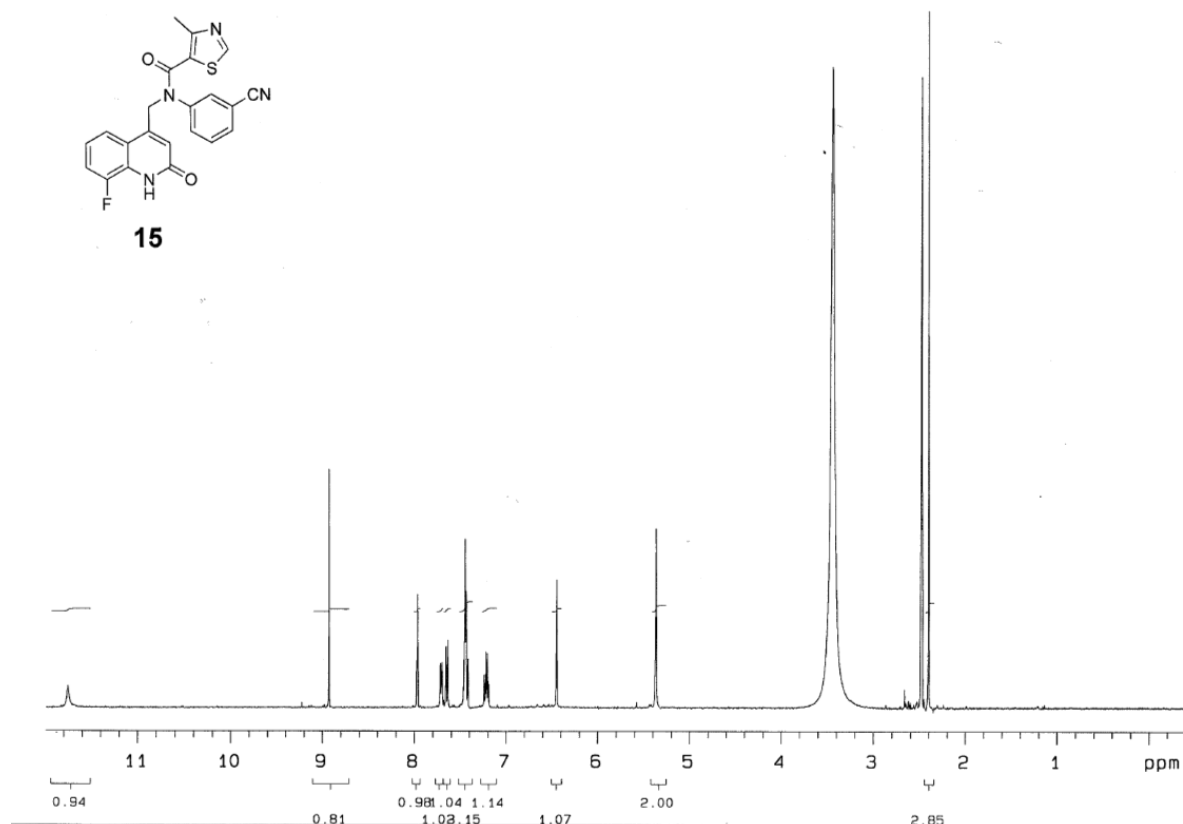

=====  
Injection Date : 11/27/2007 5:10:29 PM Seq. Line : 8  
Sample Name : Location : Vial 5  
Acq. Operator : 14 Inj : 1  
Acq. Instrument : Kalypsys Inj Volume : 3 µl  
Sequence File : C:\CHEM32\1\SEQUENCE\DEF\_LC2.S  
Method : C:\CHEM32\1\METHODS\1-95\_LC.M  
Last changed : 11/27/2007 11:40:02 AM by 14  
1%-95% AcCN in H2O, .05%TFA  
DAD1 A, Sig=254,4 Ref=360,100 (005-0801.D)

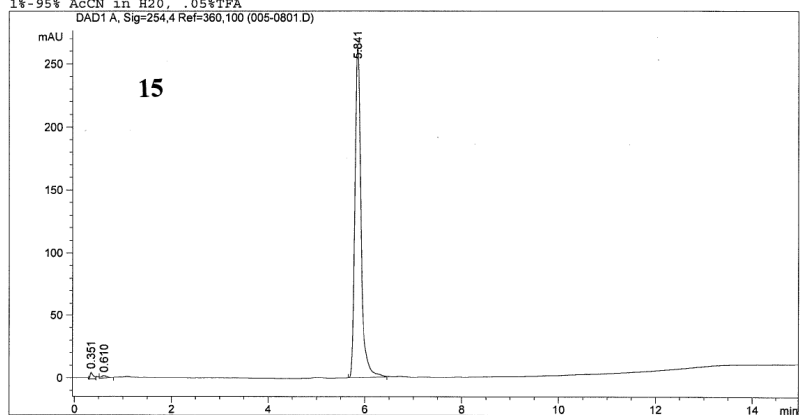

=====  
Area Percent Report  
=====

Sorted By : Signal  
Multiplier : 1.0000  
Dilution : 1.0000  
Use Multiplier & Dilution Factor with ISTDs

Signal 1: DAD1 A, Sig=254,4 Ref=360,100

| Peak # | RetTime [min] | Type | Width [min] | Area [mAU*s] | Height [mAU] | Area %  |
|--------|---------------|------|-------------|--------------|--------------|---------|
| 1      | 0.351         | BB   | 0.0616      | 25.06884     | 5.67219      | 1.0586  |
| 2      | 0.610         | BB   | 0.1147      | 18.22931     | 2.19980      | 0.7698  |
| 3      | 5.841         | BB   | 0.1372      | 2324.79004   | 262.91180    | 98.1716 |

Totals : 2368.08819 270.78378

**Compound 16: N-(3-Methylphenyl)-N-((8-fluoro-2-oxo-1,2-dihydroquinolin-4-yl)methyl)-4-methylthiazole-5-carboxamide**

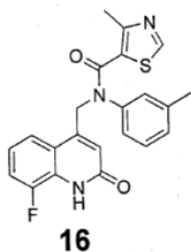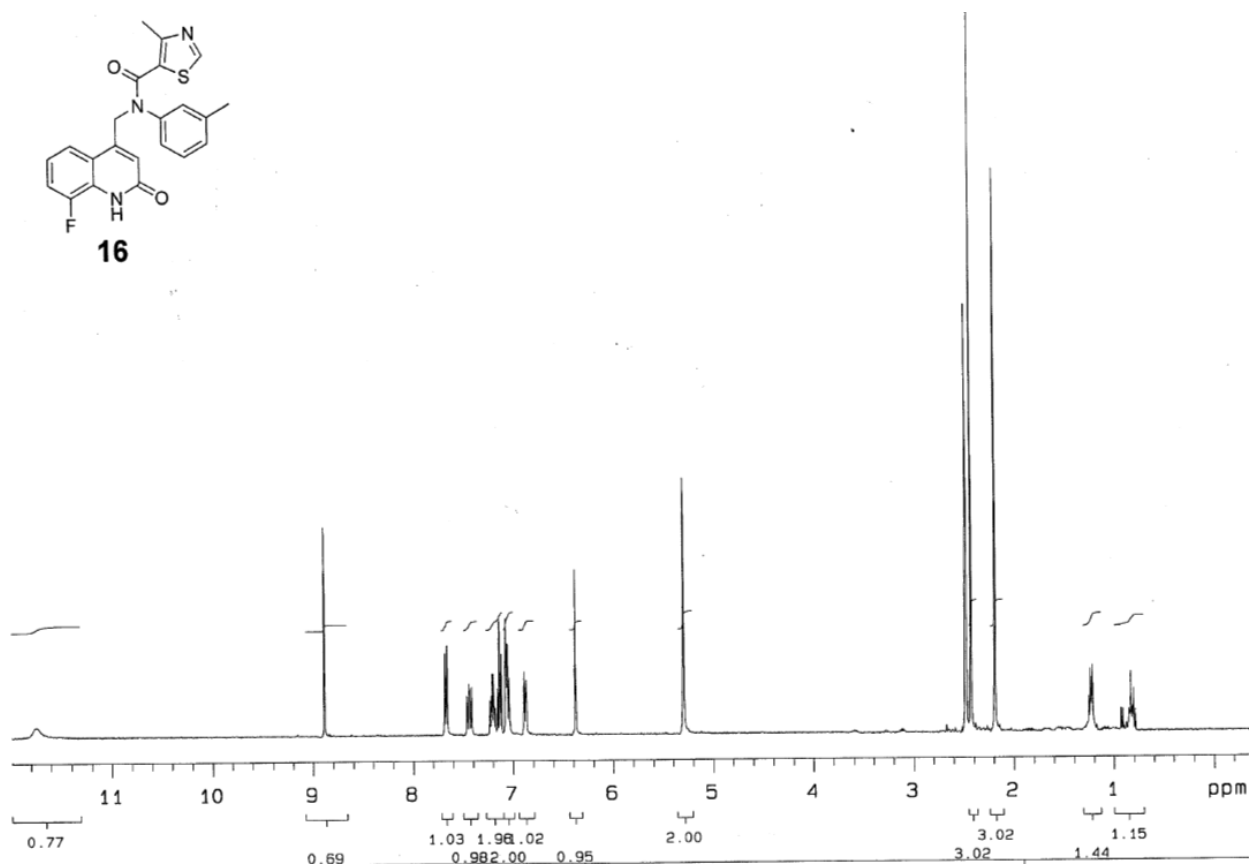

Injection Date : 10/1/2008 5:18:45 PM Seq. Line : 5  
Sample Name : Location : Vial 25  
Acq. Operator : 1 Inj : 1  
Acq. Instrument : Kalypsys Inj Volume : 5 µl  
Sequence File : C:\CHEM32\1\SEQUENCE\DEF\_LC2.S  
Method : C:\CHEM32\1\METHODS\1-95\_LC.M  
Last changed : 10/1/2008 4:09:37 PM by 1  
1%-95% AcCN in H2O, .05%TFA

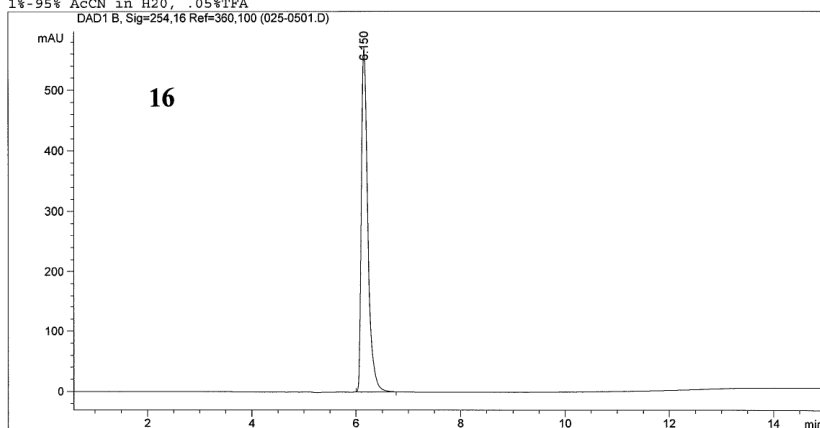

**Area Percent Report**

Sorted By : Signal  
Multiplier : 1.0000  
Dilution : 1.0000  
Use Multiplier & Dilution Factor with ISTDs

Signal 1: DAD1 B, Sig=254,16 Ref=360,100

| Peak # | RetTime [min] | Type | Width [min] | Area [mAU*s] | Height [mAU] | Area %   |
|--------|---------------|------|-------------|--------------|--------------|----------|
| 1      | 6.150         | BB   | 0.1320      | 4889.76270   | 570.37274    | 100.0000 |

Totals : 4889.76270 570.37274



**Compound 17: *N*-(3-Methoxyphenyl)-*N*-((8-fluoro-2-oxo-1,2-dihydroquinolin-4-yl)methyl)-4-methylthiazole-5-carboxamide**

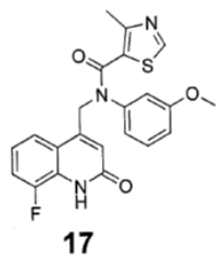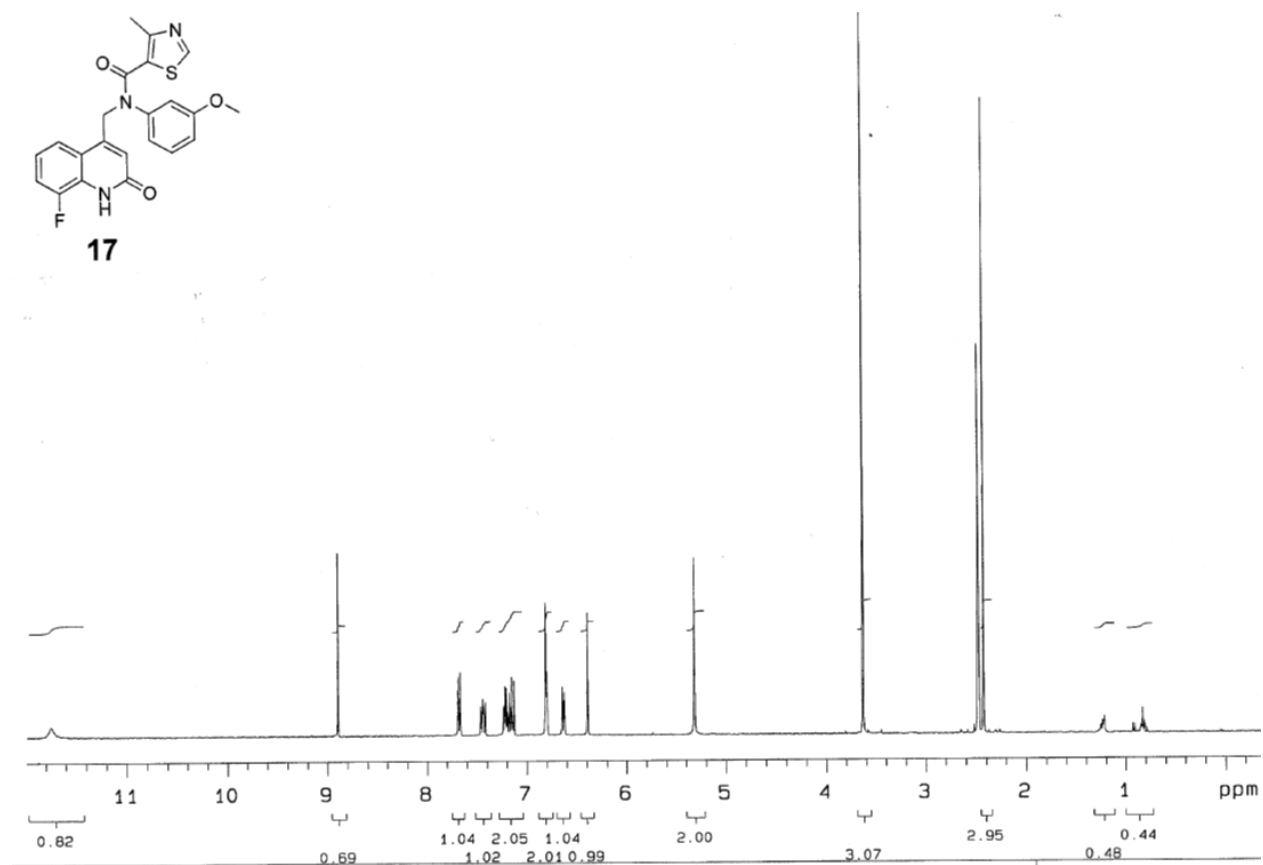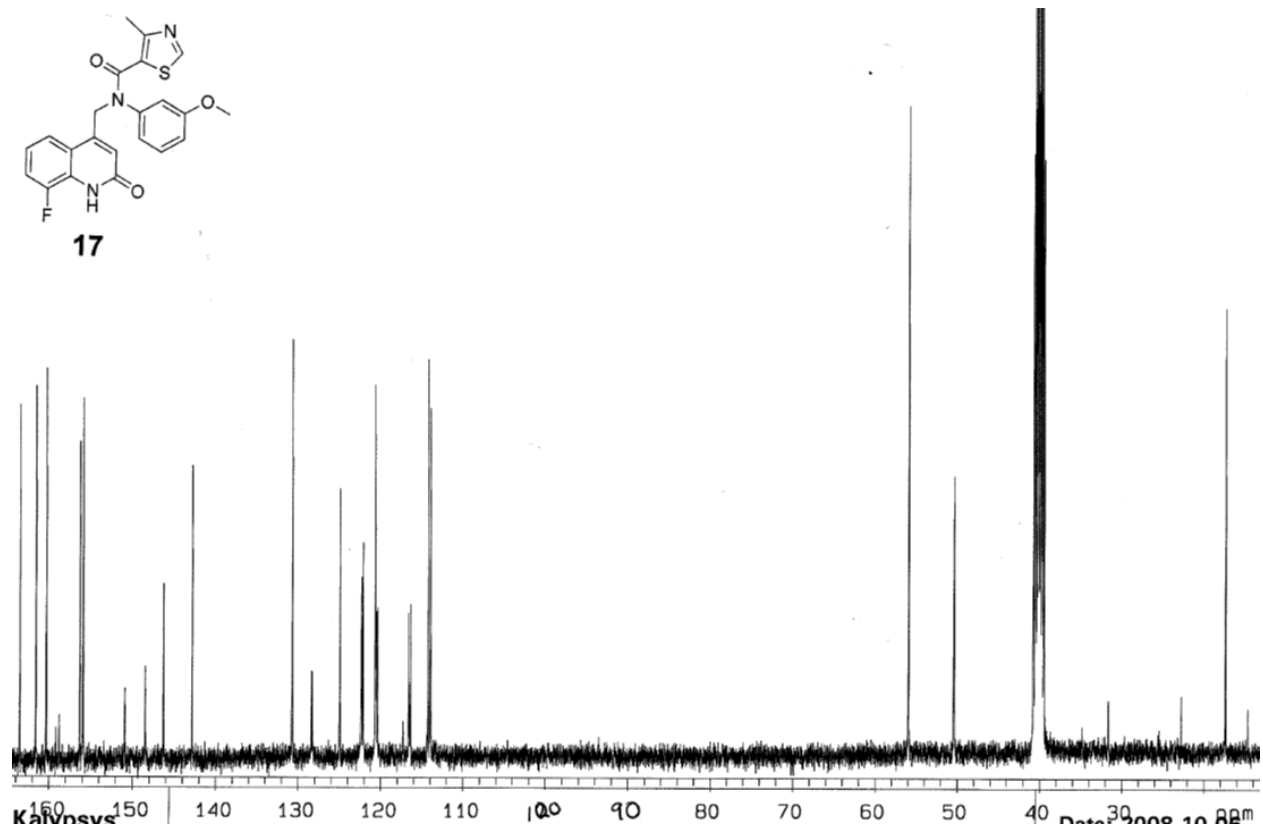

```

=====
Injection Date   : 10/1/2008 5:01:39 PM      Seq. Line :    4
Sample Name     :                               Location : Vial 24
Acq. Operator   : 1                               Inj :    1
Acq. Instrument : Kalypsys                      Inj Volume : 5 µl
Sequence File   : C:\CHEM32\1\SEQUENCE\DEF_LC2.S
Method          : C:\CHEM32\1\METHODS\1-95_LC.M
Last changed    : 10/1/2008 4:09:37 PM by 1
1%-95% AcCN in H2O, .05%TFA

```

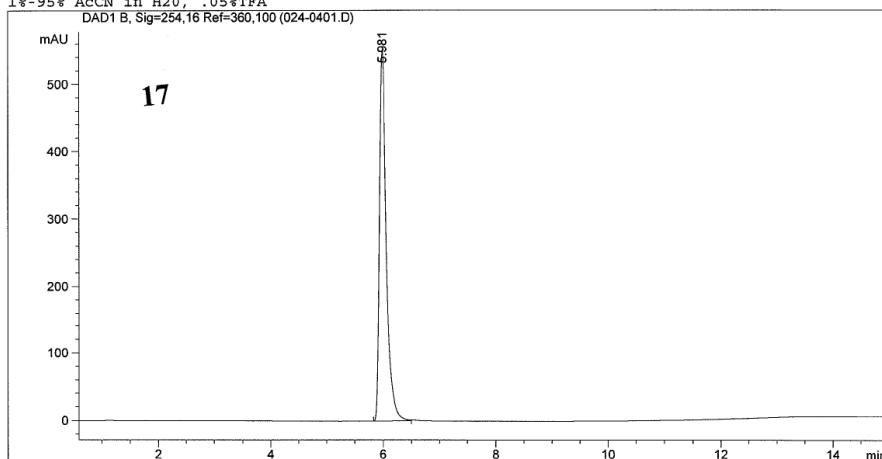

Area Percent Report

```

=====
Sorted By      :      Signal
Multiplier     :      1.0000
Dilution       :      1.0000
Use Multiplier & Dilution Factor with ISTDs

```

Signal 1: DAD1 B, Sig=254,16 Ref=360,100

| Peak # | RetTime [min] | Type | Width [min] | Area [mAU*s] | Height [mAU] | Area %   |
|--------|---------------|------|-------------|--------------|--------------|----------|
| 1      | 5.981         | BB   | 0.1301      | 4735.00977   | 552.03058    | 100.0000 |

Totals :                      4735.00977   552.03058

**Compound 18: *N*-(3-Chlorophenyl)-*N*-((8-fluoro-2-oxo-1,2-dihydroquinolin-4-yl)methyl)thiazole-5-carboxamide**

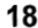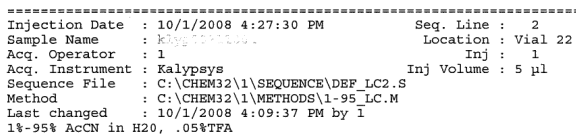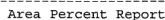

```
Sorted By      :      Signal
Multiplier    :      1.0000
Dilution      :      1.0000
Use Multiplier & Dilution Factor with ISTDs
```

Signal 1: DAD1 B, Sig=254,16 Ref=360,100

| Peak # | RetTime [min] | Type | Width [min] | Area [mAU*s] | Height [mAU] | Area %  |
|--------|---------------|------|-------------|--------------|--------------|---------|
| 1      | 5.757         | BB   | 0.1324      | 23.04755     | 2.67786      | 1.3293  |
| 2      | 6.140         | BB   | 0.1267      | 1685.81738   | 191.56599    | 97.2305 |
| 3      | 6.857         | BV   | 0.0829      | 10.52154     | 1.73202      | 0.6068  |
| 4      | 6.968         | VV   | 0.0937      | 9.06845      | 1.39767      | 0.5230  |
| 5      | 7.087         | BV   | 0.0734      | 5.38075      | 1.02166      | 0.3103  |

|          |            |           |
|----------|------------|-----------|
| Totals : | 1733.83567 | 198.39520 |
|----------|------------|-----------|

## Page 35 of 82

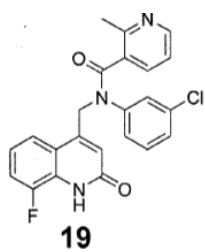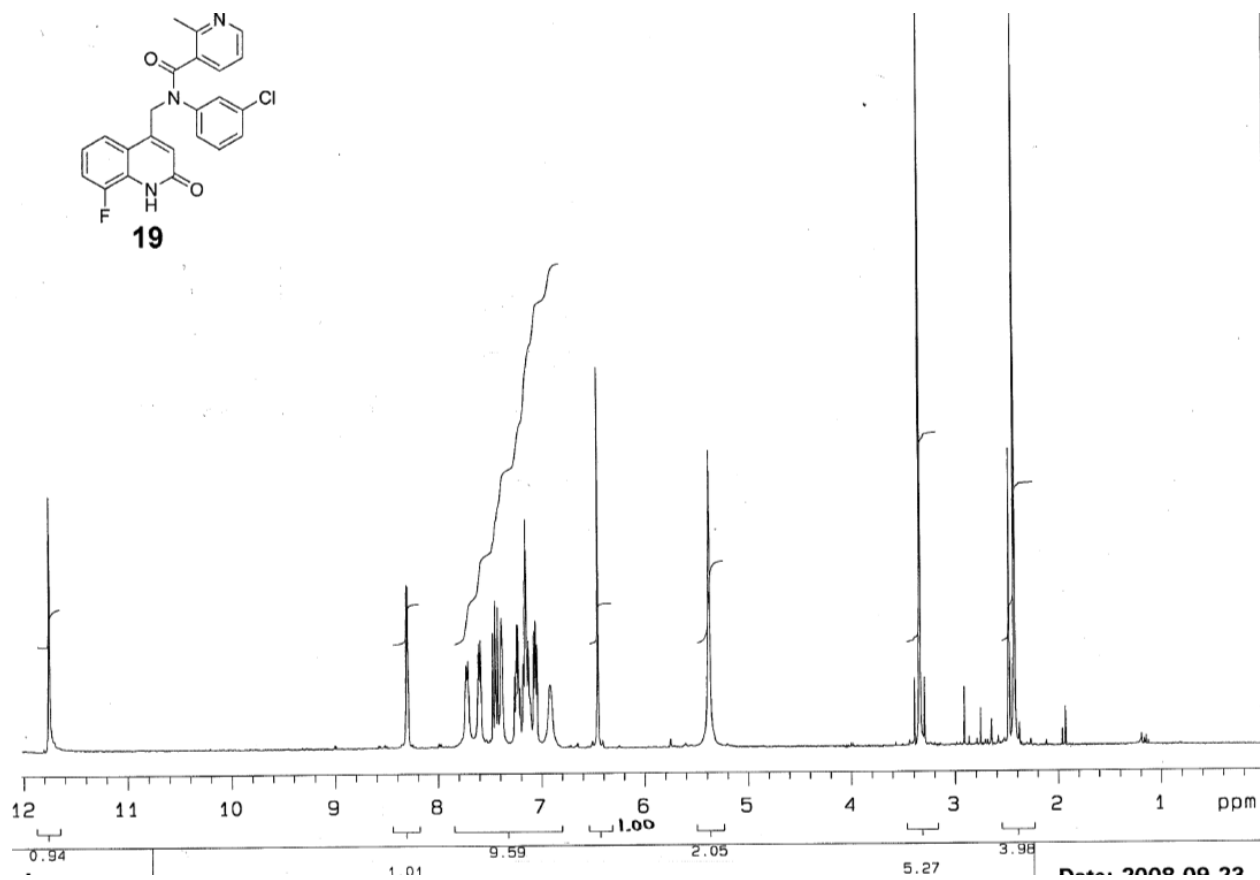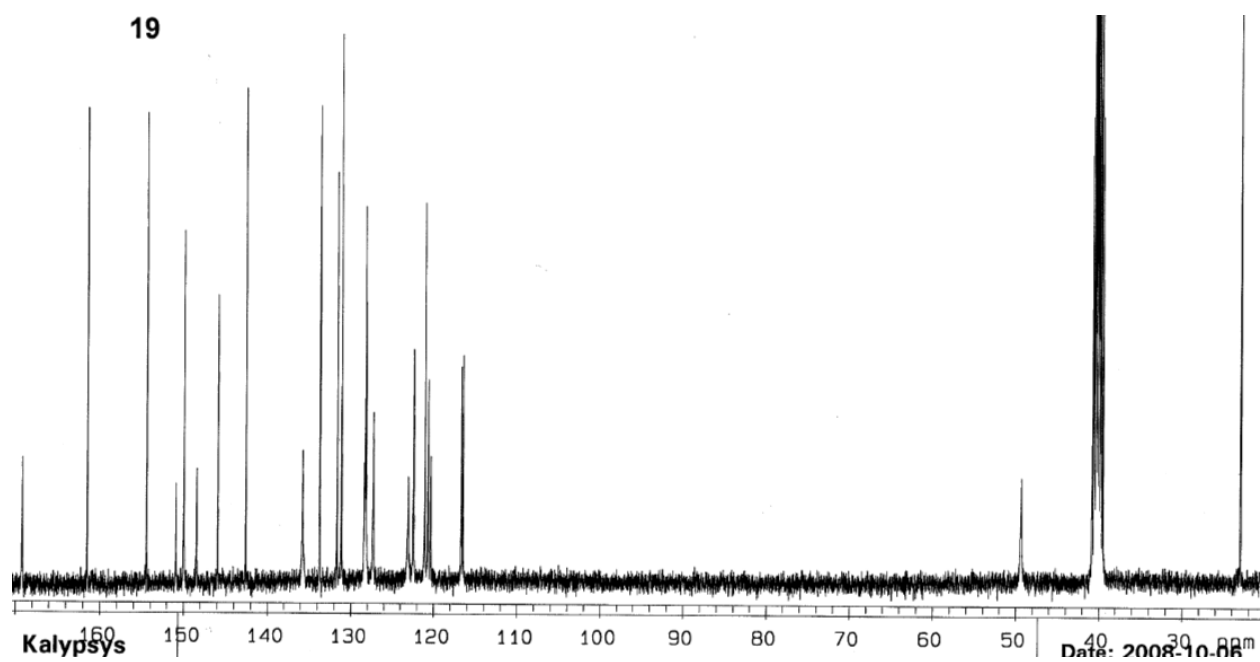

DAD1 A, Sig=254,4 Ref=360,100 (003-0101.D)

19

5.088

6.855

mAU

0 50 100 150 200 250 300 350 400

0 2 4 6 8 10 12 14 min

```
Sorted By      :      Signal
Multiplier    :      1.0000
Dilution      :      1.0000
Use Multiplier & Dilution Factor with ISTDs
```

| Peak # | RetTime [min] | Type | Width [min] | Area [mAU*s] | Height [mAU] | Area %  |
|--------|---------------|------|-------------|--------------|--------------|---------|
| 1      | 0.350         | BB   | 0.0633      | 9.55625      | 2.01589      | 0.2243  |
| 2      | 5.088         | BB   | 0.1527      | 4193.13330   | 426.41476    | 98.3991 |
| 3      | 6.855         | VB   | 0.1300      | 58.66541     | 6.22083      | 1.3767  |

|          |            |           |
|----------|------------|-----------|
| Totals : | 4261.35497 | 434.65149 |
|----------|------------|-----------|

# **methylisonicotinamide**

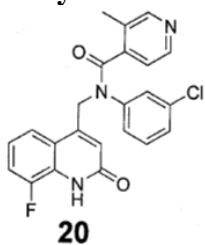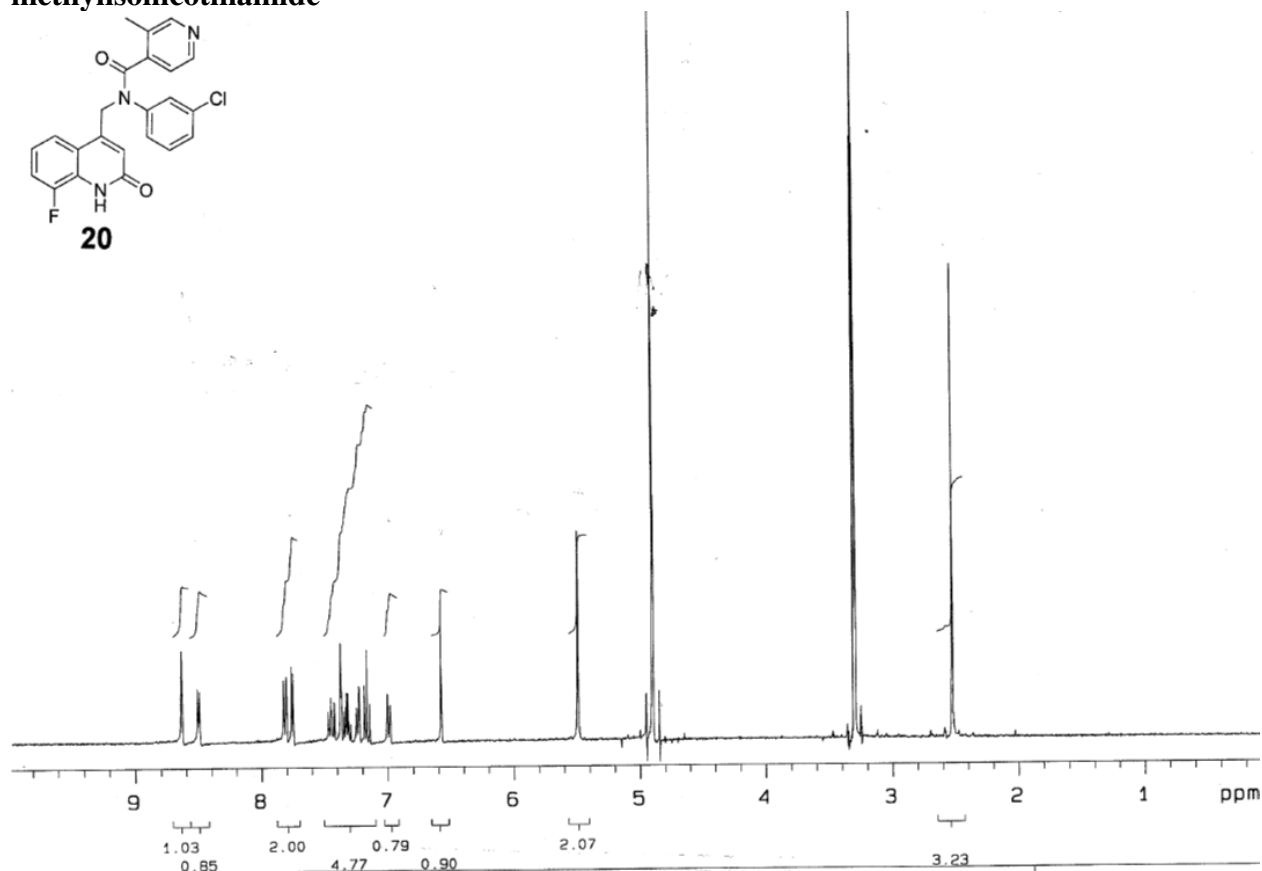

Injection Date : 9/17/2008 3:48:29 PM Seq. Line : 1  
 Sample Name : 000000000000 Location : Vial 12  
 Acq. Operator : 1 Inj : 1  
 Acq. Instrument : Kalypsys Inj Volume : 5 µl  
 Sequence File : C:\CHEM32\1\SEQUENCE\DEF\_LC2.S  
 Method : C:\CHEM32\1\METHODS\1-95\_LC.M  
 Last changed : 9/17/2008 3:45:51 PM by 1  
 1%-95% AcCN in H2O, .05%TFA

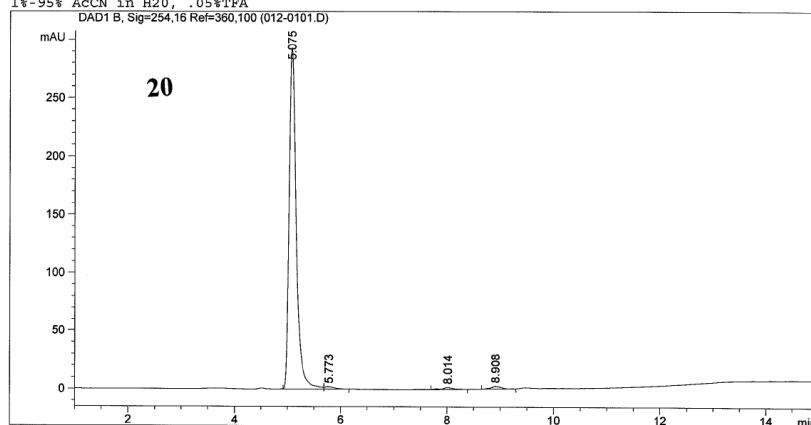

## **Area Percent Report**

Sorted By : Signal  
 Multiplier : 1.0000  
 Dilution : 1.0000  
 Use Multiplier & Dilution Factor with ISTDs

Signal 1: DAD1 B, Sig=254,16 Ref=360,100

| Peak # | RetTime [min] | Type | Width [min] | Area [mAU*s] | Height [mAU] | Area %  |
|--------|---------------|------|-------------|--------------|--------------|---------|
| 1      | 5.075         | BV   | 0.1425      | 2732.61450   | 293.73938    | 97.0194 |
| 2      | 5.773         | VB   | 0.1941      | 27.88361     | 2.05772      | 0.9900  |
| 3      | 8.014         | BB   | 0.2333      | 25.16622     | 1.55136      | 0.8935  |
| 4      | 8.908         | BB   | 0.1801      | 30.89947     | 2.33886      | 1.0971  |

Totals : 2816.56381 299.68731

**Compound 21: N-(3-Chlorophenyl)-N-((8-fluoro-2-oxo-1,2-dihydroquinolin-4-yl)methyl)-4-methylnicotinamide**

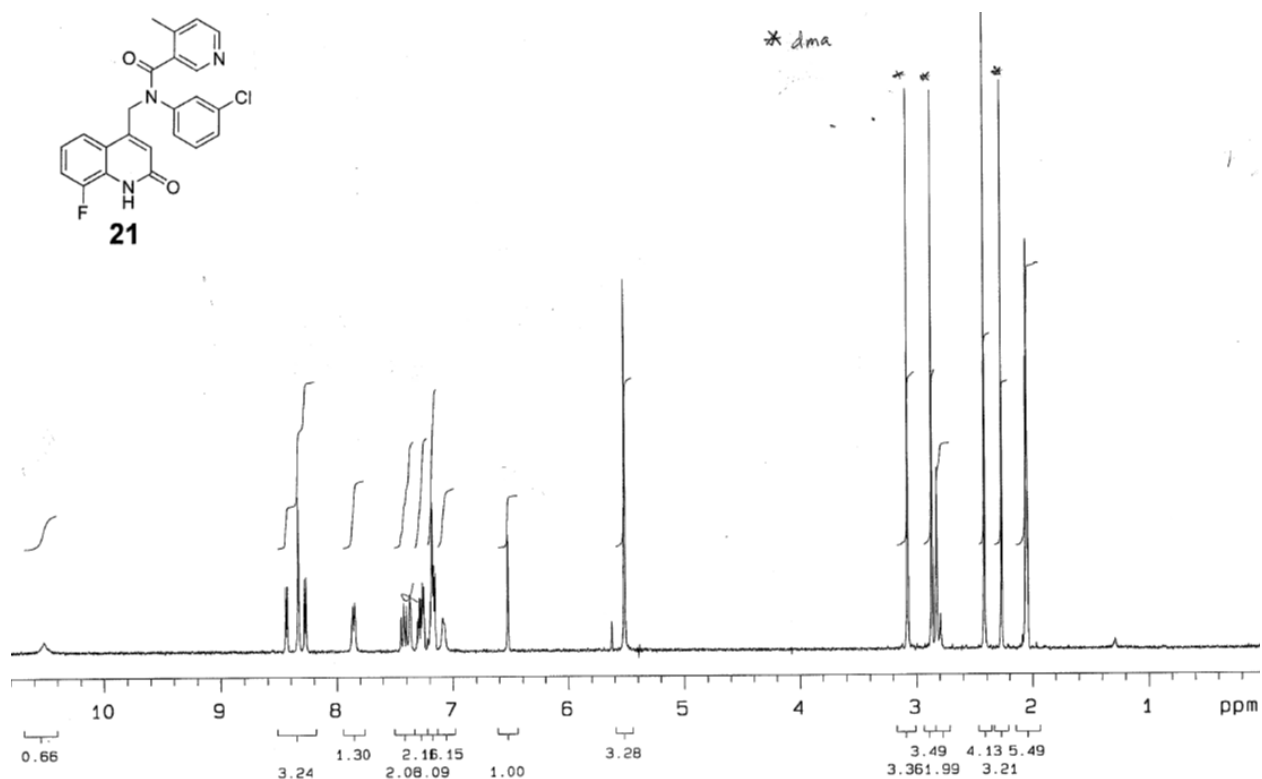

Injection Date : 9/17/2008 11:27:04 AM Seq. Line : 7  
Sample Name : K04091100 Location : Vial 20  
Acq. Operator : 1 Inj : 1  
Acq. Instrument : Kalypsys Inj Volume : 5 µl  
Sequence File : C:\CHEM32\1\SEQUENCE\DEF LC2.S  
Method : C:\CHEM32\1\METHODS\1-95 LC.M  
Last changed : 9/17/2008 9:43:27 AM by 1  
1%-95% AcCN in H2O, .05%TFA

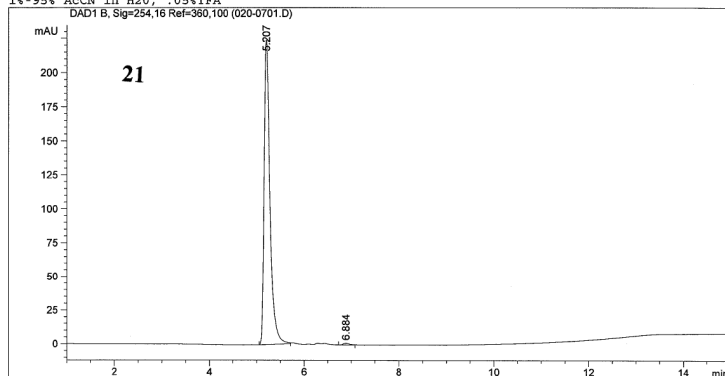

**Area Percent Report**

Sorted By : Signal  
Multiplier : 1.0000  
Dilution : 1.0000  
Use Multiplier & Dilution Factor with ISTDs

Signal 1: DAD1 B, Sig=254,16 Ref=360,100

| Peak # | RetTime [min] | Type | Width [min] | Area [mAU*s] | Height [mAU] | Area %  |
|--------|---------------|------|-------------|--------------|--------------|---------|
| 1      | 5.207         | BB   | 0.1263      | 1890.65259   | 224.32071    | 99.3888 |
| 2      | 6.884         | BB   | 0.1347      | 11.62758     | 1.27117      | 0.6112  |

Totals : 1902.28016 225.59188

**Compound 22: N-(3-Chlorophenyl)-N-((8-fluoro-2-oxo-1,2-dihydroquinolin-4-yl)methyl)-3-methylpicolinamide**

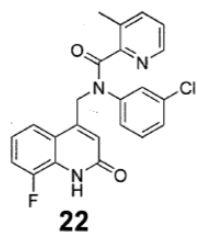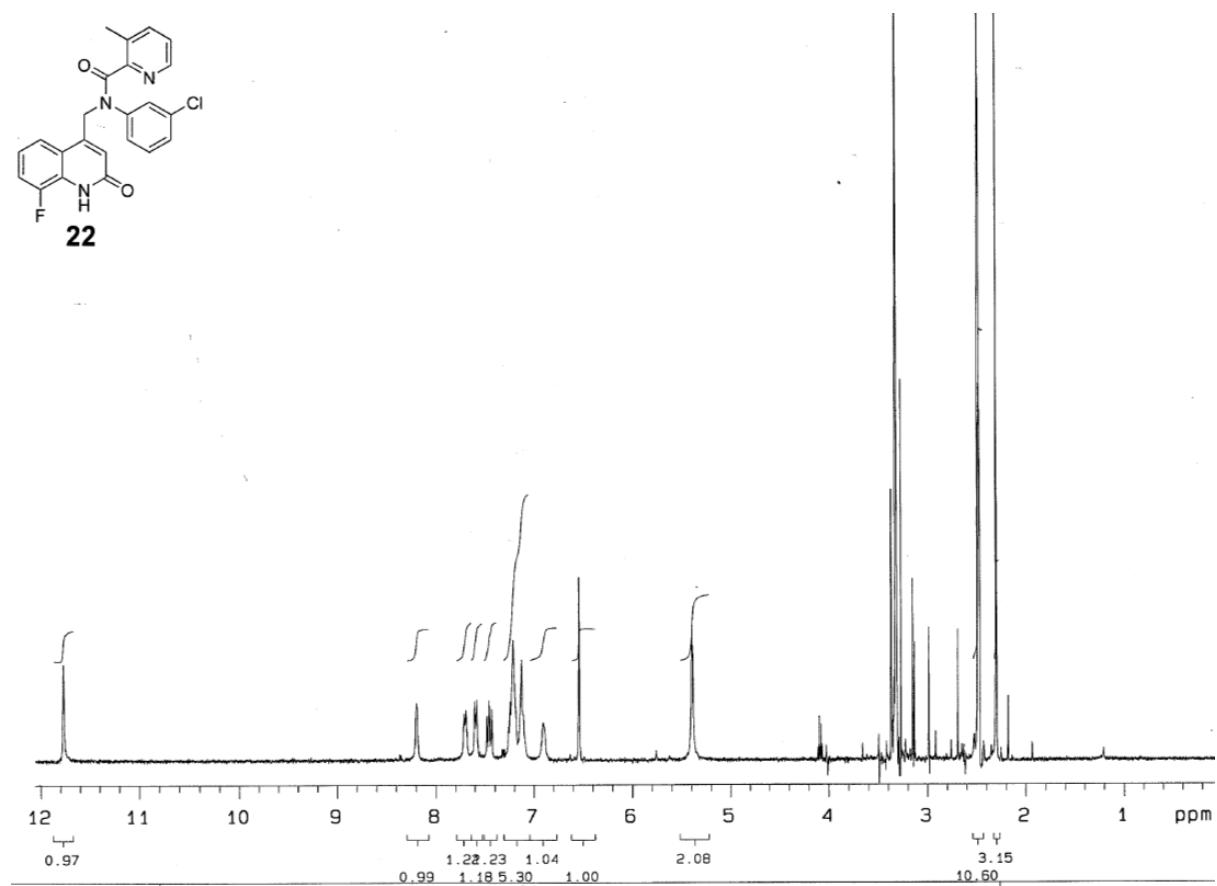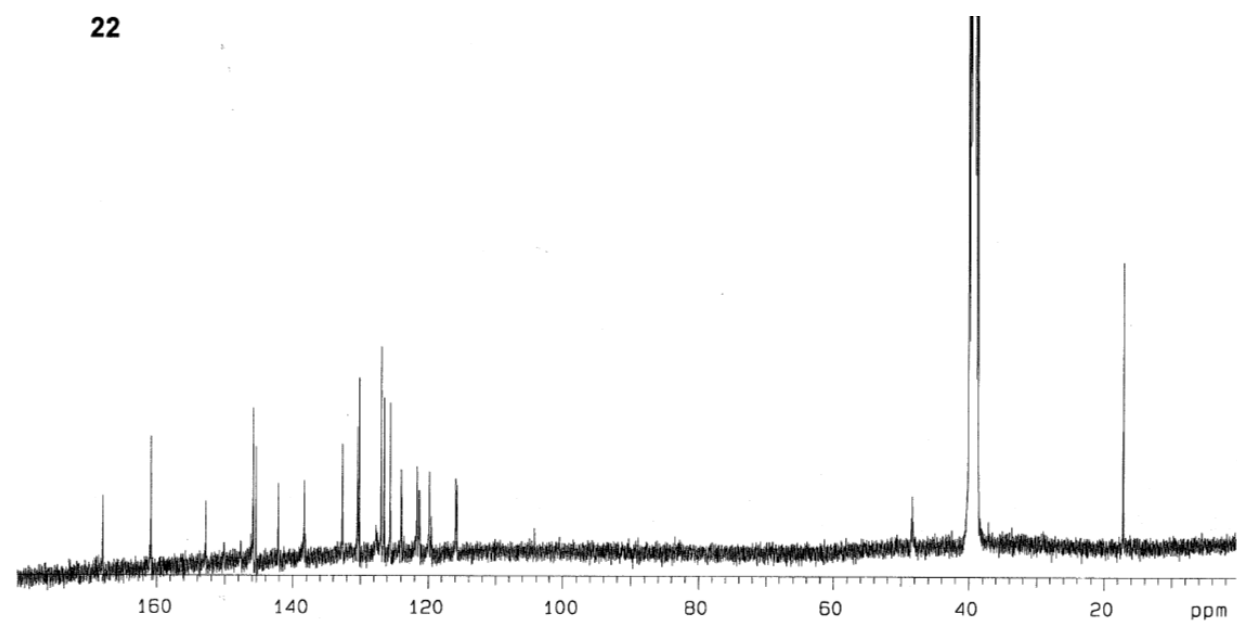



```

=====
Injection Date   : 8/21/2008 9:23:22 AM      Seq. Line :    2
Sample Name     : 000000011858             Location  : Vial 4
Acq. Operator   : 1                        Inj       :    1
Acq. Instrument : Kalypsys                  Inj Volume: 5 µl
Sequence File   : C:\CHEM32\1\SEQUENCE\DEF_LC2.S
Method          : C:\CHEM32\1\METHODS\1-95_LC.M
Last changed    : 8/21/2008 9:05:30 AM by 1
1%-95% AcCN in H2O, .05%TFA

```

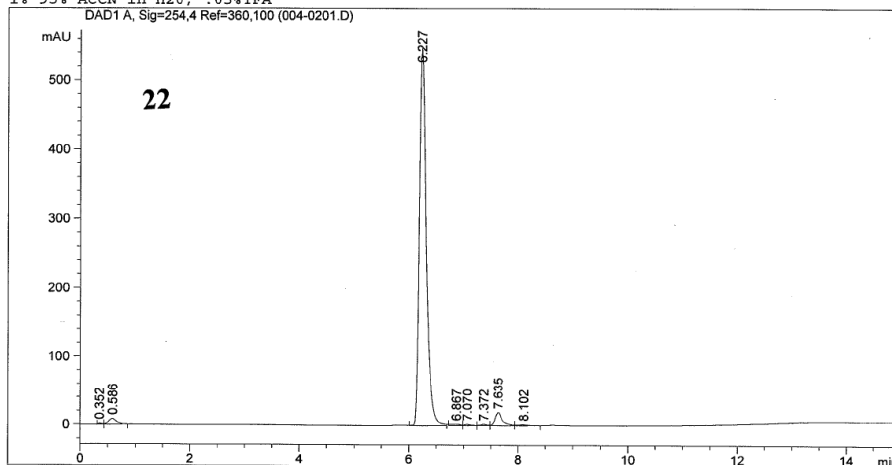

Area Percent Report

```

=====
Sorted By      :      Signal
Multiplier     :      1.0000
Dilution       :      1.0000
Use Multiplier & Dilution Factor with ISTDs

```

Signal 1: DAD1 A, Sig=254,4 Ref=360,100

| Peak # | RetTime [min] | Type | Width [min] | Area [mAU*s] | Height [mAU] | Area %  |
|--------|---------------|------|-------------|--------------|--------------|---------|
| 1      | 0.352         | BV   | 0.0612      | 8.59179      | 1.95778      | 0.1670  |
| 2      | 0.586         | VB   | 0.1521      | 86.37466     | 8.53455      | 1.6788  |
| 3      | 6.227         | BB   | 0.1323      | 4790.86719   | 546.42548    | 93.1151 |
| 4      | 6.867         | BV   | 0.1732      | 25.04912     | 2.01291      | 0.4869  |
| 5      | 7.070         | VV   | 0.1394      | 16.96075     | 1.68596      | 0.3296  |
| 6      | 7.372         | VV   | 0.1357      | 15.52606     | 1.71333      | 0.3018  |
| 7      | 7.635         | VB   | 0.1399      | 180.23767    | 19.12549     | 3.5031  |
| 8      | 8.102         | BB   | 0.2099      | 21.49721     | 1.30676      | 0.4178  |

Totals : 5145.10444 582.76227

**Compound 23: N-(3-Chlorophenyl)-N-((8-fluoro-2-oxo-1,2-dihydroquinolin-4-yl)methyl)-1-methyl-1H-imidazole-5-carboxamide**

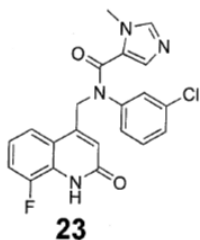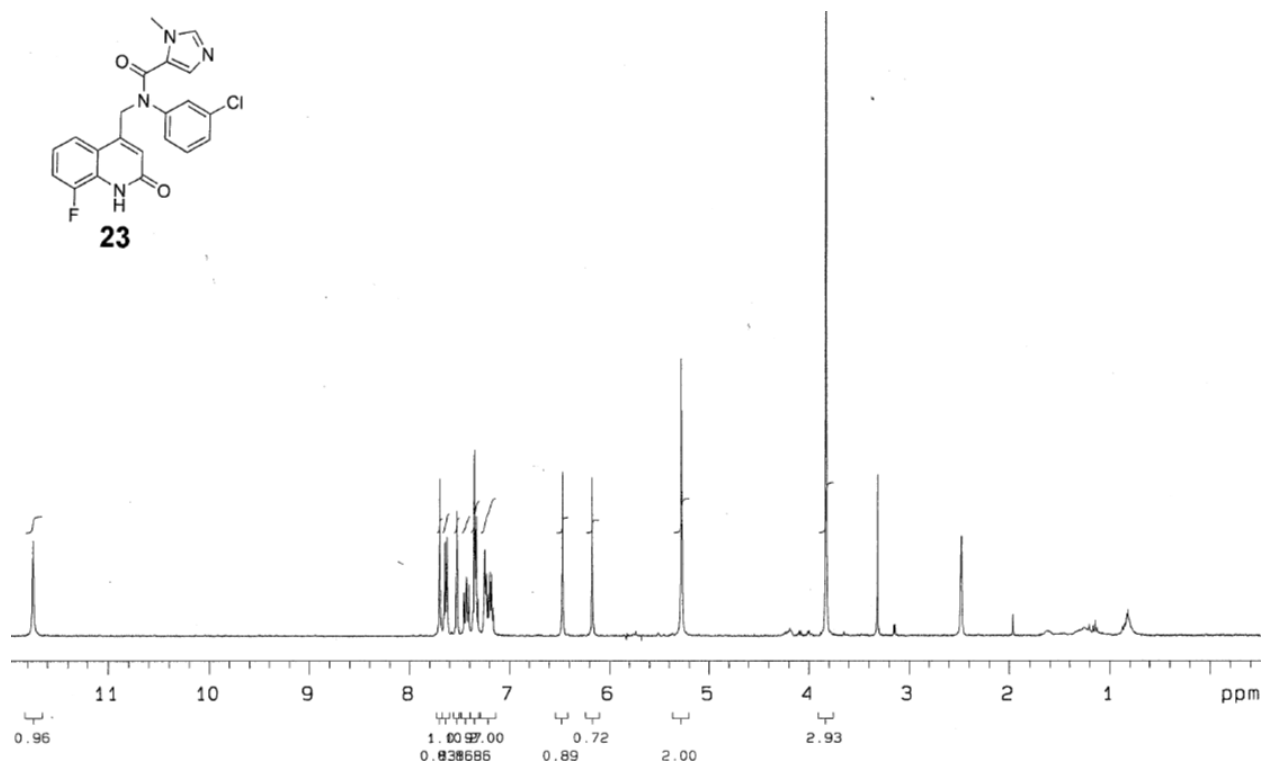

=====  
Injection Date : 9/17/2008 11:44:12 AM Seq. Line : 8  
Sample Name : 030-0801.D Location : Vial 30  
Acq. Operator : 1 Inj : 1  
Acq. Instrument : Kalypsys Inj Volume : 5 µl  
Sequence File : C:\CHEM32\1\SEQUENCE\DEF\_LC2.S  
Method : C:\CHEM32\1\METHODS\1-95\_LC.M  
Last changed : 9/17/2008 9:43:27 AM by 1  
1%-95% AcCN in H2O, .05%TFA

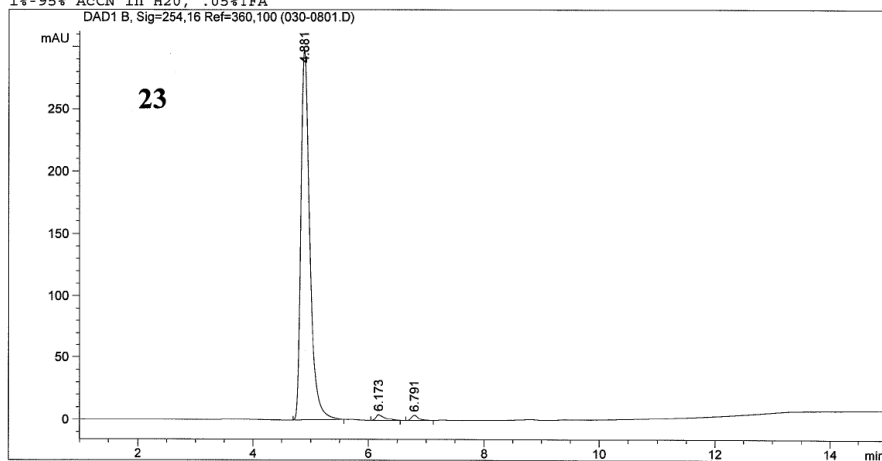

#### Area Percent Report

Sorted By : Signal  
Multiplier : 1.0000  
Dilution : 1.0000  
Use Multiplier & Dilution Factor with ISTDs

Signal 1: DAD1 B, Sig=254,16 Ref=360,100

| Peak # | RetTime [min] | Type | Width [min] | Area [mAU*s] | Height [mAU] | Area %  |
|--------|---------------|------|-------------|--------------|--------------|---------|
| 1      | 4.881         | BB   | 0.1637      | 3212.71289   | 298.23834    | 97.2035 |
| 2      | 6.173         | BB   | 0.1564      | 54.31204     | 4.78523      | 1.6433  |
| 3      | 6.791         | BB   | 0.1327      | 38.11776     | 4.33170      | 1.1533  |

Totals : 3305.14268 307.35527

**Compound 24: N-(3-Chlorophenyl)-N-((8-fluoro-2-oxo-1,2-dihydroquinolin-4-yl)methyl)-3,5-dimethylisoxazole-4-carboxamide**

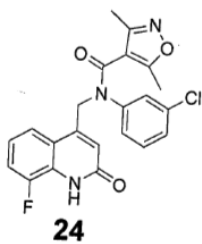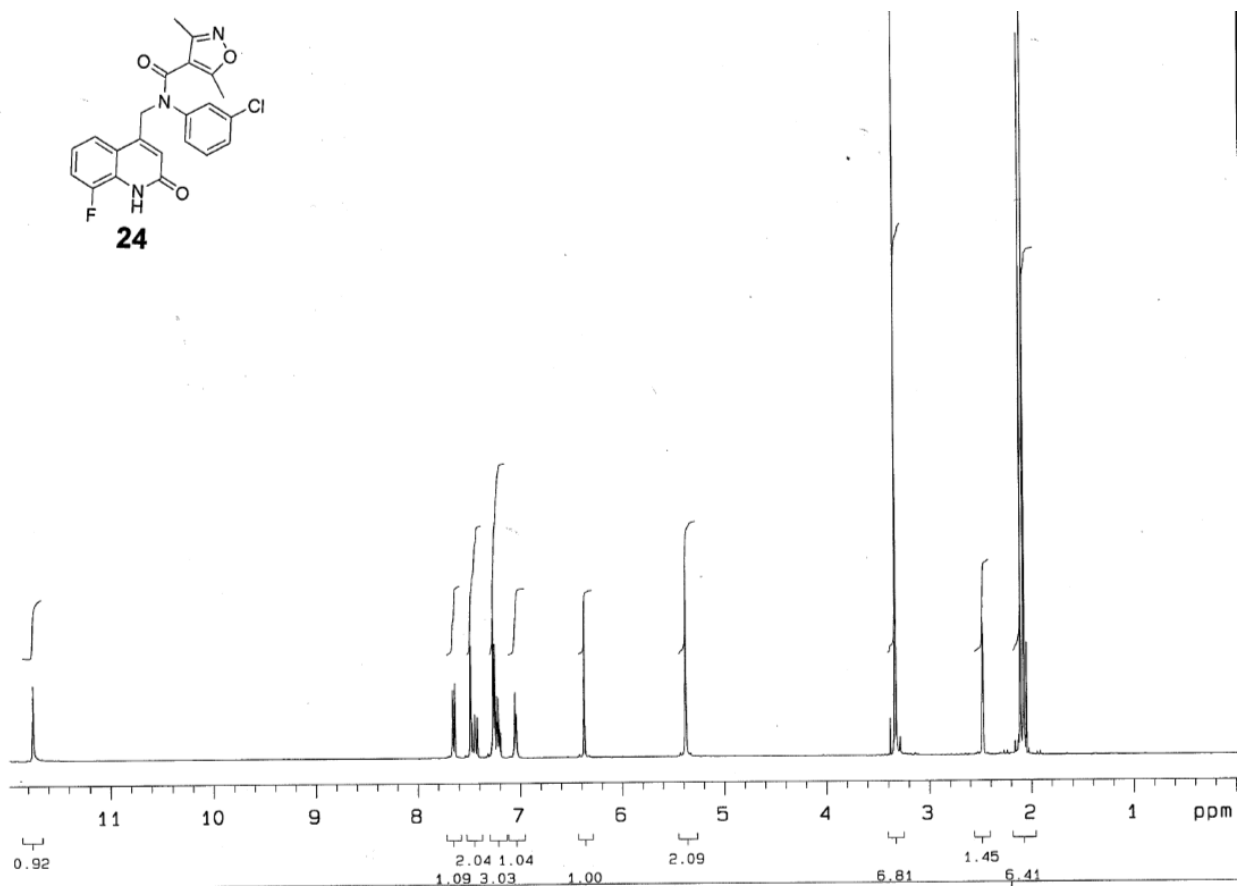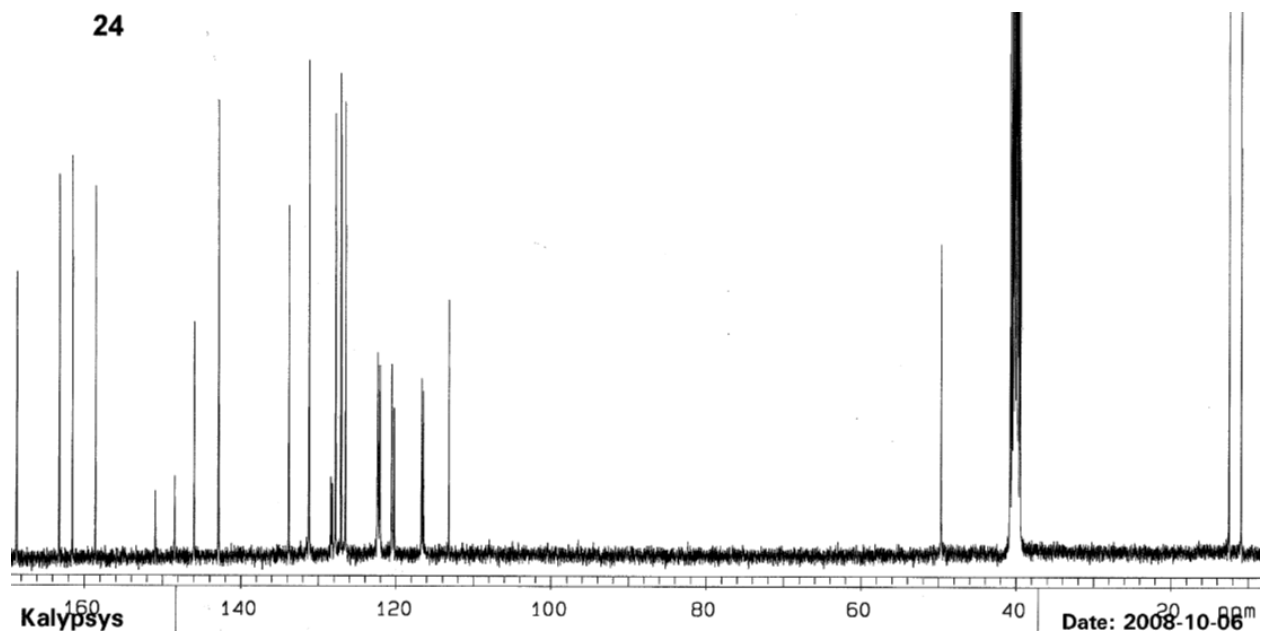

Injection Date : 8/21/2008 9:40:27 AM Seq. Line : 3  
 Sample Name : K1M103 Location : Vial 5  
 Acq. Operator : 1 Inj : 1  
 Acq. Instrument : Kalypsys Inj Volume : 5 µl  
 Sequence File : C:\CHEM32\1\SEQUENCE\DEF LC2.S  
 Method : C:\CHEM32\1\METHODS\1-95 LC.M  
 Last changed : 8/21/2008 9:05:30 AM by 1  
 1%-95% AcCN in H2O, .05%TFA

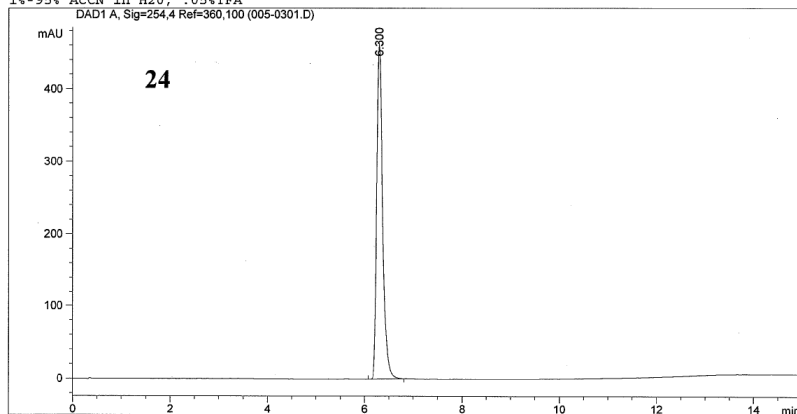

#### Area Percent Report

Sorted By : Signal  
 Multiplier : 1.0000  
 Dilution : 1.0000  
 Use Multiplier & Dilution Factor with ISTDs

Signal 1: DAD1 A, Sig=254,4 Ref=360,100

| Peak # | RetTime [min] | Type | Width [min] | Area [mAU*s] | Height [mAU] | Area %   |
|--------|---------------|------|-------------|--------------|--------------|----------|
| 1      | 6.300         | BB   | 0.1308      | 3914.82495   | 462.19650    | 100.0000 |

Totals : 3914.82495 462.19650

### Compound 25: *N*-(3-Chlorophenyl)-*N*-((8-fluoro-2-oxo-1,2-dihydroquinolin-4-yl)methyl)cyclopentanecarboxamide

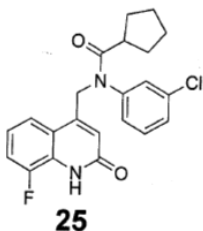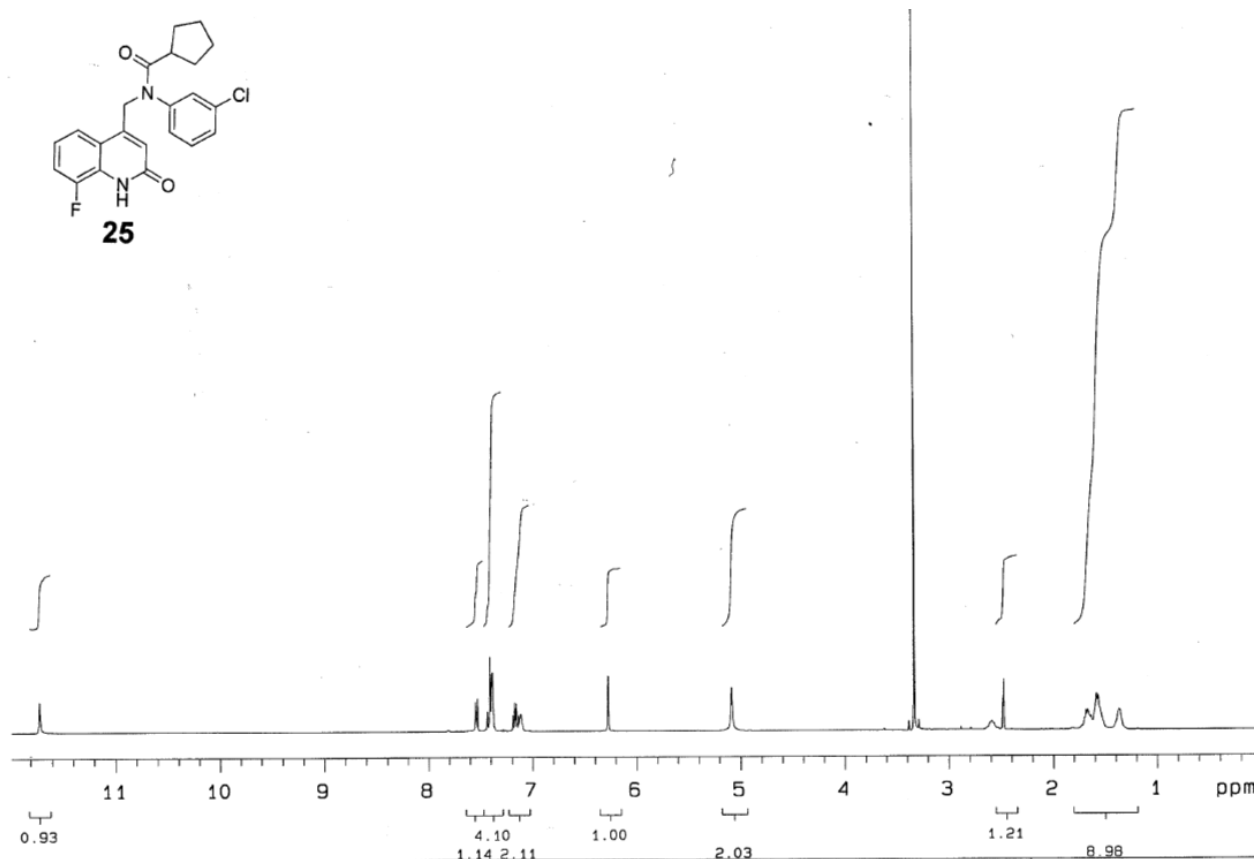

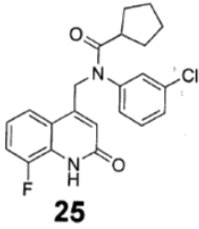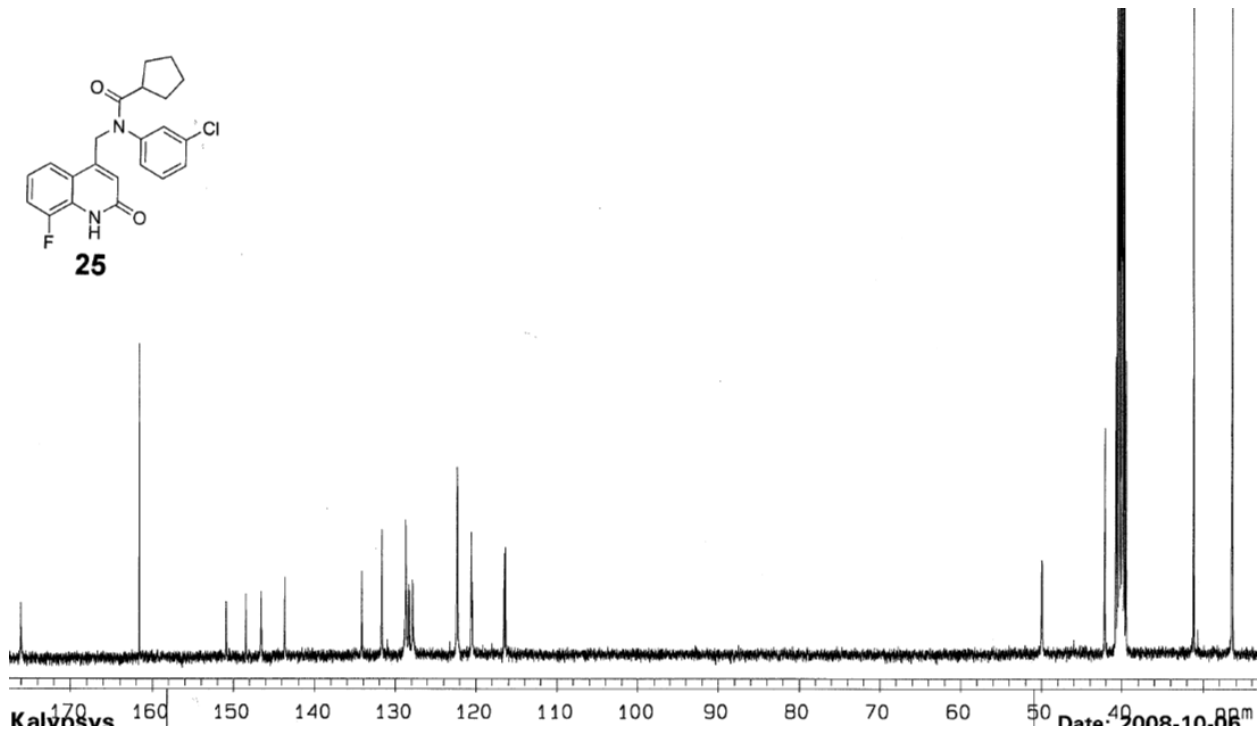

```

=====
Injection Date : 8/21/2008 9:57:31 AM      Seq. Line : 4
Sample Name    :                          Location : Vial 6
Acq. Operator  : 1                        Inj : 1
Acq. Instrument: Kalypsys                  Inj Volume : 5 µl
Sequence File  : C:\CHEM32\1\SEQUENCE\DEF_LC2.S
Method         : C:\CHEM32\1\METHODS\1-95_LC.M
Last changed   : 8/21/2008 9:05:30 AM by 1
1%-95% AcCN in H2O, .05%TFA
=====

```

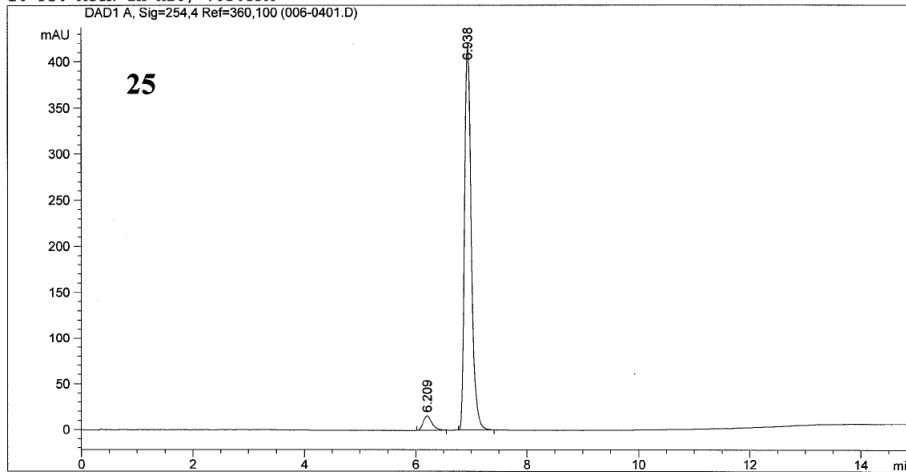

#### Area Percent Report

```

=====
Sorted By      : Signal
Multiplier     : 1.0000
Dilution       : 1.0000
Use Multiplier & Dilution Factor with ISTDs
=====

```

Signal 1: DAD1 A, Sig=254,4 Ref=360,100

| Peak # | RetTime [min] | Type | Width [min] | Area [mAU*s] | Height [mAU] | Area %  |
|--------|---------------|------|-------------|--------------|--------------|---------|
| 1      | 6.209         | BB   | 0.1766      | 175.76521    | 15.46430     | 4.7737  |
| 2      | 6.938         | BB   | 0.1320      | 3506.20996   | 417.41055    | 95.2263 |

Totals : 3681.97517 432.87486

**Compound 26: N-(3-Chlorophenyl)-N-((8-fluoro-2-oxo-1,2-dihydroquinolin-4-yl)methyl)isobutyramide**

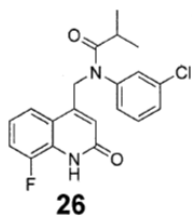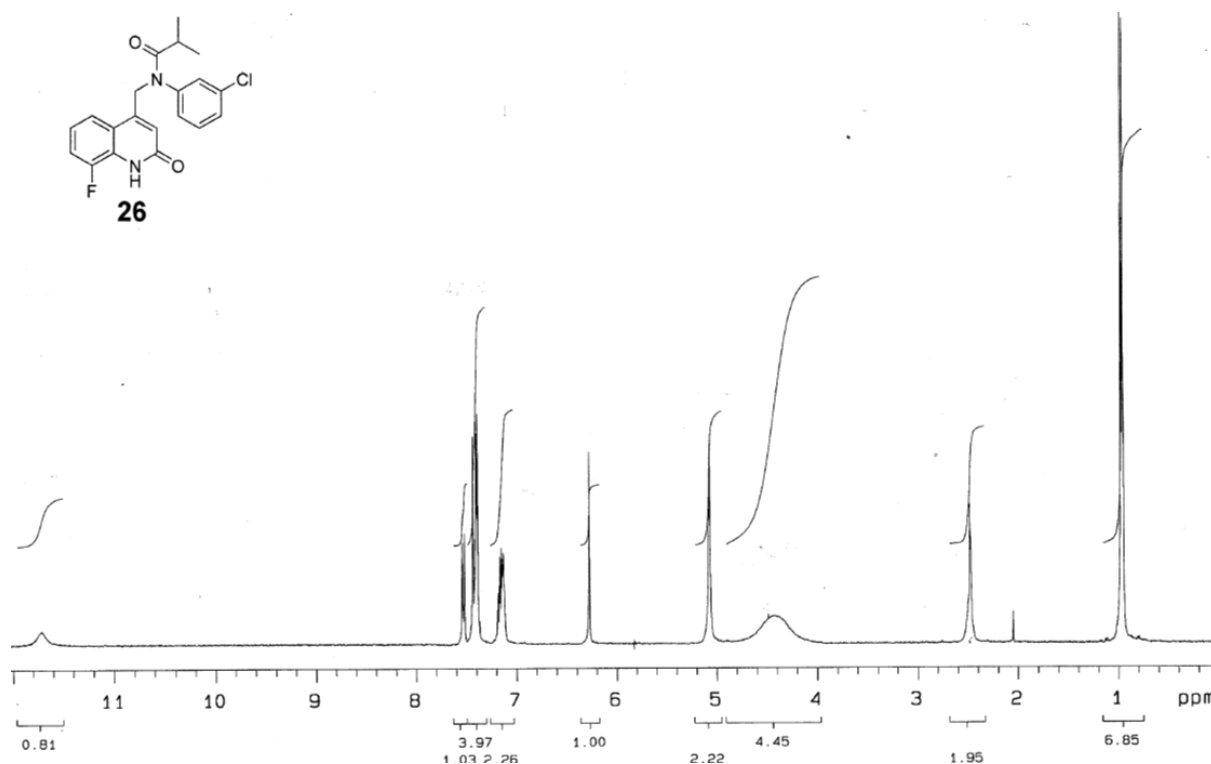

=====  
Injection Date : 9/16/2008 4:41:40 PM Seq. Line : 1  
Sample Name : Klyp930041 Location : Vial 15  
Acq. Operator : 1 Inj : 1  
Acq. Instrument : Kalypsys Inj Volume : 5 µl  
Sequence File : C:\CHEM32\1\SEQUENCE\DEF LC2.S  
Method : C:\CHEM32\1\METHODS\1-95 LC.M  
Last changed : 9/16/2008 4:40:41 PM by 1  
(modified after loading)

1%-95% AcCN in H2O, .05%TFA

DAD1 B, Sig=254,16 Ref=360,100 (015-0101.D)

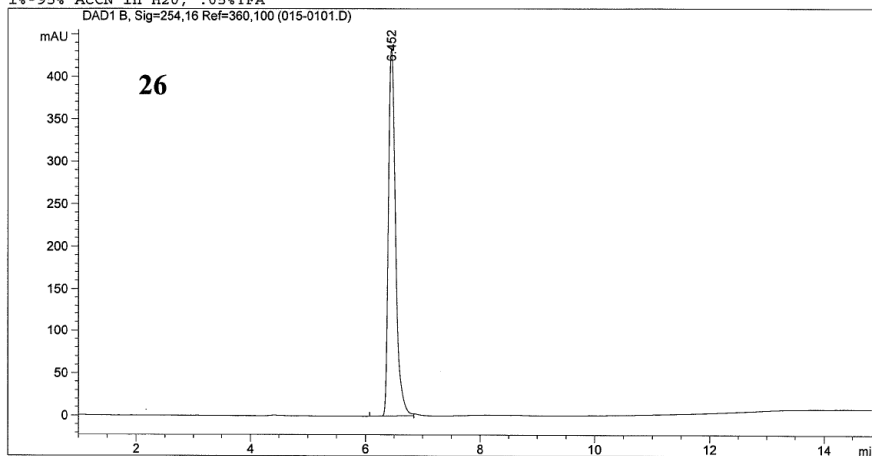

=====  
Area Percent Report  
=====

Sorted By : Signal  
Multiplier : 1.0000  
Dilution : 1.0000  
Use Multiplier & Dilution Factor with ISTDs

Signal 1: DAD1 B, Sig=254,16 Ref=360,100

| Peak # | RetTime [min] | Type | Width [min] | Area [mAU*s] | Height [mAU] | Area %   |
|--------|---------------|------|-------------|--------------|--------------|----------|
| 1      | 6.452         | BB   | 0.1345      | 3737.32983   | 433.85001    | 100.0000 |

Totals : 3737.32983 433.85001

**Compound 27: N-(3-Chlorophenyl)-4-methyl-N-((2-oxo-1,2-dihydropyridin-4-yl)methyl)thiazole-5-carboxamide**

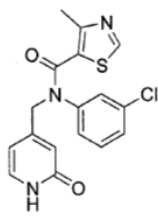

**27**

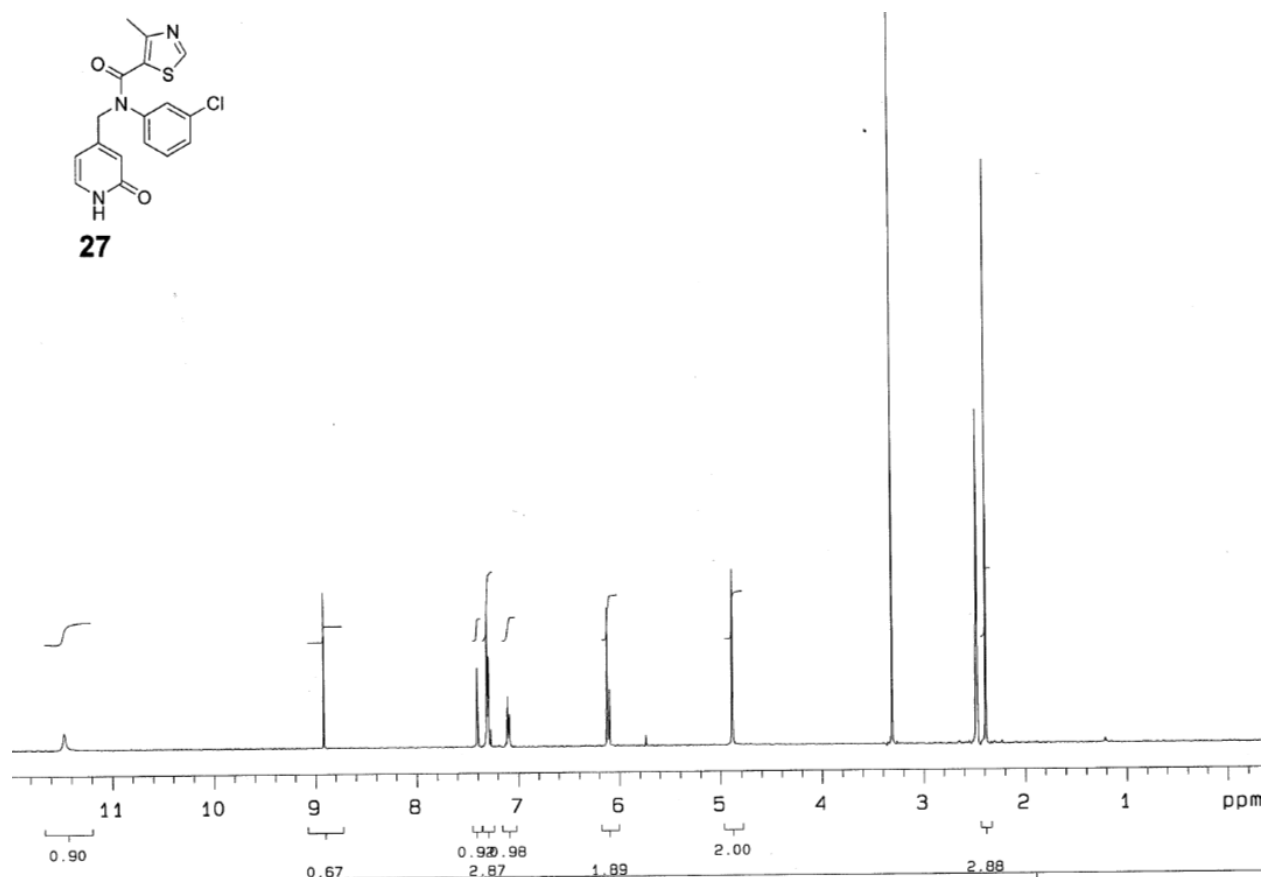

**27**

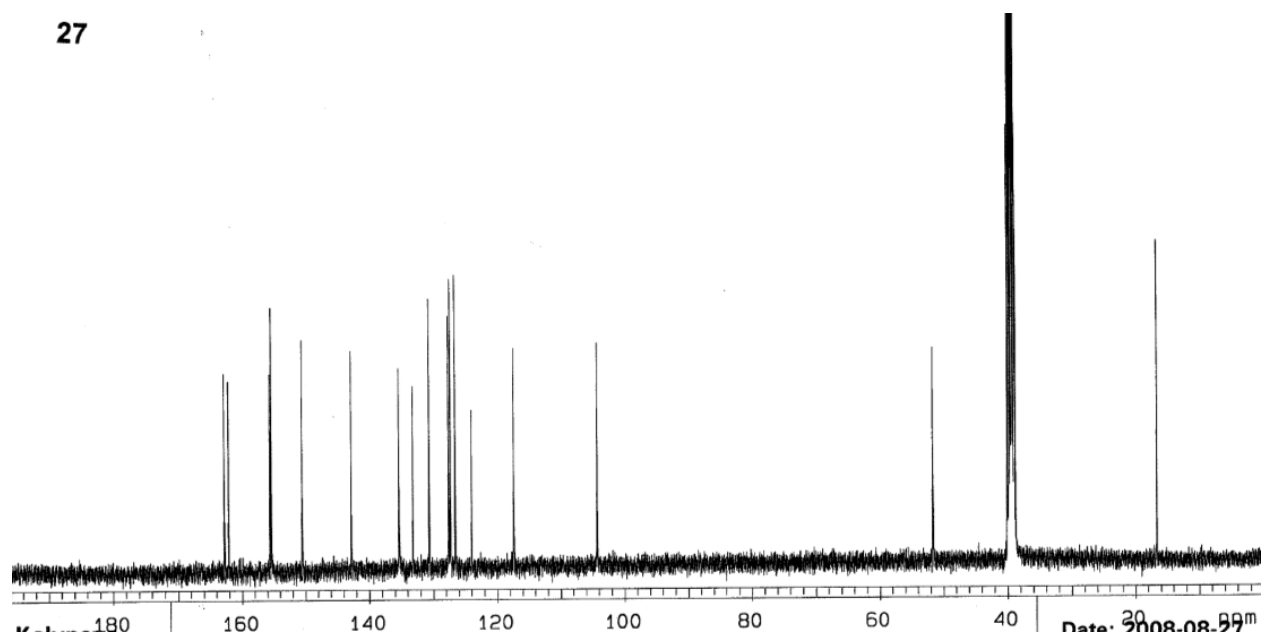

Injection Date : 8/14/2008 3:51:00 PM Seq. Line : 2  
 Sample Name : 00029307 Location : Vial 4  
 Acq. Operator : / Inj : 1  
 Acq. Instrument : Kalypsys Inj Volume : 5 µl  
 Sequence File : C:\CHEM32\1\SEQUENCE\DEF LC2.S  
 Method : C:\CHEM32\1\METHODS\1-95 LC.M  
 Last changed : 8/14/2008 3:32:58 PM by 7  
 1%-95% AcCN in H2O, .05%TFA

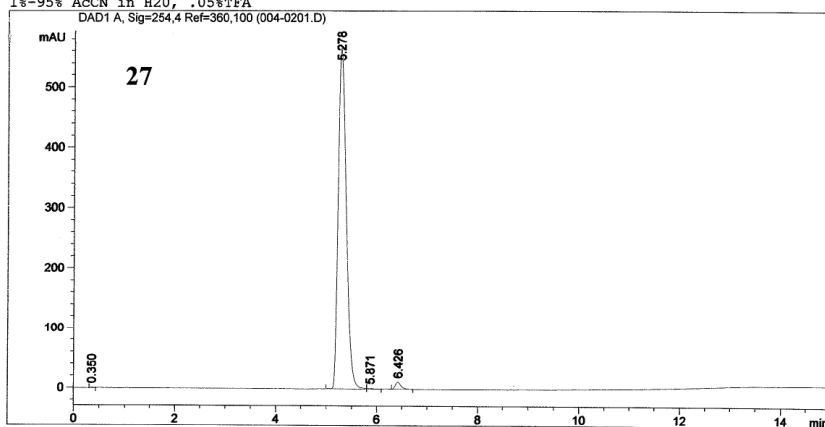

#### Area Percent Report

Sorted By : Signal  
 Multiplier : 1.0000  
 Dilution : 1.0000  
 Use Multiplier & Dilution Factor with ISTDs

Signal 1: DAD1 A, Sig=254,4 Ref=360,100

| Peak # | RetTime [min] | Type | Width [min] | Area [mAU*s] | Height [mAU] | Area %  |
|--------|---------------|------|-------------|--------------|--------------|---------|
| 1      | 0.350         | BB   | 0.0535      | 5.19504      | 1.39454      | 0.0821  |
| 2      | 5.278         | BV   | 0.1701      | 6213.00684   | 565.70599    | 98.1694 |
| 3      | 5.871         | VV   | 0.1339      | 15.86114     | 1.65419      | 0.2506  |
| 4      | 6.426         | VB   | 0.1200      | 94.80267     | 12.02695     | 1.4979  |

Totals : 6328.86569 580.78168

### Compound 28: *N*-(3-Chlorophenyl)-4-methyl-*N*-((2-oxo-1,2,5,6,7,8-hexahydroquinolin-4-yl)methyl)thiazole-5-carboxamide

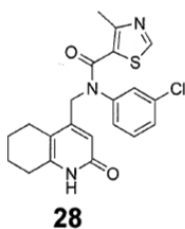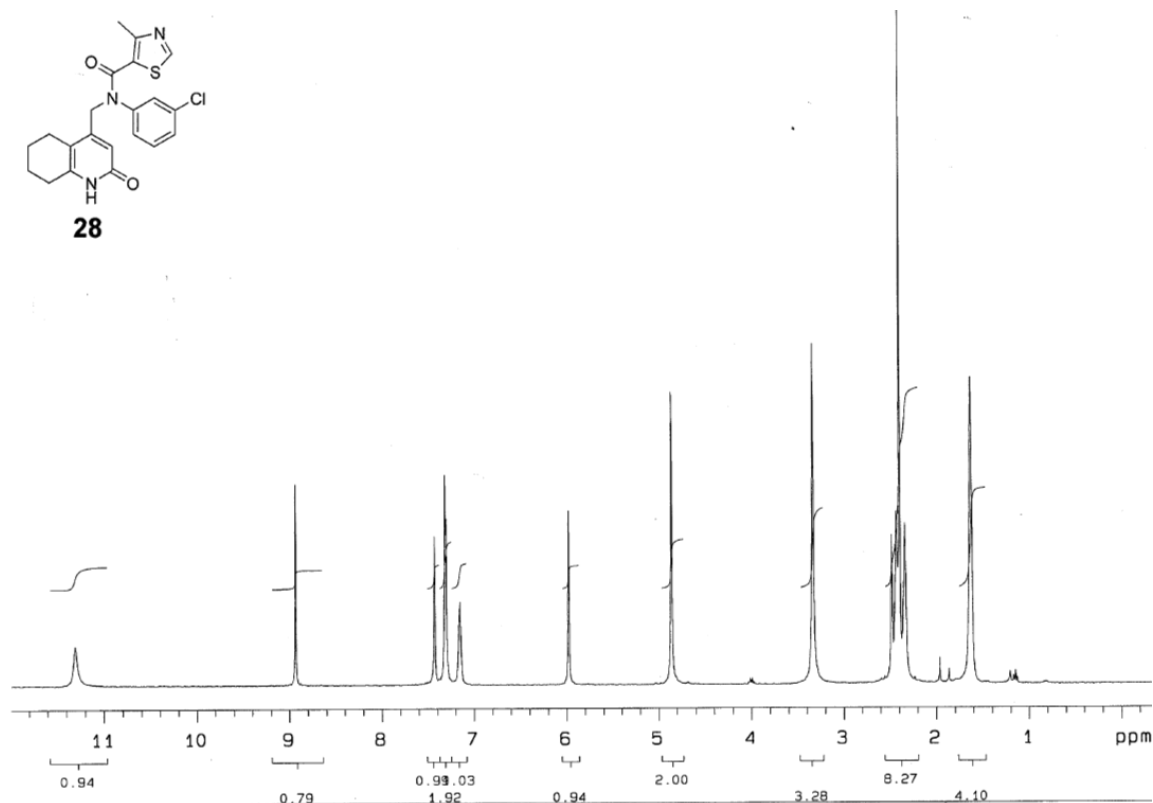



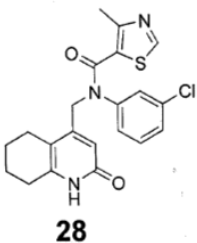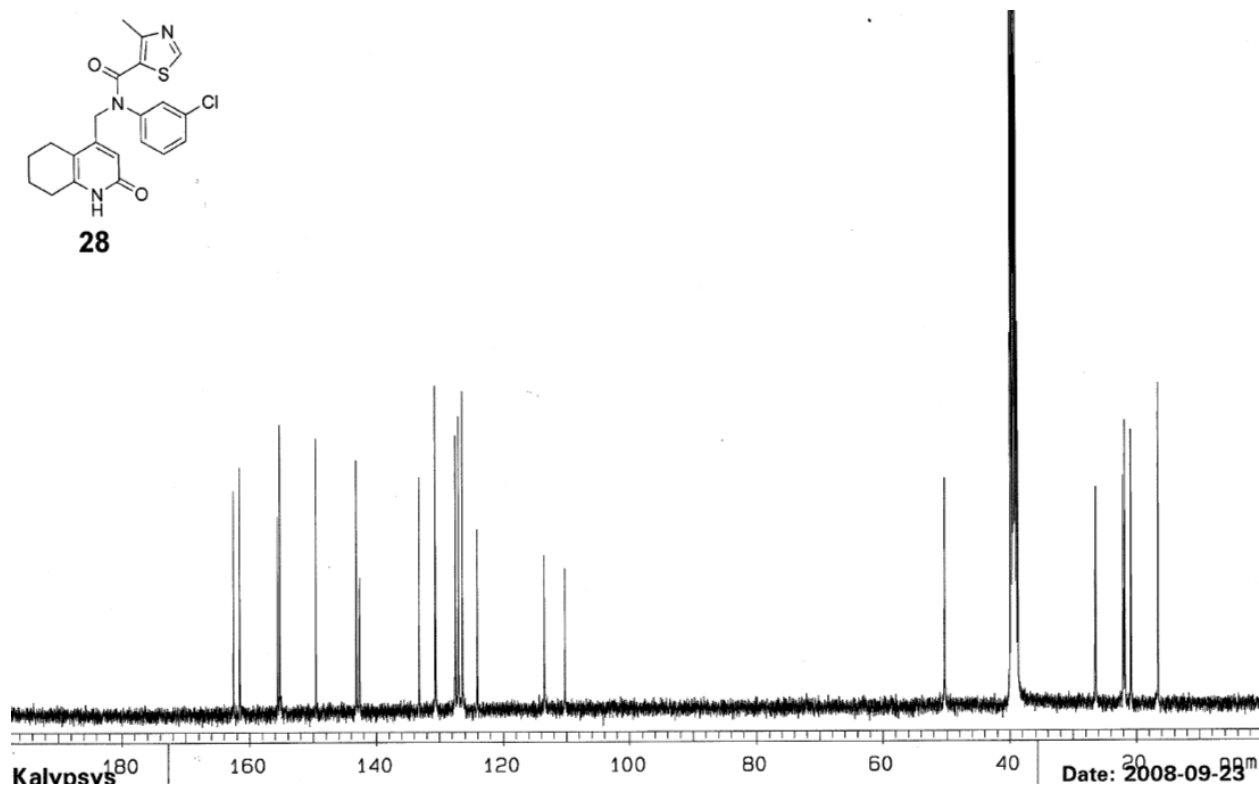

```

=====
Injection Date : 9/17/2008 9:44:34 AM      Seq. Line : 1
Sample Name    : Klyp930748              Location : Vial 11
Acq. Operator  : 1                        Inj : 1
Acq. Instrument: Kalypsys                  Inj Volume : 5 µl
Sequence File  : C:\CHEM32\1\SEQUENCE\DEF_LC2.S
Method         : C:\CHEM32\1\METHODS\1-95_LC.M
Last changed   : 9/17/2008 9:43:27 AM by 1
1%-95% AcCN in H2O, .05%TFA

```

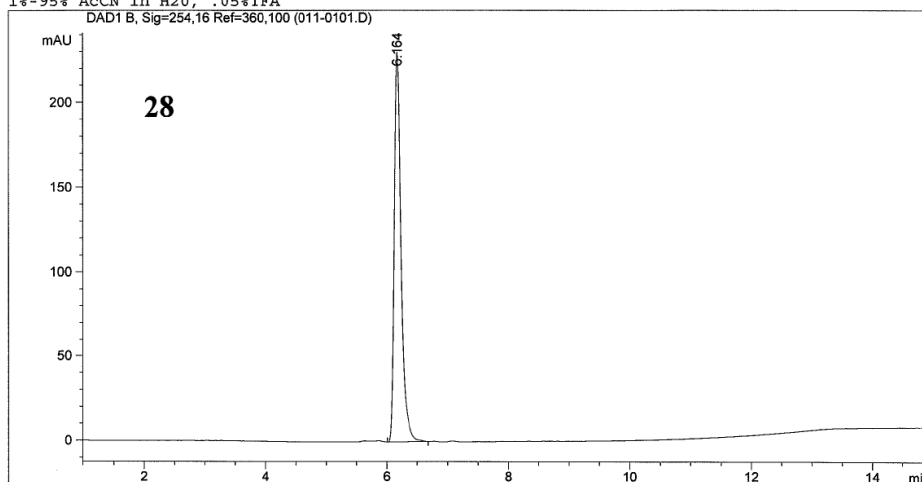

# Area Percent Report

```

=====
Sorted By      : Signal
Multiplier     : 1.0000
Dilution       : 1.0000
Use Multiplier & Dilution Factor with ISTDs

```

Signal 1: DAD1 B, Sig=254,16 Ref=360,100

| Peak # | RetTime [min] | Type | Width [min] | Area [mAU*s] | Height [mAU] | Area %   |
|--------|---------------|------|-------------|--------------|--------------|----------|
| 1      | 6.164         | VB   | 0.1144      | 1747.68481   | 230.53638    | 100.0000 |

Totals : 1747.68481 230.53638

**Compound 29: *N*-(3-Chlorophenyl)-*N*-((8-fluoro-2-oxo-2*H*-chromen-4-yl)methyl)-5-methylthiazole-4-carboxamide**

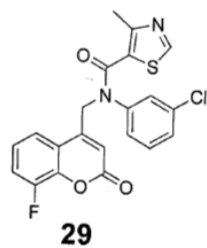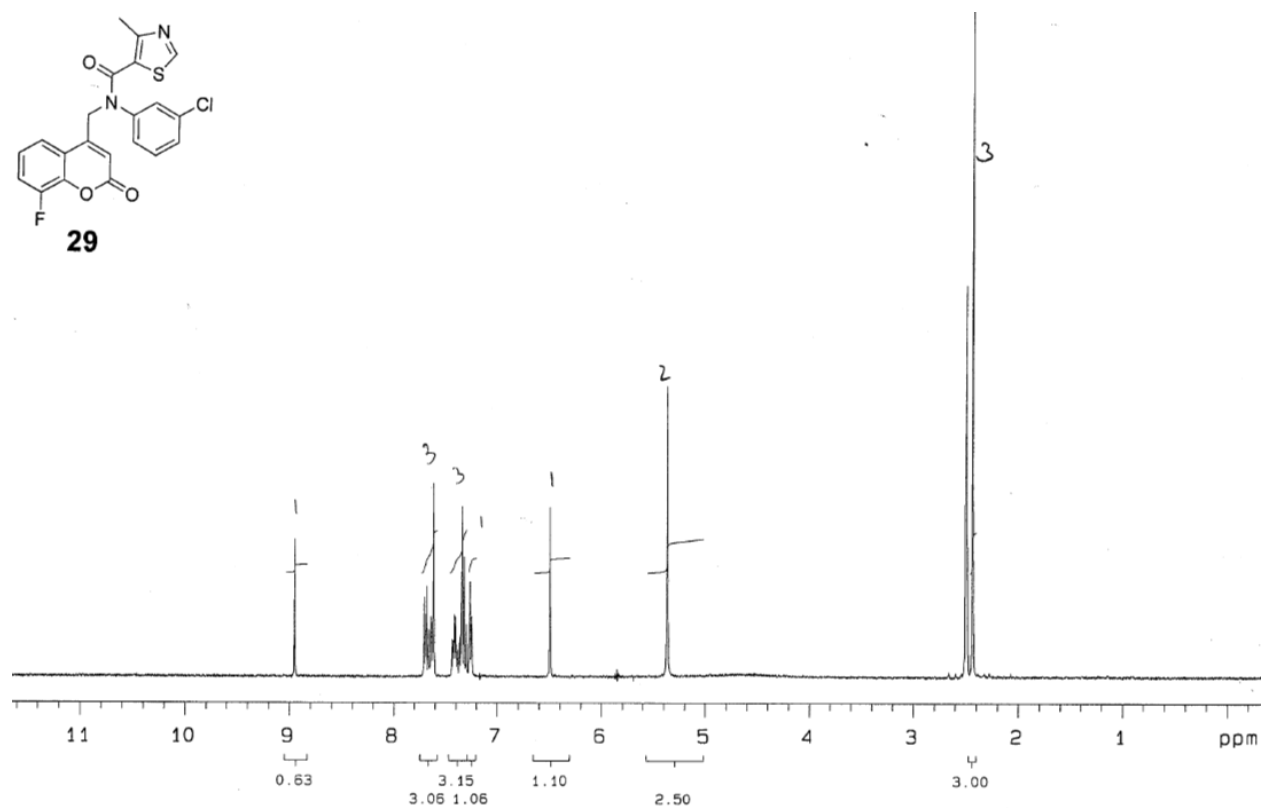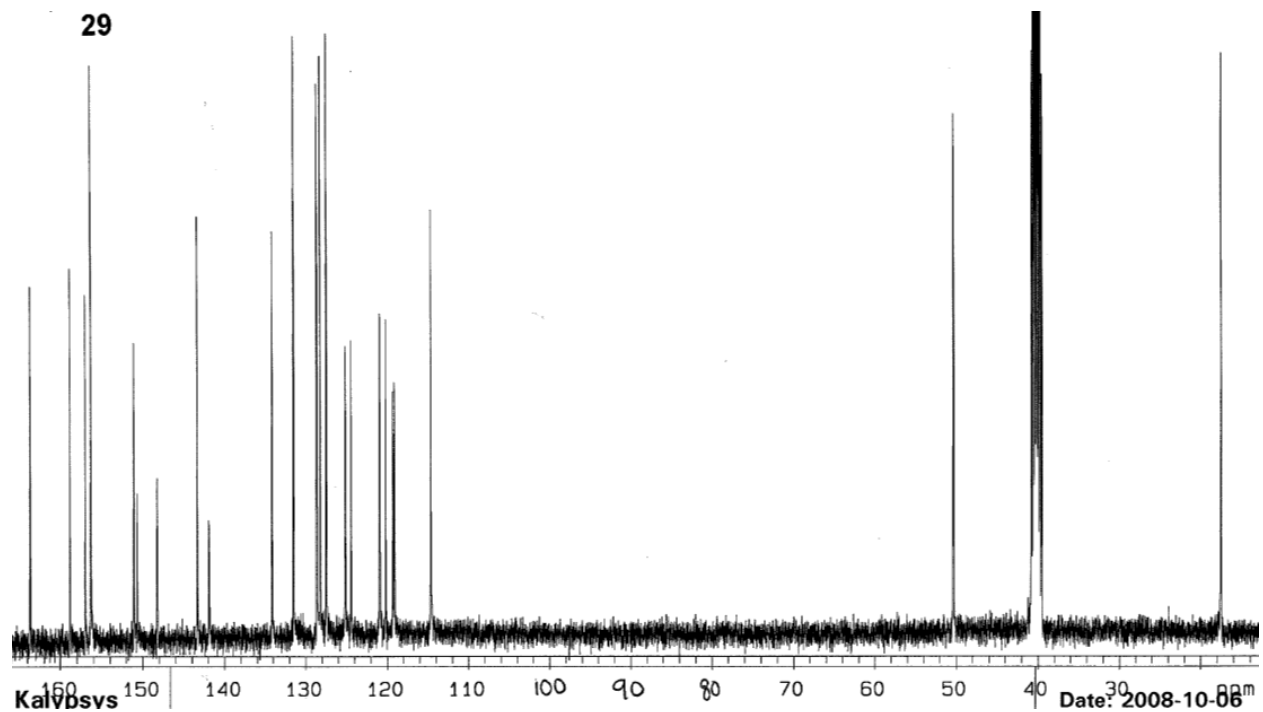

Injection Date : 8/14/2008 4:08:06 PM Seq. Line : 3  
 Sample Name : KLYE0093086r Location : Vial 5  
 Acq. Operator : 7 Inj : 1  
 Acq. Instrument : Kalypsys Inj Volume : 5 µl  
 Sequence File : C:\CHEM32\1\SEQUENCE\DEF LC2.S  
 Method : C:\CHEM32\1\METHODS\1-95 LC.M  
 Last changed : 8/14/2008 3:32:58 PM by 7  
 1%-95% AcCN in H2O, .05%TFA

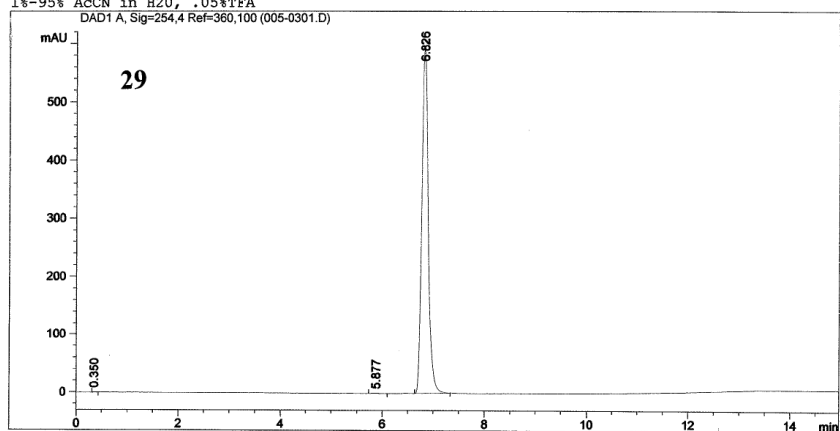

#### Area Percent Report

Sorted By : Signal  
 Multiplier : 1.0000  
 Dilution : 1.0000  
 Use Multiplier & Dilution Factor with ISTDs

Signal 1: DAD1 A, Sig=254,4 Ref=360,100

| Peak # | RetTime [min] | Type | Width [min] | Area [mAU*s] | Height [mAU] | Area %  |
|--------|---------------|------|-------------|--------------|--------------|---------|
| 1      | 0.350         | BB   | 0.0534      | 5.40977      | 1.38898      | 0.0985  |
| 2      | 5.877         | BB   | 0.1149      | 9.61642      | 1.15747      | 0.1751  |
| 3      | 6.826         | VB   | 0.1438      | 5477.54199   | 592.62488    | 99.7264 |

Totals : 5492.56818 595.17133

### Compound 30: *N*-(3-Chlorophenyl)-*N*-((8-fluoro-2-methoxyquinolin-4-yl)methyl)-4-methylthiazole-5-carboxamide

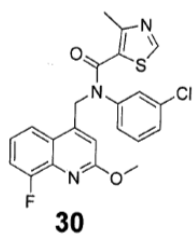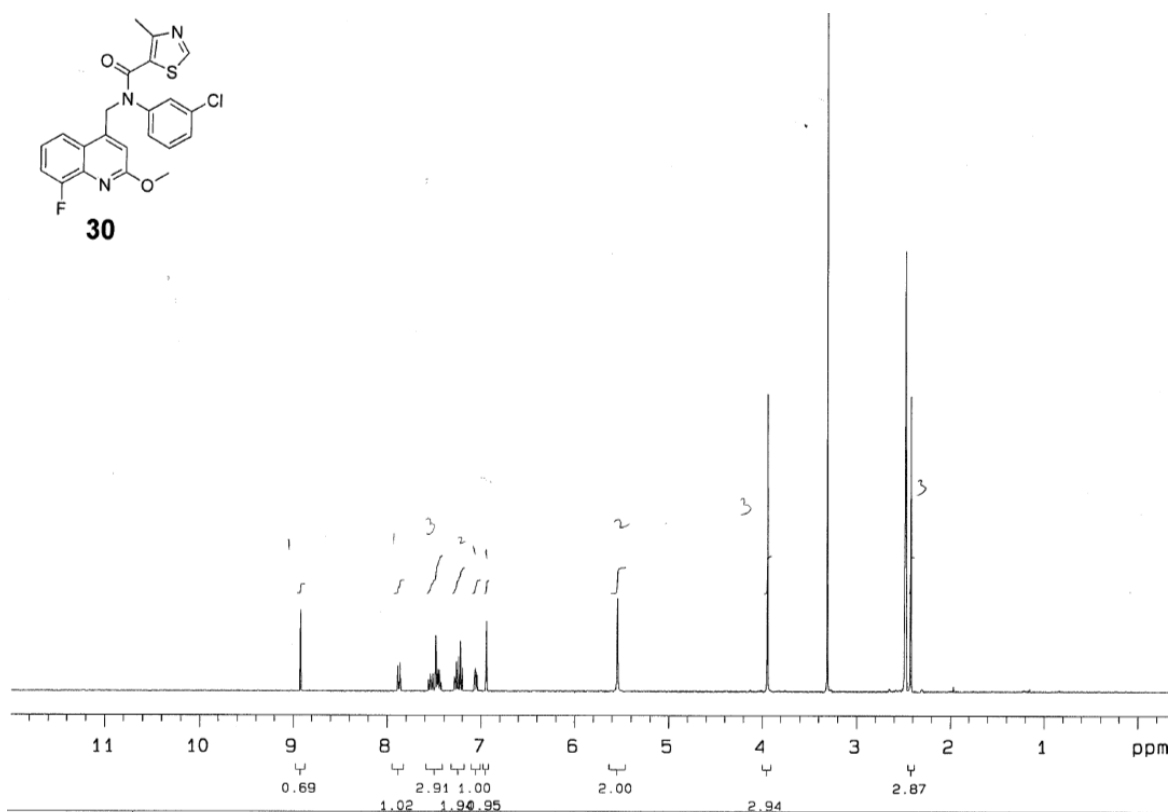

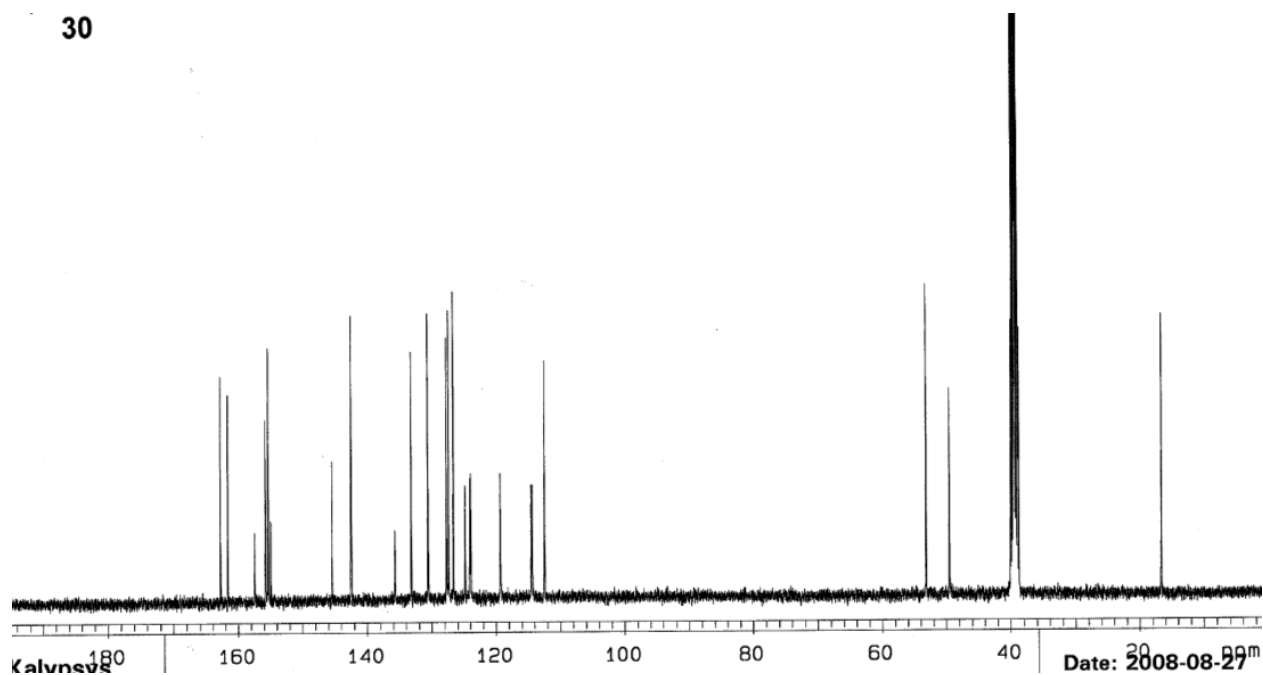

Injection Date : 8/14/2008 4:25:10 PM      Seq. Line : 4  
 Sample Name :      Location : Vial 6  
 Acq. Operator : 7      Inj : 1  
 Acq. Instrument : Kalypsys      Inj Volume : 5 µl  
 Sequence File : C:\CHEM32\1\SEQUENCE\DEF\_LC2.S  
 Method : C:\CHEM32\1\METHODS\1-95 LC.M  
 Last changed : 8/14/2008 3:32:58 PM by 7  
 1%-95% AcCN in H2O, .05%TFA

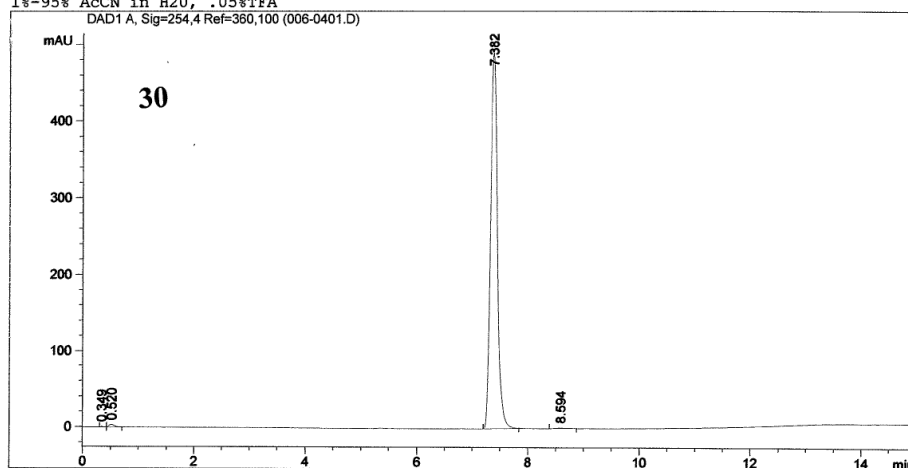

# Area Percent Report

Sorted By : Signal  
 Multiplier : 1.0000  
 Dilution : 1.0000  
 Use Multiplier & Dilution Factor with ISTDs

Signal 1: DAD1 A, Sig=254,4 Ref=360,100

| Peak # | RetTime [min] | Type | Width [min] | Area [mAU*s] | Height [mAU] | Area %  |
|--------|---------------|------|-------------|--------------|--------------|---------|
| 1      | 0.349         | BV   | 0.0527      | 5.65914      | 1.47844      | 0.1282  |
| 2      | 0.520         | VB   | 0.1057      | 25.36127     | 3.53634      | 0.5743  |
| 3      | 7.382         | BB   | 0.1398      | 4368.42920   | 490.92468    | 98.9293 |
| 4      | 8.594         | BB   | 0.1743      | 16.26006     | 1.21402      | 0.3682  |

Totals : 4415.70966 497.15347

**Compound 31: N-(3-chlorophenyl)-N-((8-fluoro-1-methyl-2-oxo-1,2-dihydroquinolin-4-yl)methyl)-4-methylthiazole-5-carboxamide**

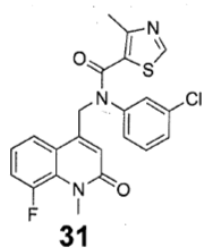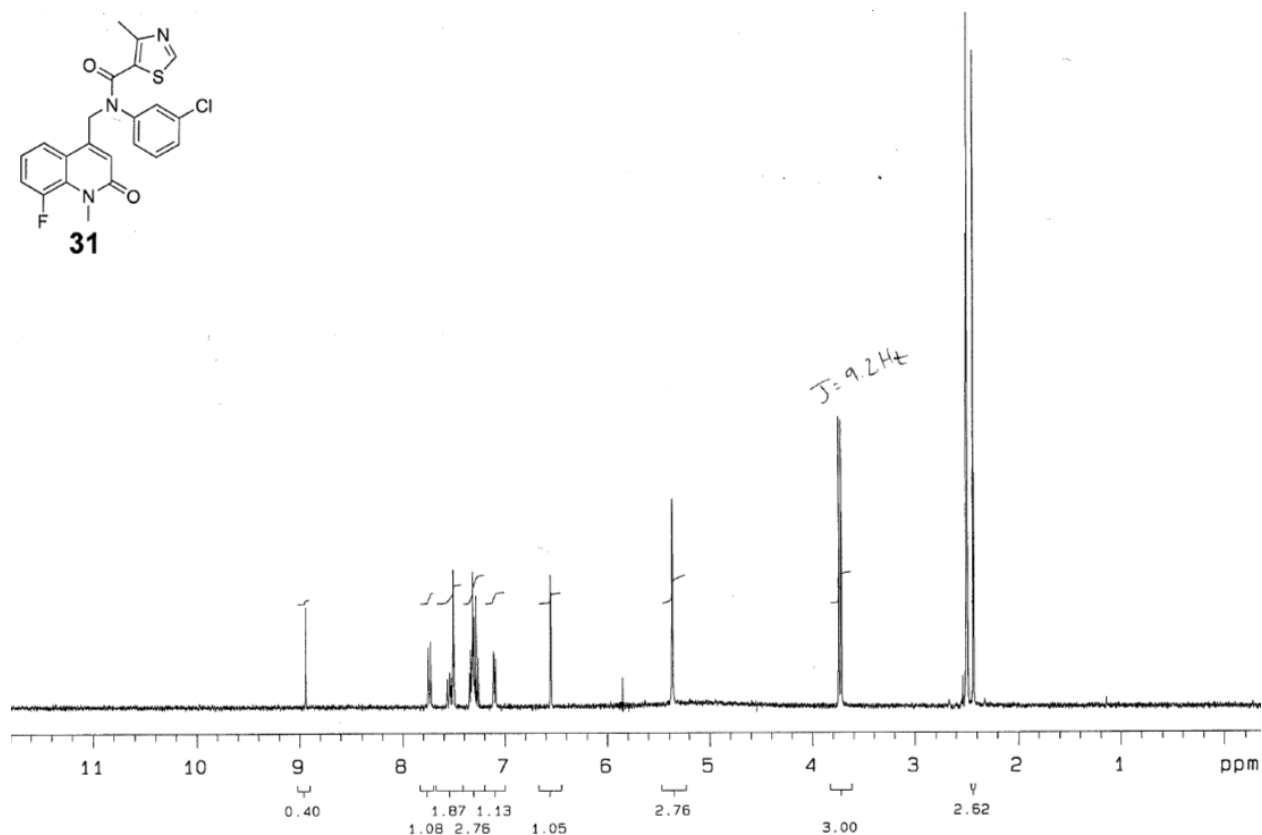

=====  
Injection Date : 9/17/2008 10:35:48 AM Seq. Line : 4  
Sample Name : 0309040007 Location : Vial 14  
Acq. Operator : 1 Inj : 1  
Acq. Instrument : Kalypsys Inj Volume : 5 µl  
Sequence File : C:\CHEM32\1\SEQUENCE\DEF\_LC2.S  
Method : C:\CHEM32\1\METHODS\1-95\_LC.M  
Last changed : 9/17/2008 9:43:27 AM by 1  
1%-95% AcCN in H2O, .05%TFA  
DAD1 B, Sig=254,16 Ref=360,100 (014-0401.D)

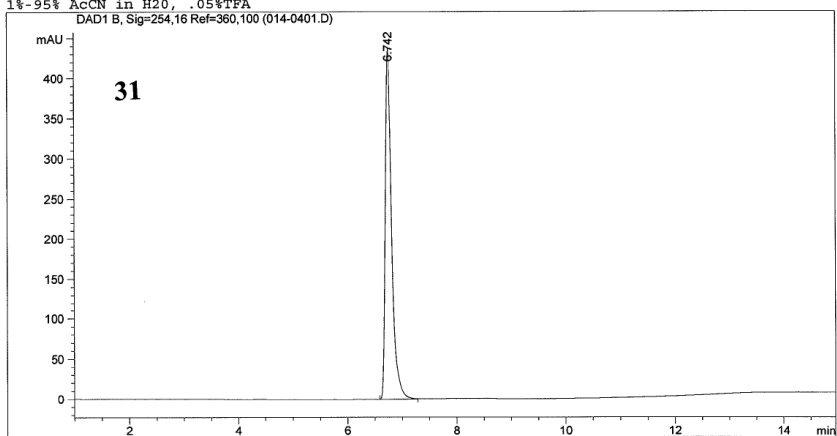

=====  
Area Percent Report  
=====

Sorted By : Signal  
Multiplier : 1.0000  
Dilution : 1.0000  
Use Multiplier & Dilution Factor with ISTDs

Signal 1: DAD1 B, Sig=254,16 Ref=360,100

| Peak # | RetTime [min] | Type | Width [min] | Area [mAU*s] | Height [mAU] | Area %   |
|--------|---------------|------|-------------|--------------|--------------|----------|
| 1      | 6.742         | BB   | 0.1259      | 3586.06836   | 436.33945    | 100.0000 |

Totals : 3586.06836 436.33945

**Compound 32: N-(3-Chlorophenyl)-N-((8-fluoroquinolin-4-yl)methyl)-4-methylthiazole-5-carboxamide**

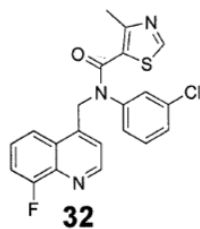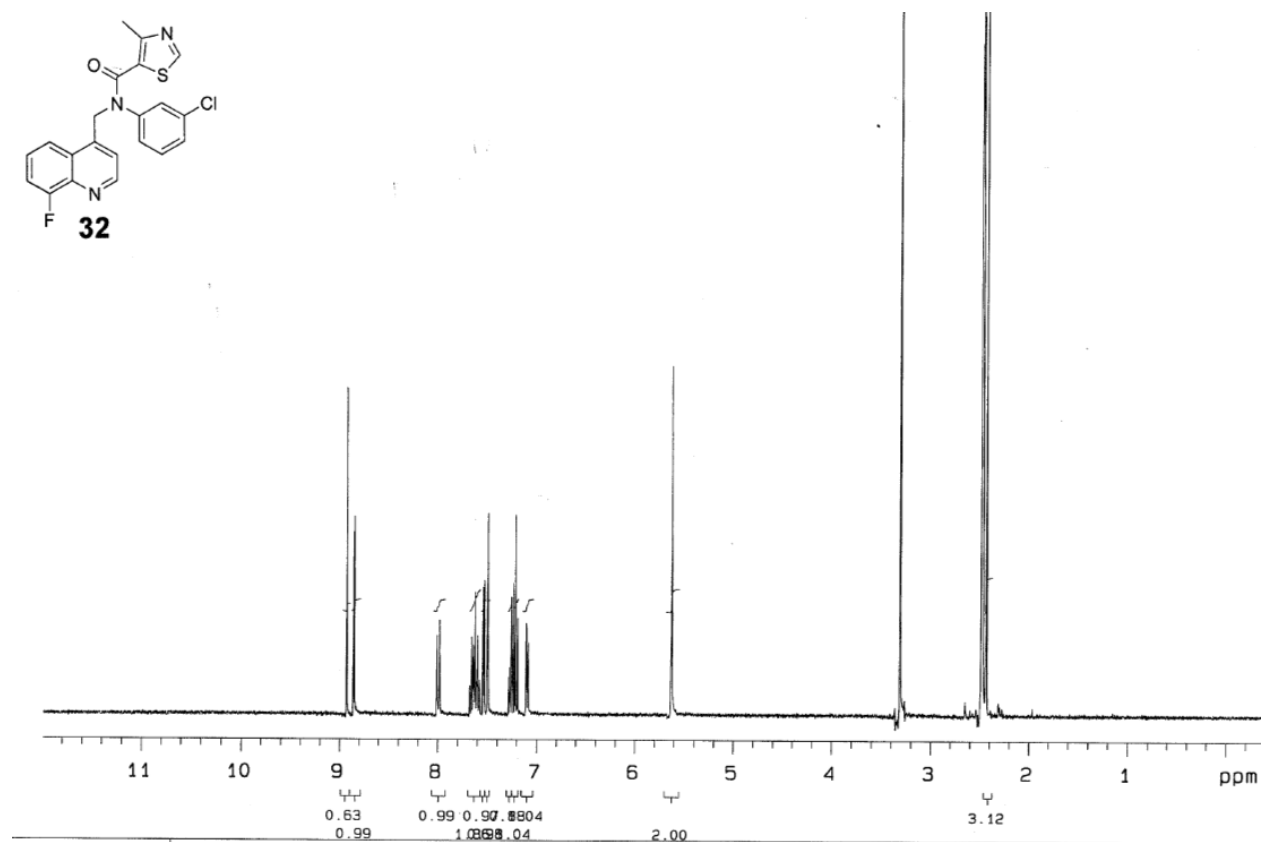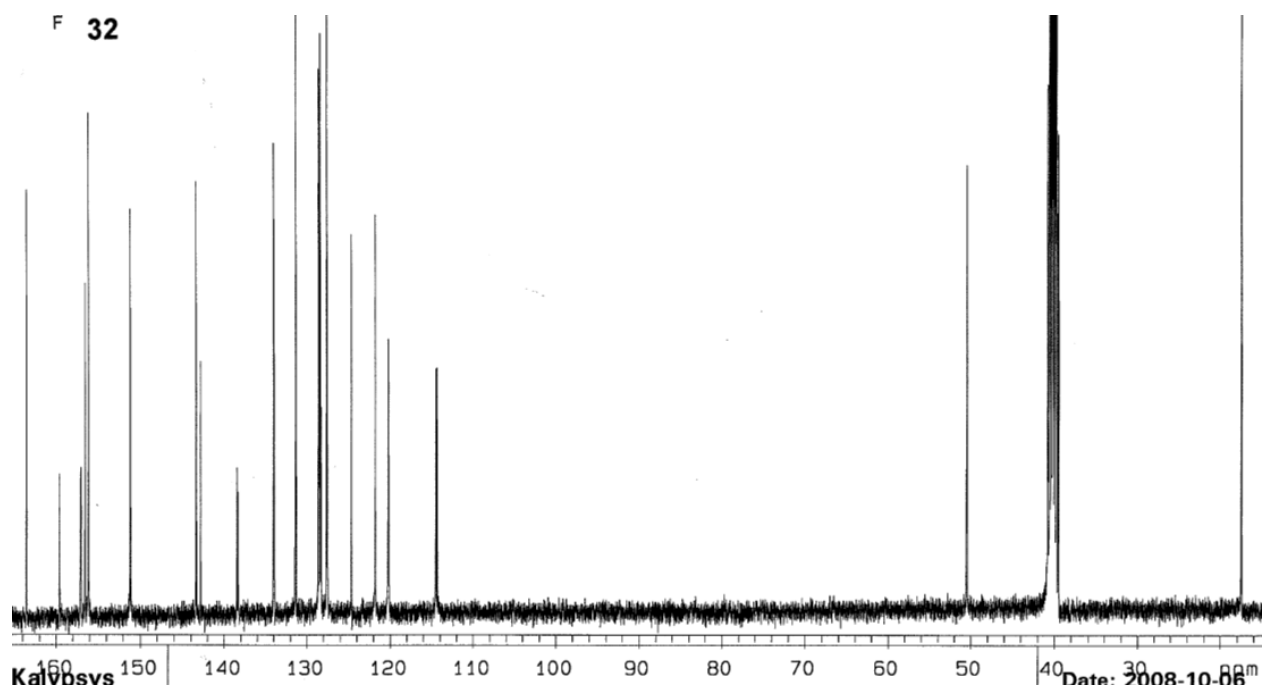

Injection Date : 8/14/2008 3:33:52 PM Seq. Line : 1  
Sample Name : Location : Vial 3  
Acq. Operator : 7 Inj : 1  
Acq. Instrument : Kalypsys Inj Volume : 5 µl  
Sequence File : C:\CHEM32\1\SEQUENCE\DEF LC2.S  
Method : C:\CHEM32\1\METHODS\1-95 LC.M  
Last changed : 8/14/2008 3:32:58 PM by 7  
1%-95% AcCN in H2O, .05%TFA

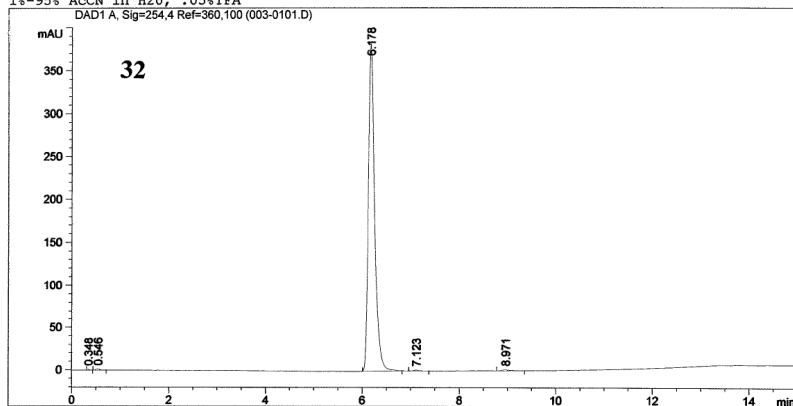

#### Area Percent Report

Sorted By : Signal  
Multiplier : 1.0000  
Dilution : 1.0000  
Use Multiplier & Dilution Factor with ISTDs

Signal 1: DAD1 A, Sig=254,4 Ref=360,100

| Peak # | RetTime [min] | Type | Width [min] | Area [mAU*s] | Height [mAU] | Area %  |
|--------|---------------|------|-------------|--------------|--------------|---------|
| 1      | 0.348         | BB   | 0.0559      | 5.04605      | 1.23030      | 0.1418  |
| 2      | 0.546         | BB   | 0.1076      | 10.31966     | 1.34320      | 0.2899  |
| 3      | 6.178         | BB   | 0.1393      | 3518.86621   | 382.50143    | 98.8519 |
| 4      | 7.123         | BB   | 0.1209      | 9.53856      | 1.22391      | 0.2680  |
| 5      | 8.971         | BB   | 0.1785      | 15.96533     | 1.14651      | 0.4485  |

Totals : 3559.73581 387.44535

### Compound 33: *N*-(3-Chlorophenyl)-*N*-((8-fluoroisoquinolin-4-yl)methyl)-4-methylthiazole-5-carboxamide

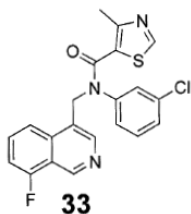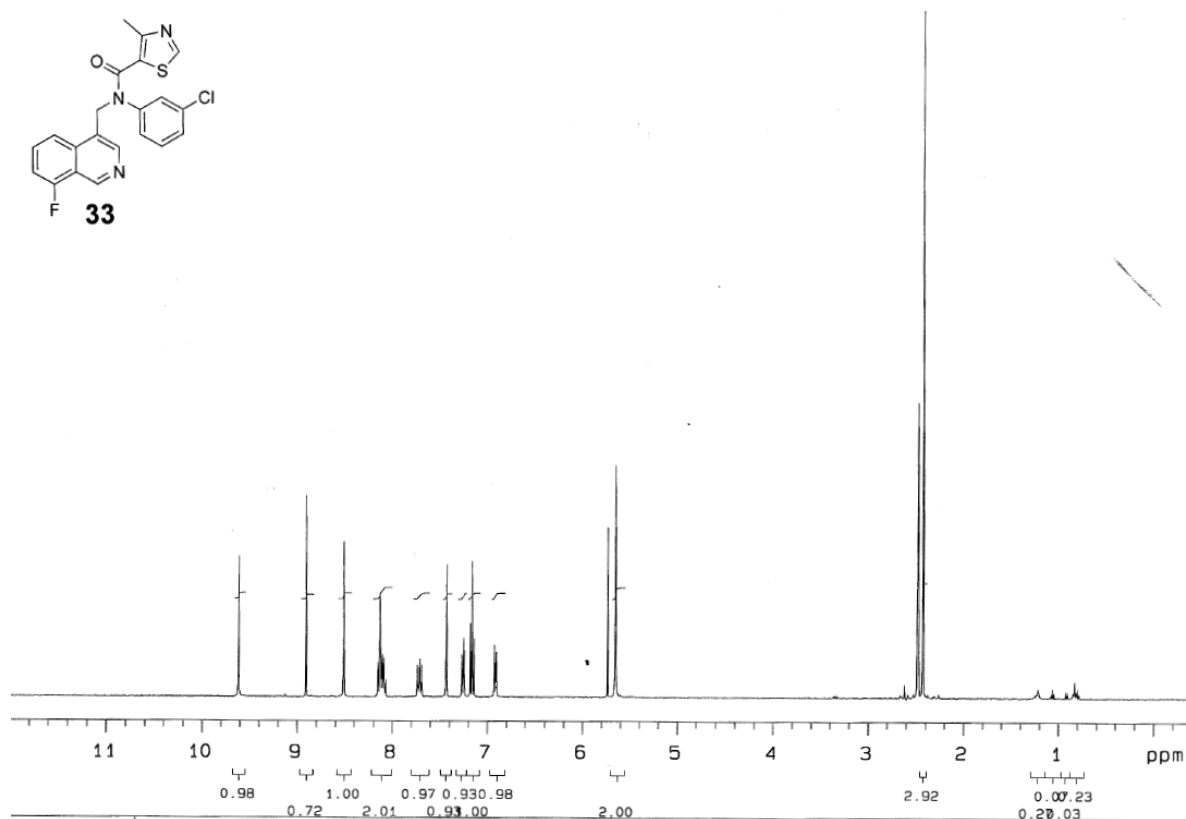

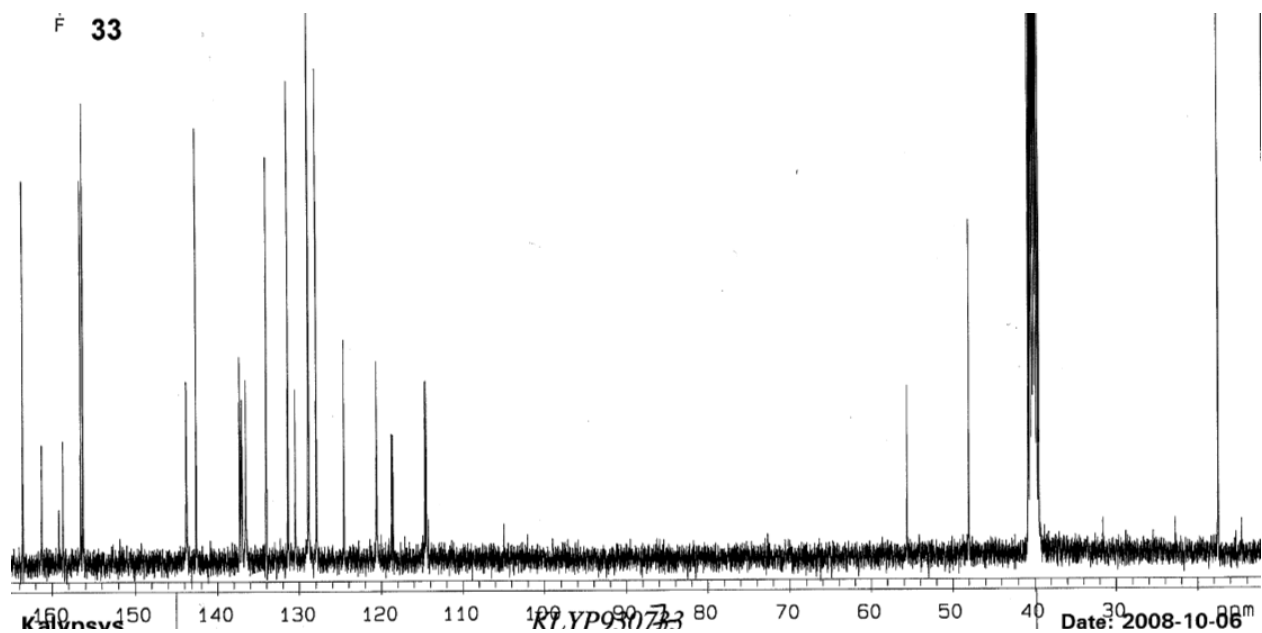

```

=====
Injection Date : 10/1/2008 4:44:33 PM      Seq. Line : 3
Sample Name    : K1.YP930743              Location  : Vial 23
Acq. Operator  : 1                        Inj       : 1
Acq. Instrument: Kalypsys                  Inj Volume: 5 µl
Sequence File  : C:\CHEM32\1\SEQUENCE\DEF_LC2.S
Method         : C:\CHEM32\1\METHODS\1-95_LC.M
Last changed   : 10/1/2008 4:09:37 PM by 1
1%-95% AcCN in H2O, .05%TFA
DAD1 B, Sig=254,16 Ref=360,100 (023-0301.D)

```

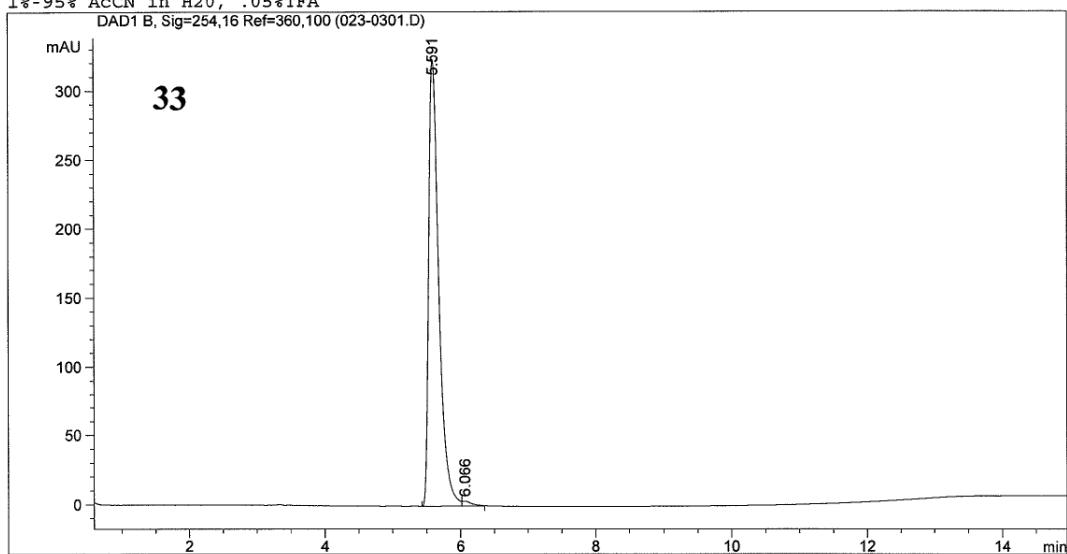

# Area Percent Report

```

=====
Sorted By      : Signal
Multiplier     : 1.0000
Dilution       : 1.0000
Use Multiplier & Dilution Factor with ISTDs

```

Signal 1: DAD1 B, Sig=254,16 Ref=360,100

| Peak # | RetTime [min] | Type | Width [min] | Area [mAU*s] | Height [mAU] | Area %  |
|--------|---------------|------|-------------|--------------|--------------|---------|
| 1      | 5.591         | BV   | 0.1579      | 3324.59595   | 323.44287    | 98.9476 |
| 2      | 6.066         | VB   | 0.1395      | 35.35905     | 3.57165      | 1.0524  |

Totals : 3359.95499 327.01452



**Compound 34: 4-((N-(3-Chlorophenyl)-4-methylthiazole-5-carboxamido)methyl)-8-fluoroisoquinoline 2-oxide**

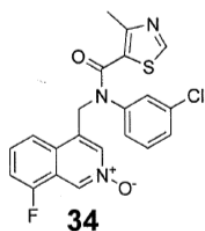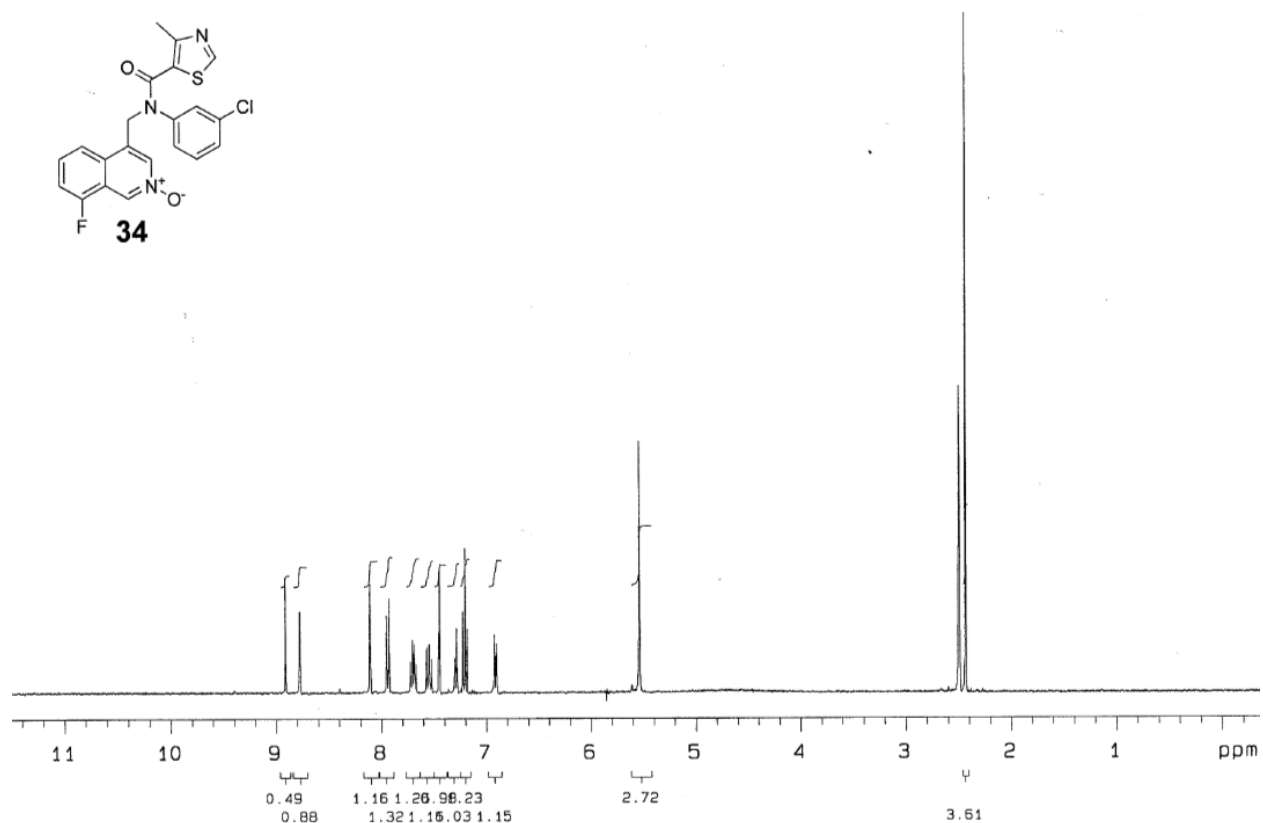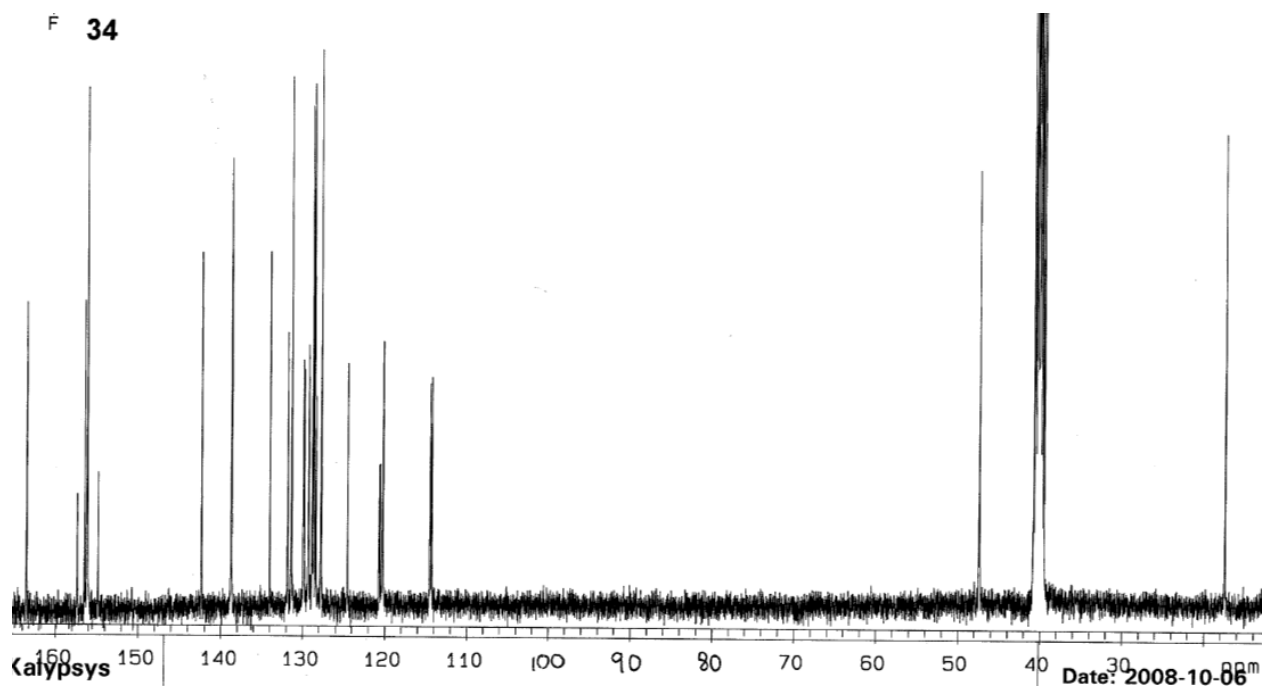

Injection Date : 8/14/2008 4:59:20 PM Seq. Line : 6  
 Sample Name : 353084 Location : Vial 8  
 Acq. Operator : 7 Inj : 1  
 Acq. Instrument : Kalypsys Inj Volume : 5 µl  
 Sequence File : C:\CHEM32\1\SEQUENCE\DEF\_LC2.S  
 Method : C:\CHEM32\1\METHODS\1-95\_LC.M  
 Last changed : 8/14/2008 3:32:58 PM by 7  
 1%-95% AcCN in H2O, .05%TFA

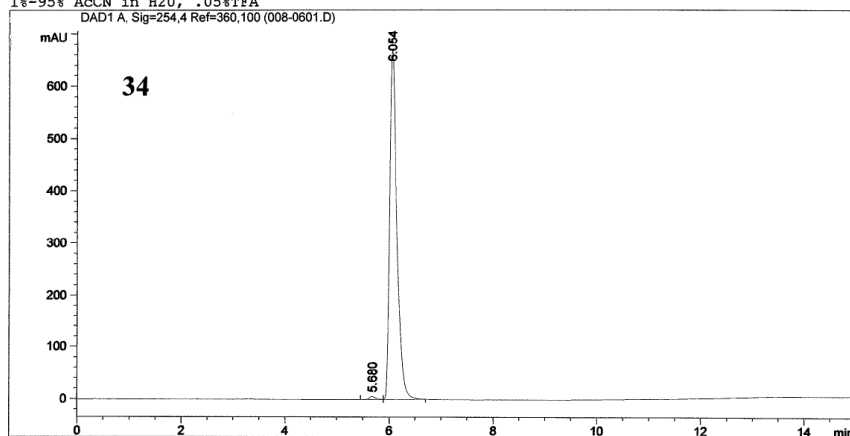

#### Area Percent Report

Sorted By : Signal  
 Multiplier : 1.0000  
 Dilution : 1.0000  
 Use Multiplier & Dilution Factor with ISTDs

Signal 1: DAD1 A, Sig=254,4 Ref=360,100

| Peak # | RetTime [min] | Type | Width [min] | Area [mAU*s] | Height [mAU] | Area %  |
|--------|---------------|------|-------------|--------------|--------------|---------|
| 1      | 5.680         | BV   | 0.1255      | 53.81546     | 6.30801      | 0.7916  |
| 2      | 6.054         | VB   | 0.1509      | 6744.15088   | 672.89453    | 99.2084 |

Totals : 6797.96634 679.20254

### Compound 35: *N*-(3-chlorophenyl)-4-methyl-*N*-((2-oxo-1,2-dihydroquinolin-4-yl)methyl)thiazole-5-carboxamide

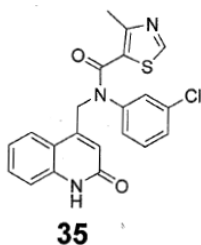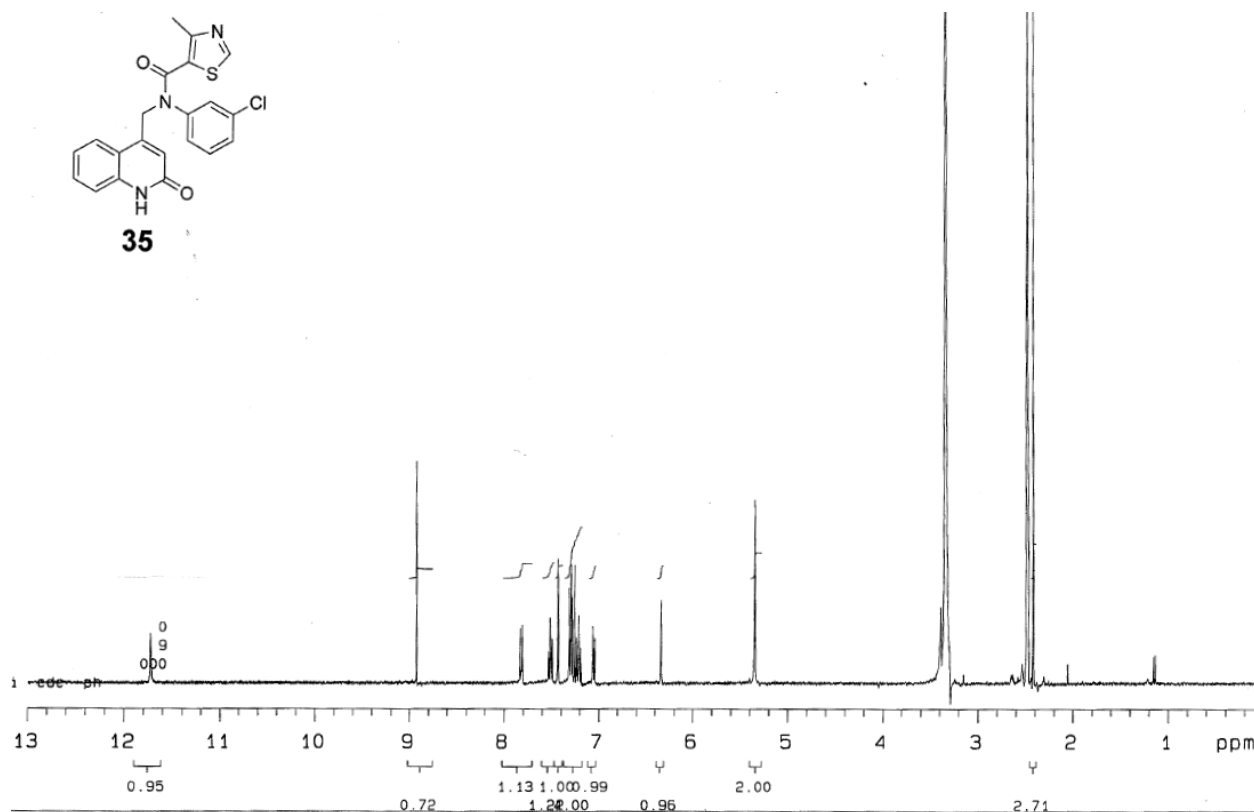

Injection Date : 12/20/2007 10:05:19 AM Seq. Line : 1  
 Sample Name : 36-111 Location : Vial 1  
 Acq. Operator : 14 Inj : 1  
 Acq. Instrument : Kalypsys Inj Volume : 2 µl  
 Sequence File : C:\CHEM32\1\SEQUENCE\DEF LC2.S  
 Method : C:\CHEM32\1\METHODS\1-95 LC.M  
 Last changed : 12/20/2007 10:02:24 AM by 14  
 1%-95% AcCN in H2O, .05%TFA  
 DAD1 D, Sig=225,16 Ref=360,100 (001-0101.D)

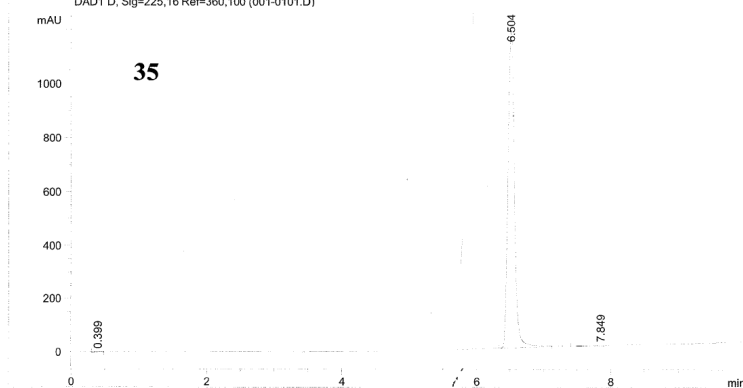

#### Area Percent Report

Sorted By : Signal  
 Multiplier : 1.0000  
 Dilution : 1.0000  
 Use Multiplier & Dilution Factor with ISTDs

Signal 1: DAD1 D, Sig=225,16 Ref=360,100

| Peak # | RetTime [min] | Type | Width [min] | Area [mAU*s] | Height [mAU] | Area %  |
|--------|---------------|------|-------------|--------------|--------------|---------|
| 1      | 0.399         | BB   | 0.0631      | 7.58044      | 1.66403      | 0.0924  |
| 2      | 6.504         | VB   | 0.1080      | 8110.57080   | 1182.15222   | 98.8637 |
| 3      | 7.849         | BV   | 0.2657      | 85.64225     | 4.54814      | 1.0439  |

Totals : 8203.79349 1188.36439

### Compound 36: *N*-((8-Chloro-2-oxo-1,2-dihydroquinolin-4-yl)methyl)-*N*-(3-chlorophenyl)-4-methylthiazole-5-carboxamide

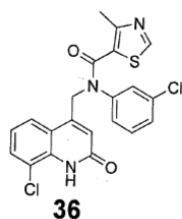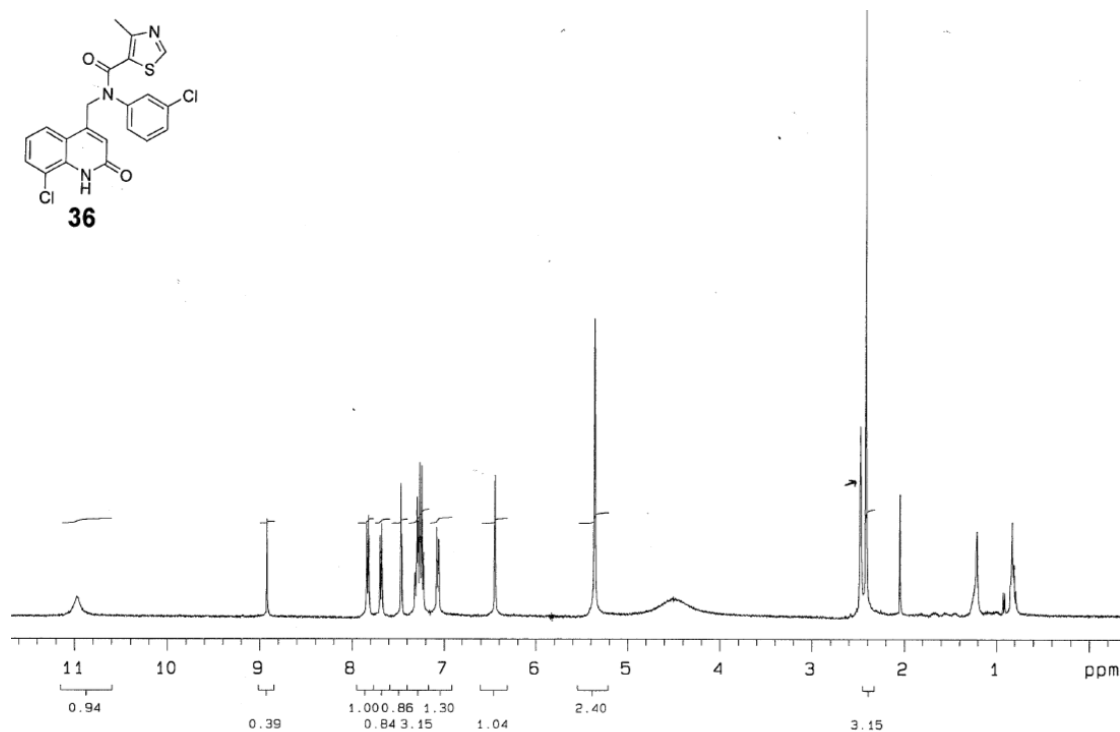

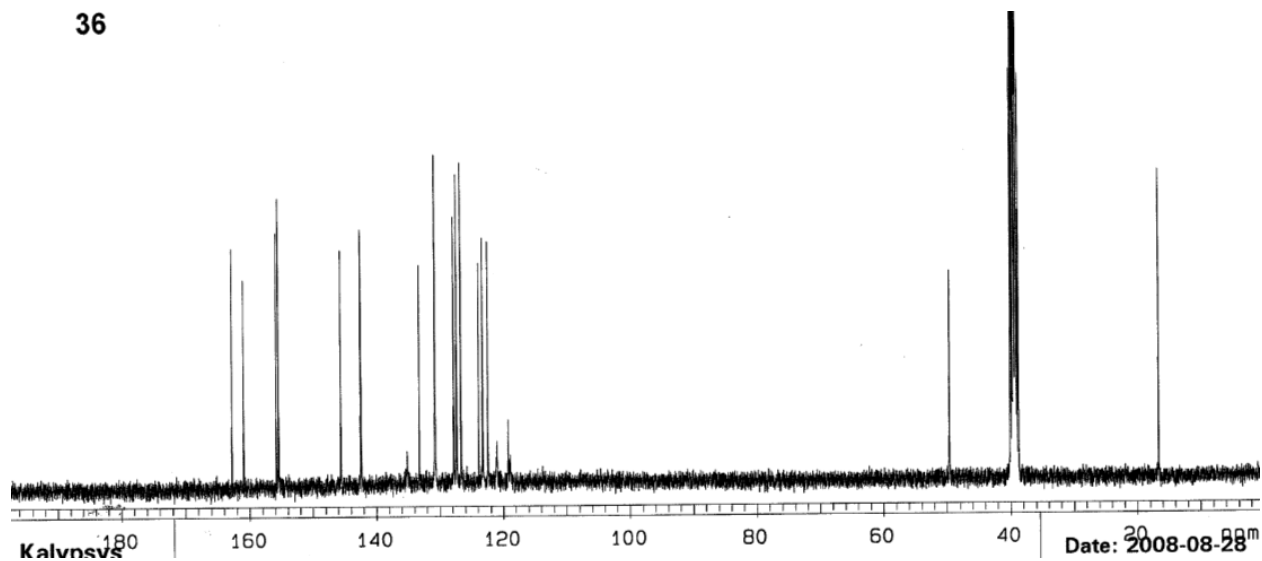

Injection Date : 8/14/2008 11:29:31 AM      Seq. Line : 1  
 Sample Name :      Location : Vial 1  
 Acq. Operator : 7      Inj : 1  
 Acq. Instrument : Kalypsys      Inj Volume : 5 µl  
 Sequence File : C:\CHEM32\1\SEQUENCE\DEF\_LC2.S  
 Method : C:\CHEM32\1\METHODS\1-95\_LC.M  
 Last changed : 8/14/2008 11:28:36 AM by 7  
 1%-95% AcCN in H2O, .05%TFA

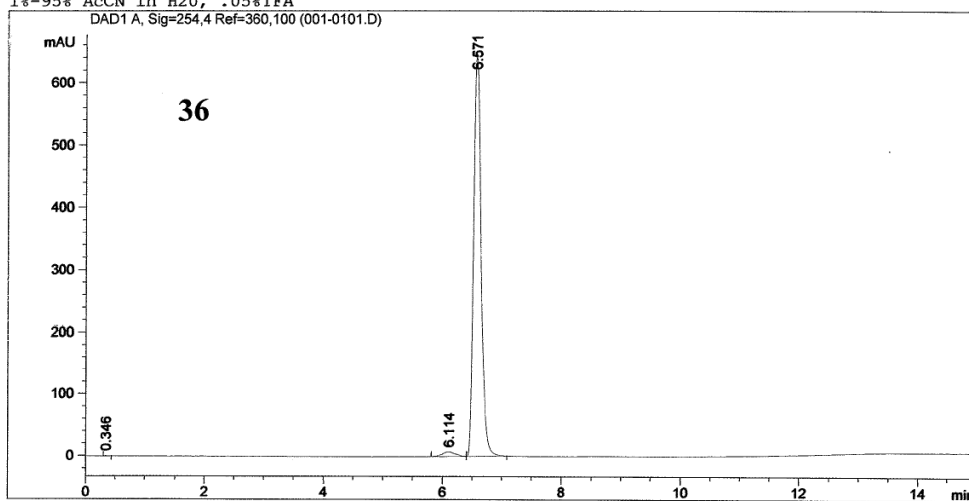

# Area Percent Report

Sorted By : Signal  
 Multiplier : 1.0000  
 Dilution : 1.0000  
 Use Multiplier & Dilution Factor with ISTDs

Signal 1: DAD1 A, Sig=254,4 Ref=360,100

| Peak # | RetTime [min] | Type | Width [min] | Area [mAU*s] | Height [mAU] | Area %  |
|--------|---------------|------|-------------|--------------|--------------|---------|
| 1      | 0.346         | BB   | 0.0540      | 5.09558      | 1.29184      | 0.0870  |
| 2      | 6.114         | BV   | 0.2265      | 118.75190    | 7.50753      | 2.0272  |
| 3      | 6.571         | VB   | 0.1377      | 5734.09131   | 644.85773    | 97.8858 |

Totals :                      5857.93879    653.65710

**Compound 37: N-(3-Chlorophenyl)-N-((7-fluoro-2-oxo-1,2-dihydroquinolin-4-yl)methyl)-4-methylthiazole-5-carboxamide**

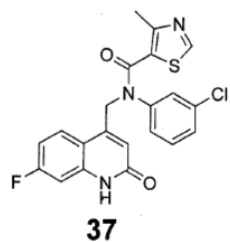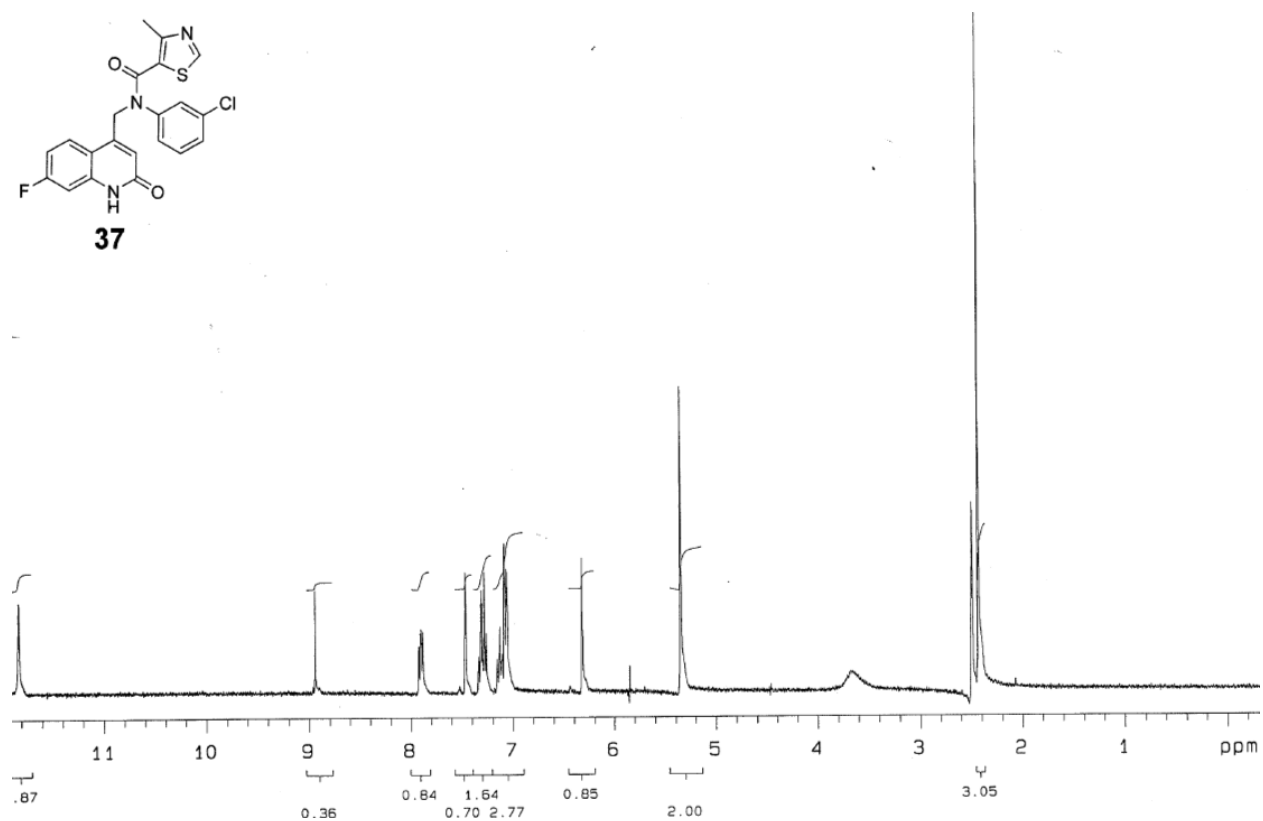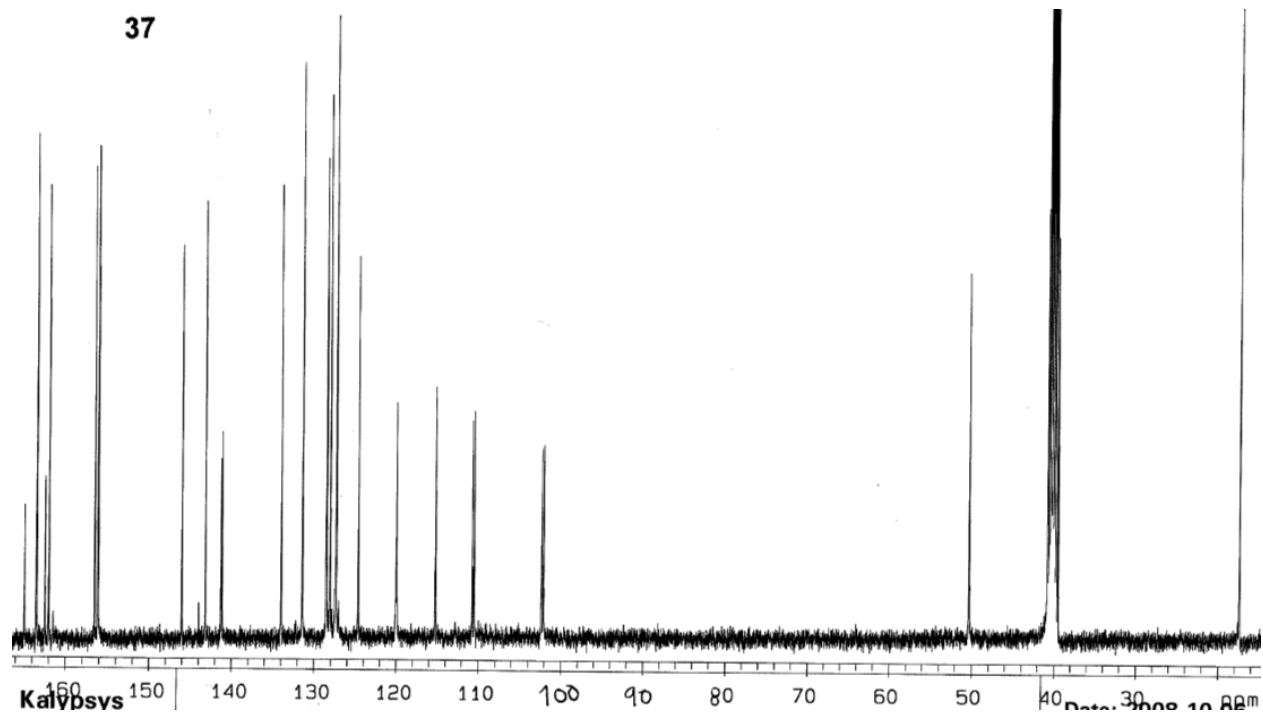

Injection Date : 11/1/2007 9:00:56 AM      Seq. Line : 2  
 Sample Name :      Location : Vial 2  
 Acq. Operator : 14      Inj : 1  
 Acq. Instrument : Kalypsys      Inj Volume : 5 µl  
 Sequence File : C:\CHEM32\1\SEQUENCE\DEF LC2.S  
 Method : C:\CHEM32\1\METHODS\1-95 LC.M  
 Last changed : 11/1/2007 8:47:36 AM by 14  
 (modified after loading)

1%-95% AcCN in H2O, .05%TFA

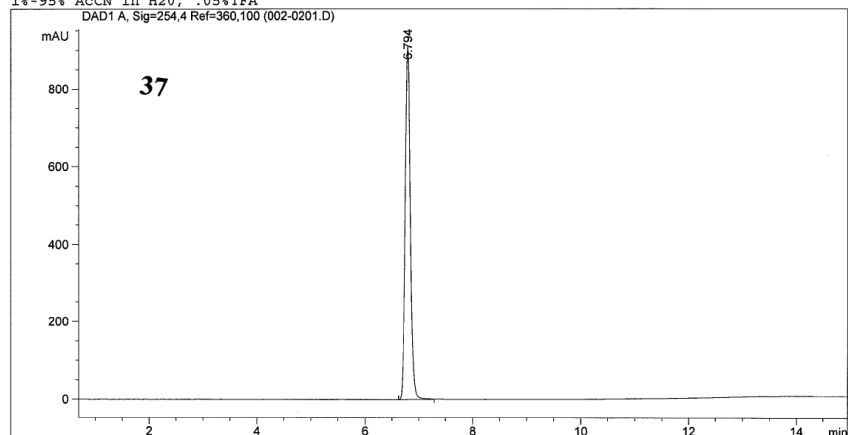

#### Area Percent Report

Sorted By : Signal  
 Multiplier : 1.0000  
 Dilution : 1.0000  
 Use Multiplier & Dilution Factor with ISTDs

Signal 1: DAD1 A, Sig=254,4 Ref=360,100

| Peak # | RetTime [min] | Type | Width [min] | Area [mAU*s] | Height [mAU] | Area %   |
|--------|---------------|------|-------------|--------------|--------------|----------|
| 1      | 6.794         | BB   | 0.1070      | 6161.84814   | 909.76367    | 100.0000 |

### Compound 38: *N*-(3-chlorophenyl)-*N*-((6-fluoro-2-oxo-1,2-dihydroquinolin-4-yl)methyl)-4-methylthiazole-5-carboxamide

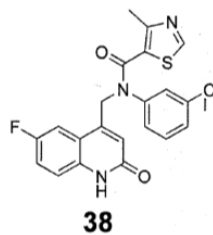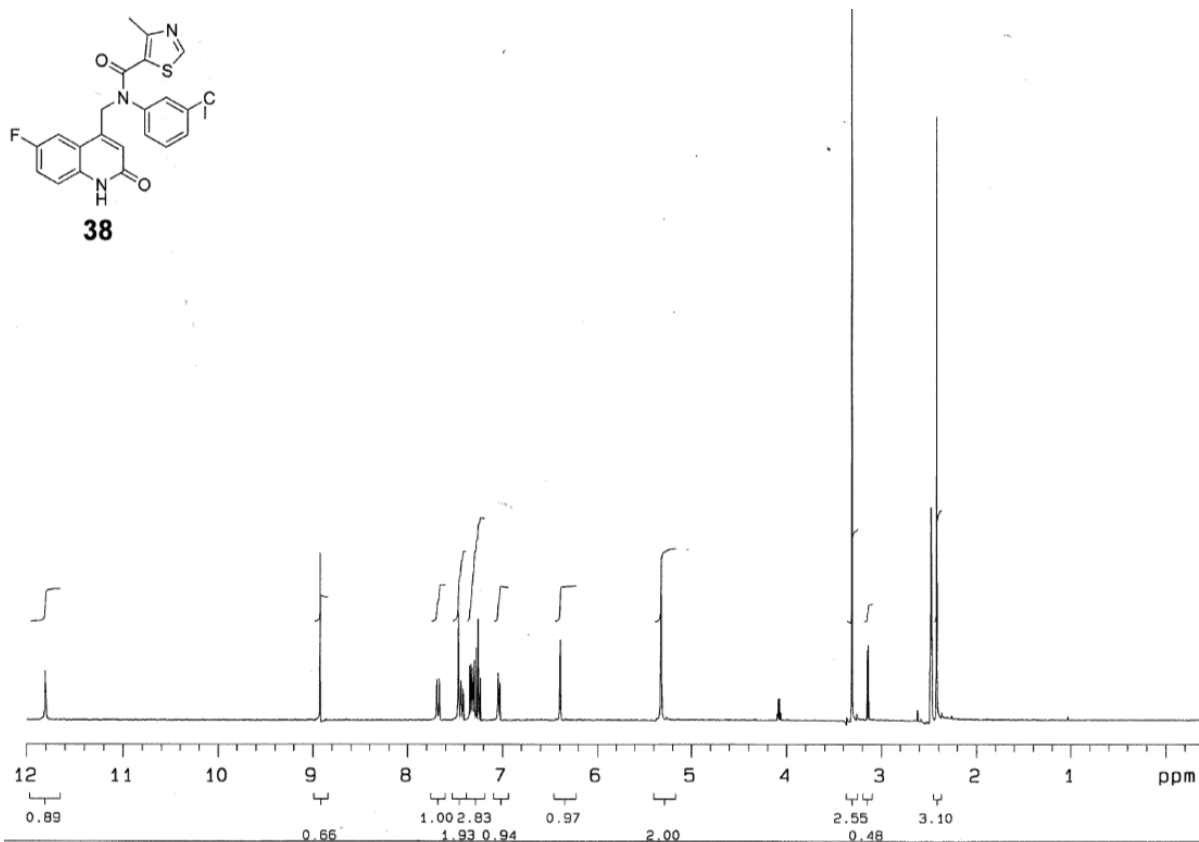

38

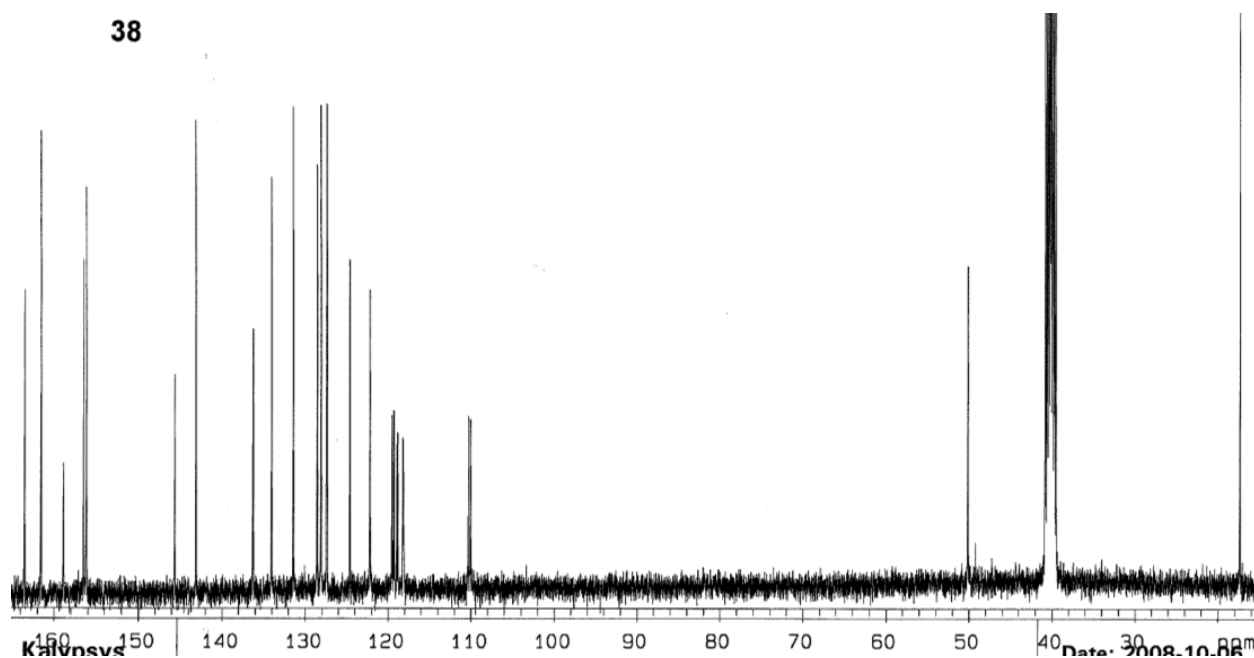

```

=====
Injection Date   : 10/31/2007 4:37:56 PM      Seq. Line :    5
Sample Name     : 8-330-22056              Location  : Vial 15
Acq. Operator   : 14                      Inj       :    1
Acq. Instrument : Kalypsys                 Inj Volume: 5 µl
Sequence File   : C:\CHEM32\1\SEQUENCE\DEF_LC2.S
Method          : C:\CHEM32\1\METHODS\1-95_LC.M
Last changed    : 10/31/2007 4:08:49 PM by 14
                  (modified after loading)

```

1%-95% AcCN in H2O, .05%TFA  
DAD1 A, Sig=254,4 Ref=360,100 (015-0501.D)

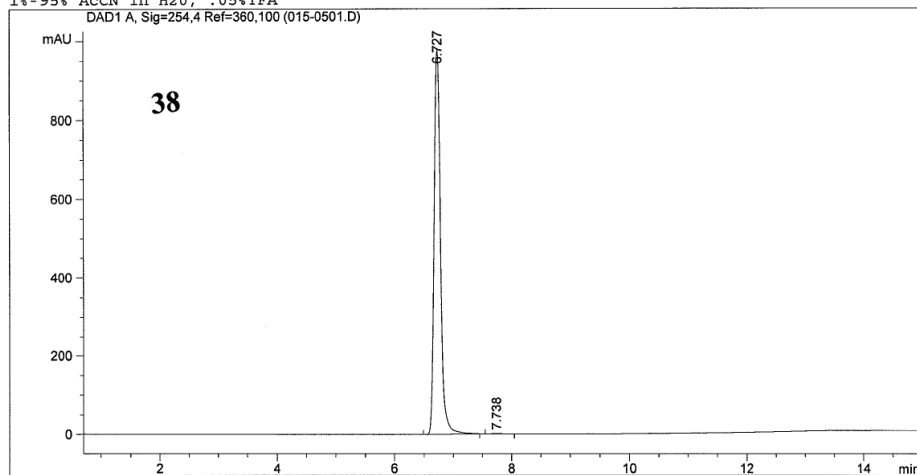

# Area Percent Report

```

=====
Sorted By       : Signal
Multiplier      : 1.0000
Dilution        : 1.0000
Use Multiplier & Dilution Factor with ISTDs

```

Signal 1: DAD1 A, Sig=254,4 Ref=360,100

| Peak # | RetTime [min] | Type | Width [min] | Area [mAU*s] | Height [mAU] | Area %  |
|--------|---------------|------|-------------|--------------|--------------|---------|
| 1      | 6.727         | VB   | 0.1187      | 7429.33447   | 977.27155    | 99.8732 |
| 2      | 7.738         | BB   | 0.1415      | 9.43596      | 1.15217      | 0.1268  |

Totals : 7438.77044 978.42371

**Compound 39: N-(3-Chlorophenyl)-N-((5-fluoro-2-oxo-1,2-dihydroquinolin-4-yl)methyl)-4-methylthiazole-5-carboxamide**

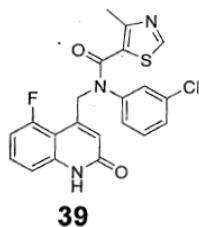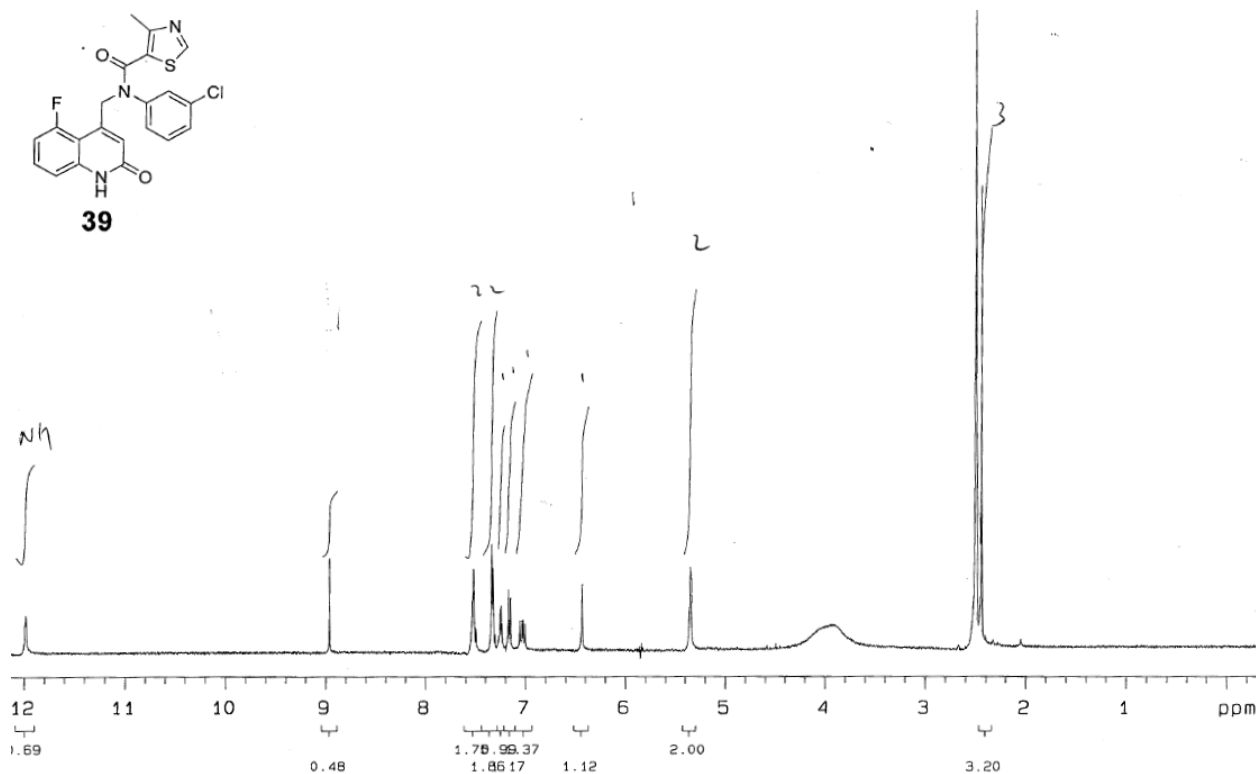

Injection Date : 11/2/2007 3:20:00 PM Seq. Line : 1  
Sample Name : KLYP00930563 Location : Vial 21  
Acq. Operator : 14 Inj : 1  
Acq. Instrument : Kalypsys Inj Volume : 5 µl  
Sequence File : C:\CHEM32\1\SEQUENCE\DEF\_LC2.S  
Method : C:\CHEM32\1\METHODS\1-95\_LC.M  
Last changed : 11/2/2007 3:18:26 PM by 14  
1% 95% AcCN in H2O, .05% TFA

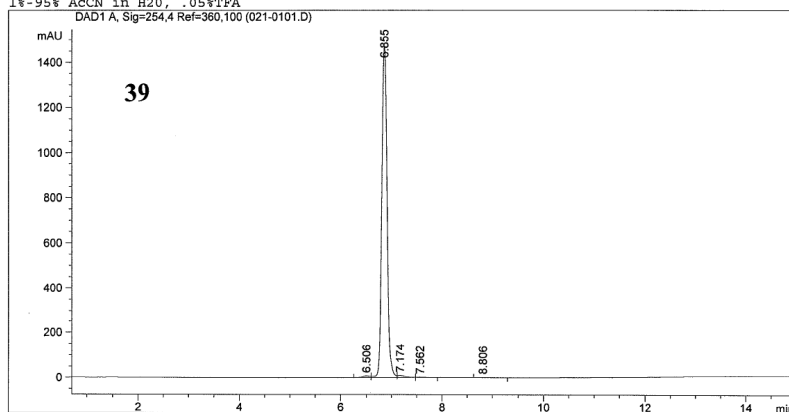

**Area Percent Report**

Sorted By : Signal  
Multiplier : 1.0000  
Dilution : 1.0000  
Use Multiplier & Dilution Factor with ISTDs

Signal 1: DAD1 A, Sig=254.4 Ref=360.100

| Peak # | RetTime [min] | Type | Width [min] | Area [mAU*s] | Height [mAU] | Area %  |
|--------|---------------|------|-------------|--------------|--------------|---------|
| 1      | 6.506         | VV   | 0.1451      | 88.75094     | 8.99890      | 0.8156  |
| 2      | 6.855         | VV   | 0.1160      | 1.06199e4    | 1474.15771   | 97.5994 |
| 3      | 7.174         | VV   | 0.1705      | 118.12183    | 10.24750     | 1.0856  |
| 4      | 7.562         | VB   | 0.1791      | 29.25771     | 2.17250      | 0.2689  |
| 5      | 8.806         | BB   | 0.2285      | 25.08071     | 1.62121      | 0.2305  |

Totals : 1.08811e4 1497.19783



**Compound 40: N-(3-Chlorophenyl)-N-((7,8-difluoro-2-oxo-1,2-dihydroquinolin-4-yl)methyl)-4-methylthiazole-5-carboxamide**

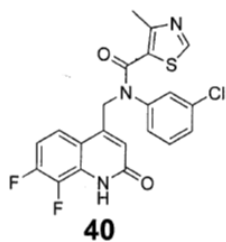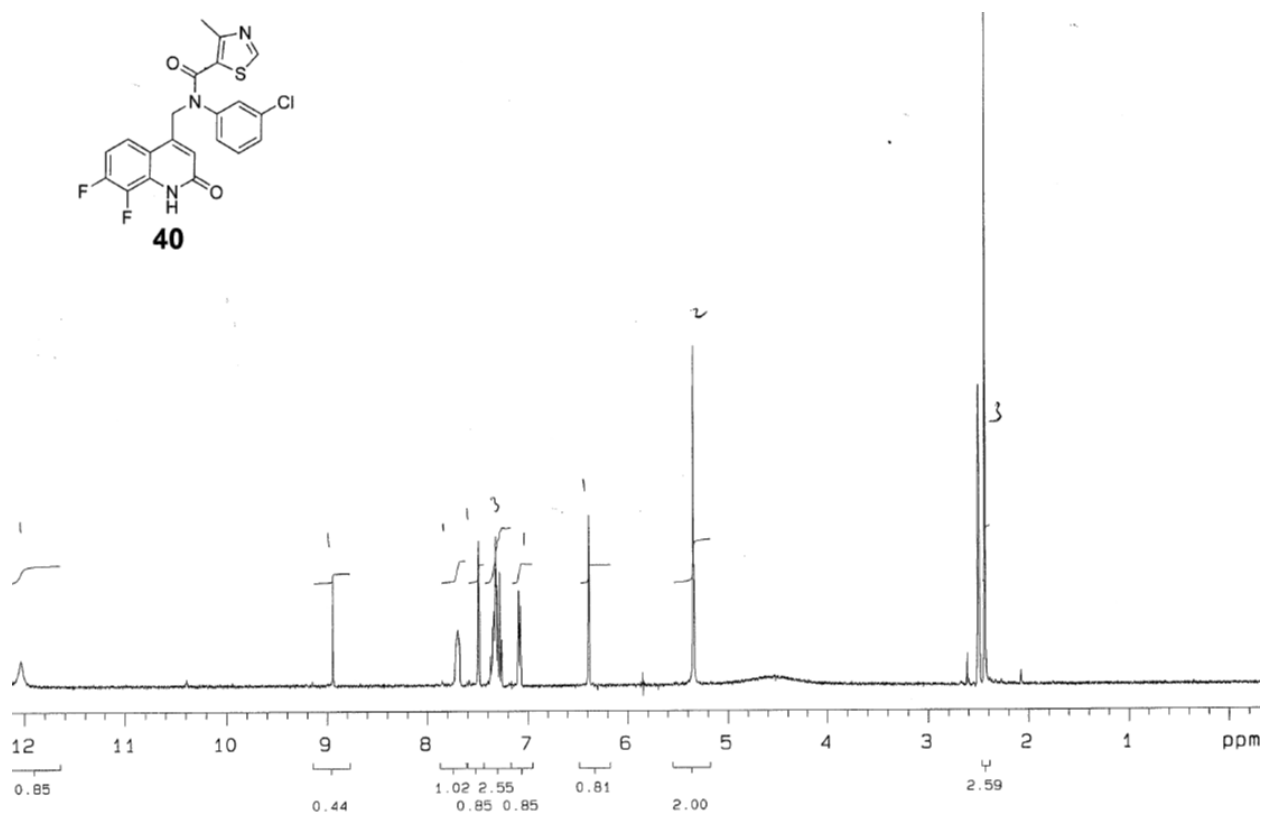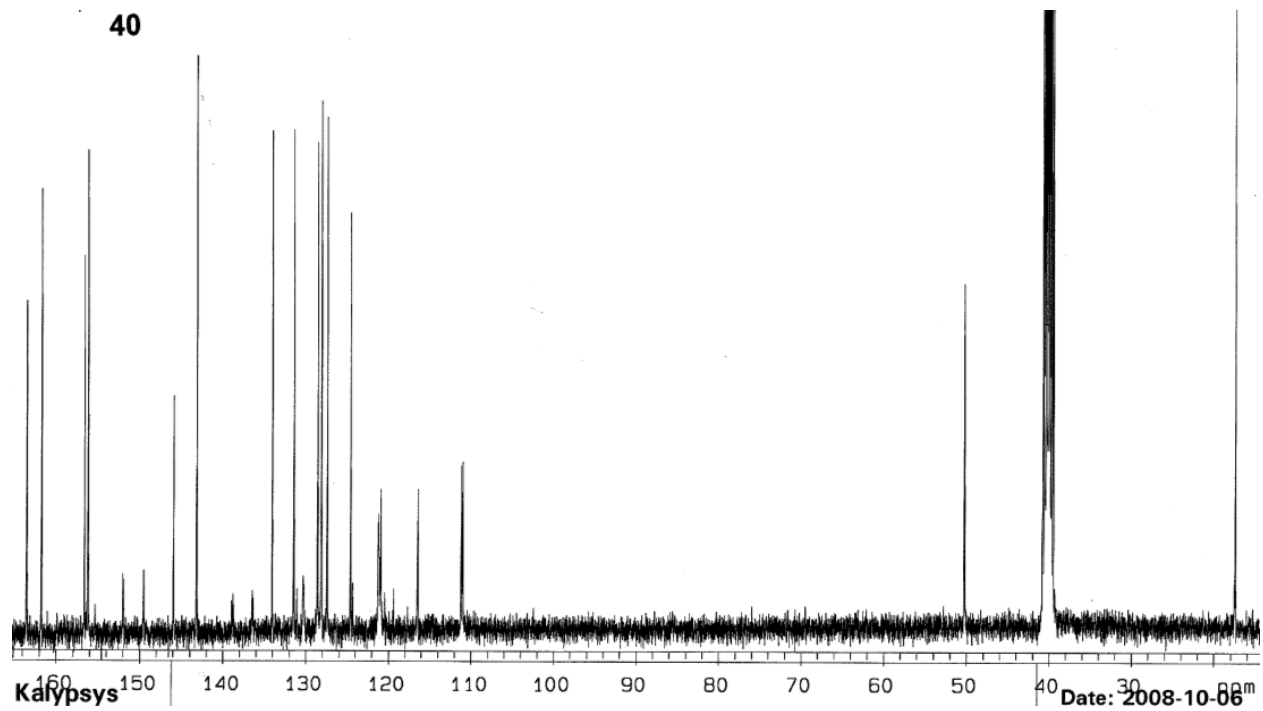

Injection Date : 10/31/2007 4:20:14 PM Seq. Line : 4  
 Sample Name : KIMP0092994 Location : Vial 14  
 Acq. Operator : 14 Inj : 1  
 Acq. Instrument : Kalypsys Inj Volume : 5 µl  
 Sequence File : C:\CHEM32\1\SEQUENCE\DEF\_LC2.S  
 Method : C:\CHEM32\1\METHODS\1-95\_LC.M  
 Last changed : 10/31/2007 4:08:49 PM by 14  
 (modified after loading)

1%-95% AcCN in H2O, .05%TFA

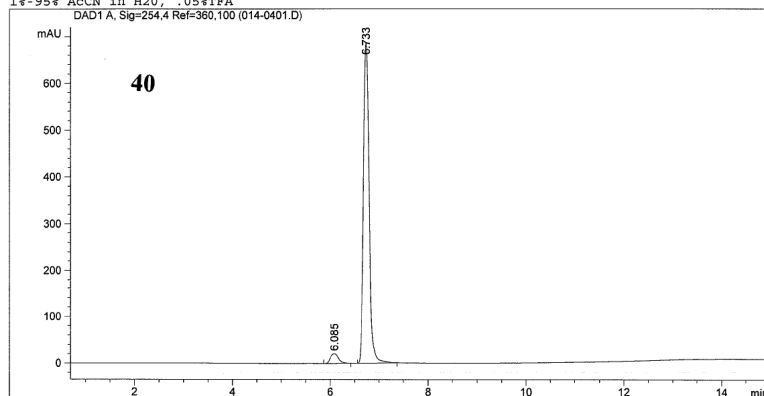

#### Area Percent Report

Sorted By : Signal  
 Multiplier : 1.0000  
 Dilution : 1.0000  
 Use Multiplier & Dilution Factor with ISTDs

Signal 1: DAD1 A, Sig=254.4 Ref=360.100

| Peak # | RetTime [min] | Type | Width [min] | Area [mAU*s] | Height [mAU] | Area %  |
|--------|---------------|------|-------------|--------------|--------------|---------|
| 1      | 6.085         | BB   | 0.1860      | 237.99170    | 20.41873     | 4.0796  |
| 2      | 6.733         | BB   | 0.1291      | 5595.63916   | 686.26837    | 95.9204 |

Totals : 5833.63086 706.68711

### Compound 41: *N*-(3-Chlorophenyl)-*N*-((7,8-difluoro-2-oxo-1,2-dihydroquinolin-4-yl)methyl)-4-methylnicotinamide

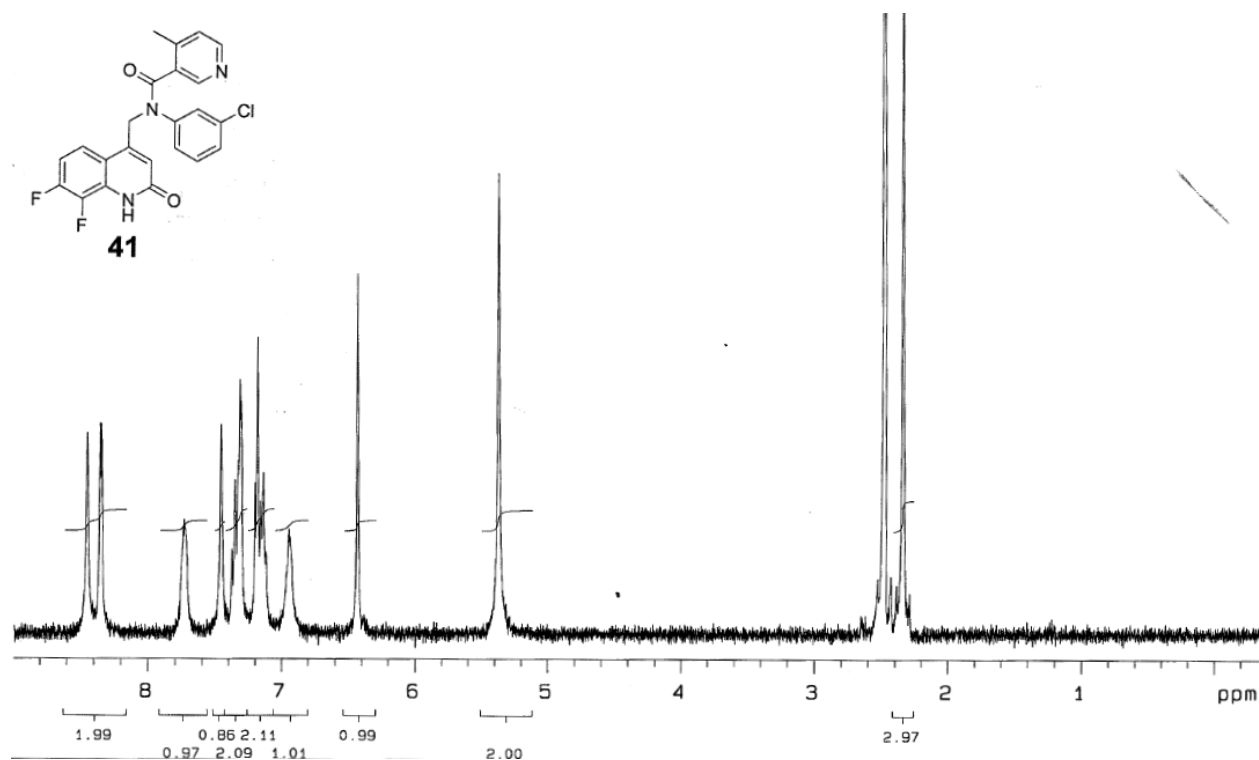

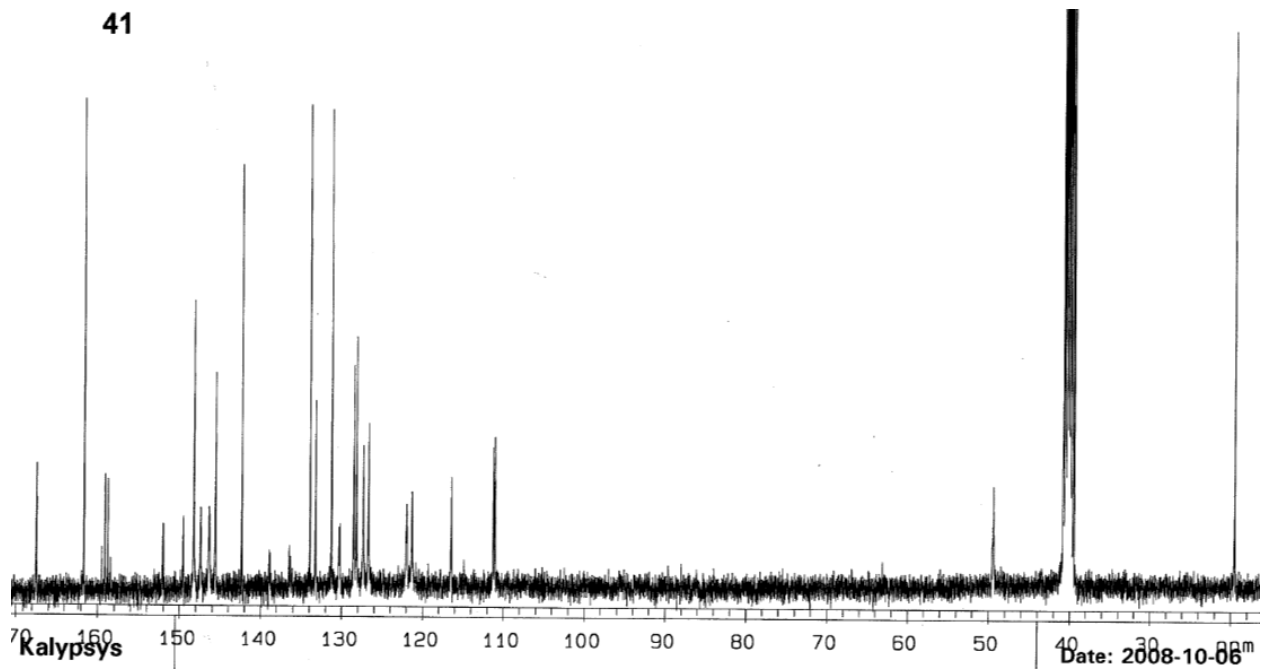

```

=====
Injection Date   : 8/21/2008 10:31:41 AM      Seq. Line :    6
Sample Name     : KALYP00930165             Location  : Vial 8
Acq. Operator   : 1                          Inj       :    1
Acq. Instrument : Kalypsys                    Inj Volume: 5 µl
Sequence File   : C:\CHEM32\1\SEQUENCE\DEF_LC2.S
Method          : C:\CHEM32\1\METHODS\1-95_LC.M
Last changed    : 8/21/2008 9:05:30 AM by 1
1%-95% AcCN in H2O, .05%TFA
  
```

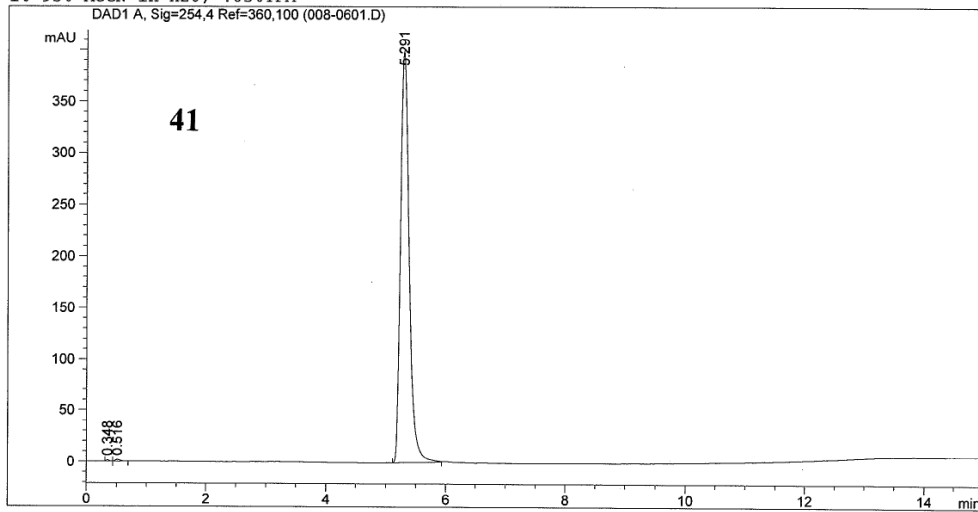

# Area Percent Report

```

=====
Sorted By       :      Signal
Multiplier      :      1.0000
Dilution        :      1.0000
Use Multiplier & Dilution Factor with ISTDs
  
```

Signal 1: DAD1 A, Sig=254,4 Ref=360,100

| Peak # | RetTime [min] | Type | Width [min] | Area [mAU*s] | Height [mAU] | Area %  |
|--------|---------------|------|-------------|--------------|--------------|---------|
| 1      | 0.348         | BV   | 0.0493      | 5.58121      | 1.65513      | 0.1385  |
| 2      | 0.516         | VB   | 0.1011      | 12.56408     | 1.80846      | 0.3119  |
| 3      | 5.291         | BB   | 0.1550      | 4010.66528   | 399.90155    | 99.5496 |

Totals :                      4028.81058   403.36513

**Compound 42: N-(3-Chlorophenyl)-N-((7,8-difluoro-2-oxo-1,2-dihydroquinolin-4-yl)methyl)-1-methyl-1H-imidazole-5-carboxamide**

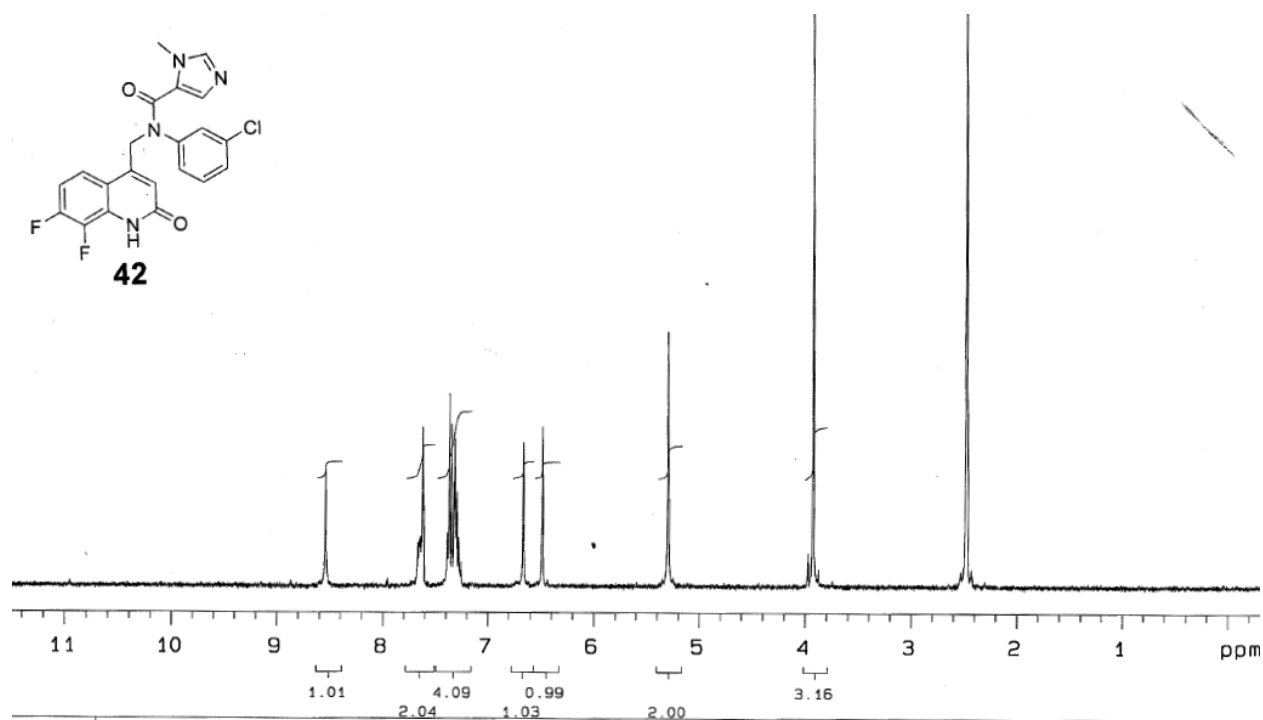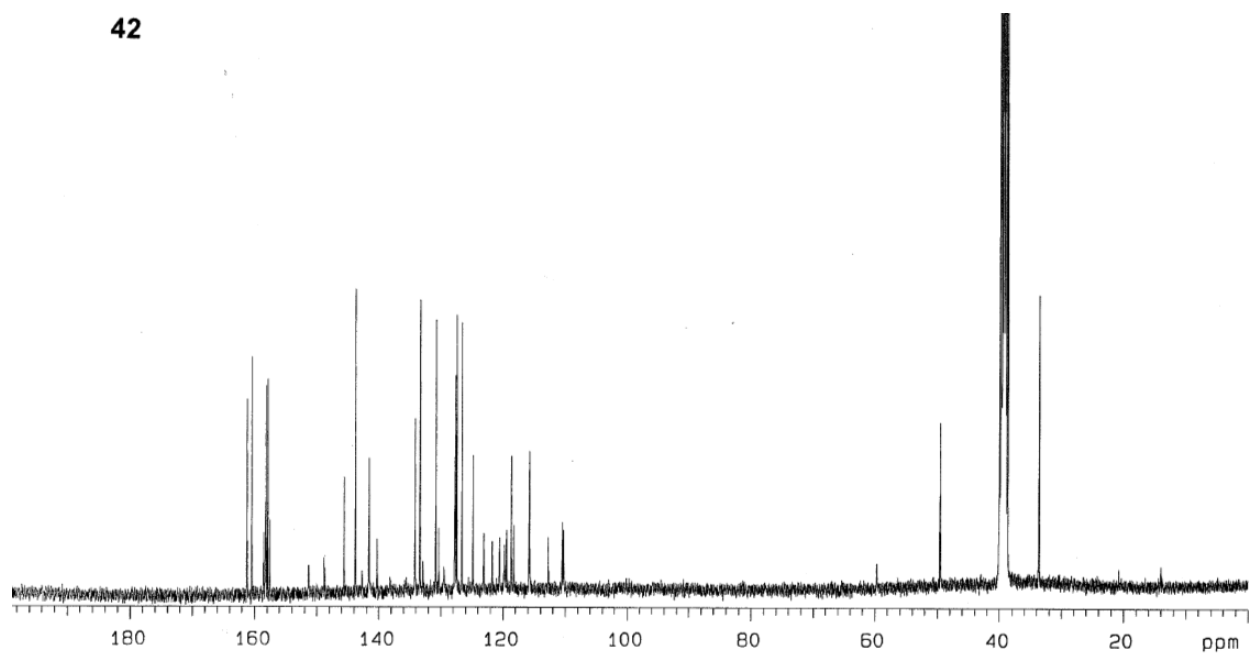

Injection Date : 10/19/2006 4:44:45 PM Seq. Line : 1  
 Sample Name : jsp336-087 Location : Vial 12  
 Acq. Operator : 12 Inj : 1  
 Acq. Instrument : Kalypsys Inj Volume : 5 µl  
 Sequence File : C:\CHEM32\1\SEQUENCE\DEF\_LC2.S  
 Method : C:\CHEM32\1\METHODS\1-95\_LC.M  
 Last changed : 10/19/2006 4:43:23 PM by 12  
 1%-95% AcCN in H2O, .05%TFA

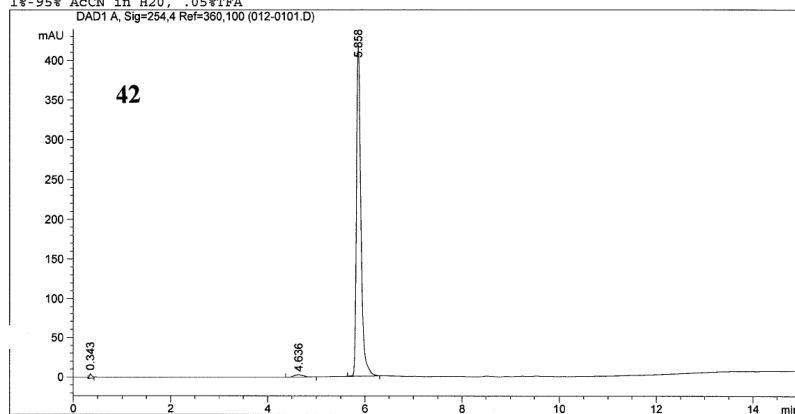

#### Area Percent Report

Sorted By : Signal  
 Multiplier : 1.0000  
 Dilution : 1.0000  
 Use Multiplier & Dilution Factor with ISTDs

Signal 1: DAD1 A, Sig=254,4 Ref=360,100

| Peak # | RetTime [min] | Type | Width [min] | Area [mAU*s] | Height [mAU] | Area %  |
|--------|---------------|------|-------------|--------------|--------------|---------|
| 1      | 0.343         | BV   | 0.0492      | 23.21497     | 6.26424      | 0.8574  |
| 2      | 4.636         | BB   | 0.2101      | 41.80192     | 3.04532      | 1.5438  |
| 3      | 5.858         | BB   | 0.0959      | 2642.70508   | 417.25275    | 97.5988 |

Totals : 2707.72197 426.56230

### Compound 43: *N*-(3-Chlorophenyl)-*N*-((7,8-difluoro-2-oxo-1,2-dihydroquinolin-4-yl)methyl)-3,5-dimethylisoxazole-4-carboxamide

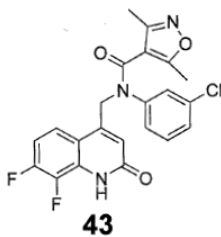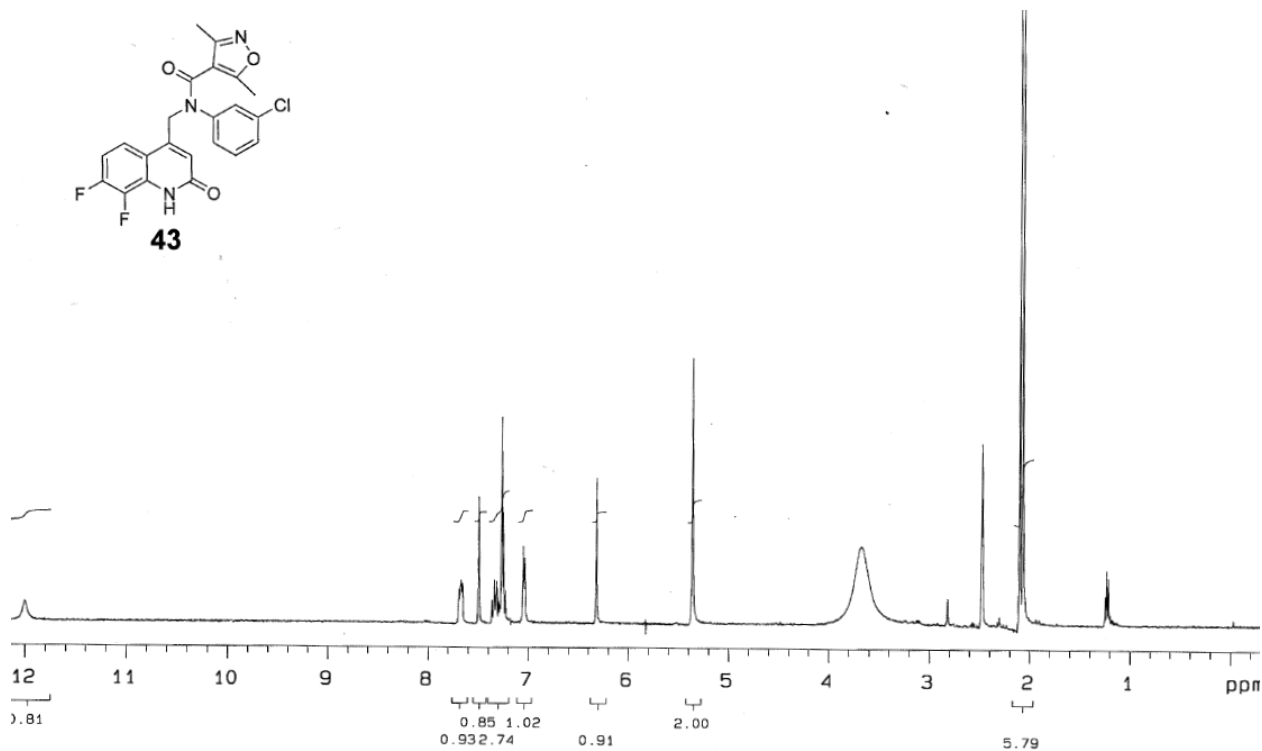

Injection Date : 9/17/2008 10:18:43 AM Seq. Line : 3  
 Sample Name : 44-99946 Location : Vial 13  
 Acq. Operator : 1 Inj : 1  
 Acq. Instrument : Kalypsys Inj Volume : 5 µl  
 Sequence File : C:\CHEM32\1\SEQUENCE\DEF\_LC2.S  
 Method : C:\CHEM32\1\METHODS\1-95\_LC.M  
 Last changed : 9/17/2008 9:43:27 AM by 1  
 1%-95% AcCN in H2O, .05%TFA

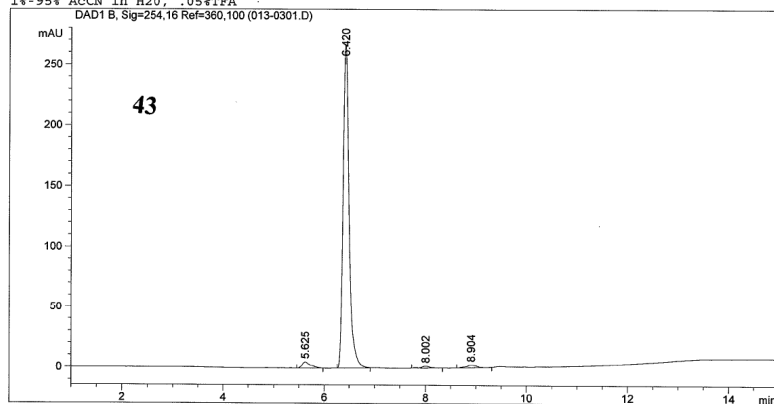

#### Area Percent Report

Sorted By : Signal  
 Multiplier : 1.0000  
 Dilution : 1.0000  
 Use Multiplier & Dilution Factor with ISTDs

Signal 1: DAD1 B, Sig=254,16 Ref=360,100

| Peak # | RetTime [min] | Type | Width [min] | Area [mAU*s] | Height [mAU] | Area %  |
|--------|---------------|------|-------------|--------------|--------------|---------|
| 1      | 5.625         | BB   | 0.1758      | 61.87328     | 5.08936      | 2.6711  |
| 2      | 6.420         | BB   | 0.1279      | 2200.80347   | 267.82324    | 95.0108 |
| 3      | 8.002         | BB   | 0.2029      | 22.16524     | 1.56772      | 0.9569  |
| 4      | 8.904         | BB   | 0.1949      | 31.52971     | 2.20464      | 1.3612  |

Totals : 2316.37169 276.68496

### Compound 44: N-(3-Chlorophenyl)-N-((3,8-difluoro-2-oxo-1,2-dihydroquinolin-4-yl)methyl)-4-methylthiazole-5-carboxamide

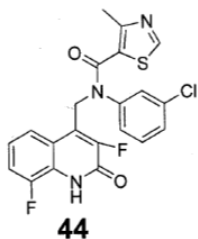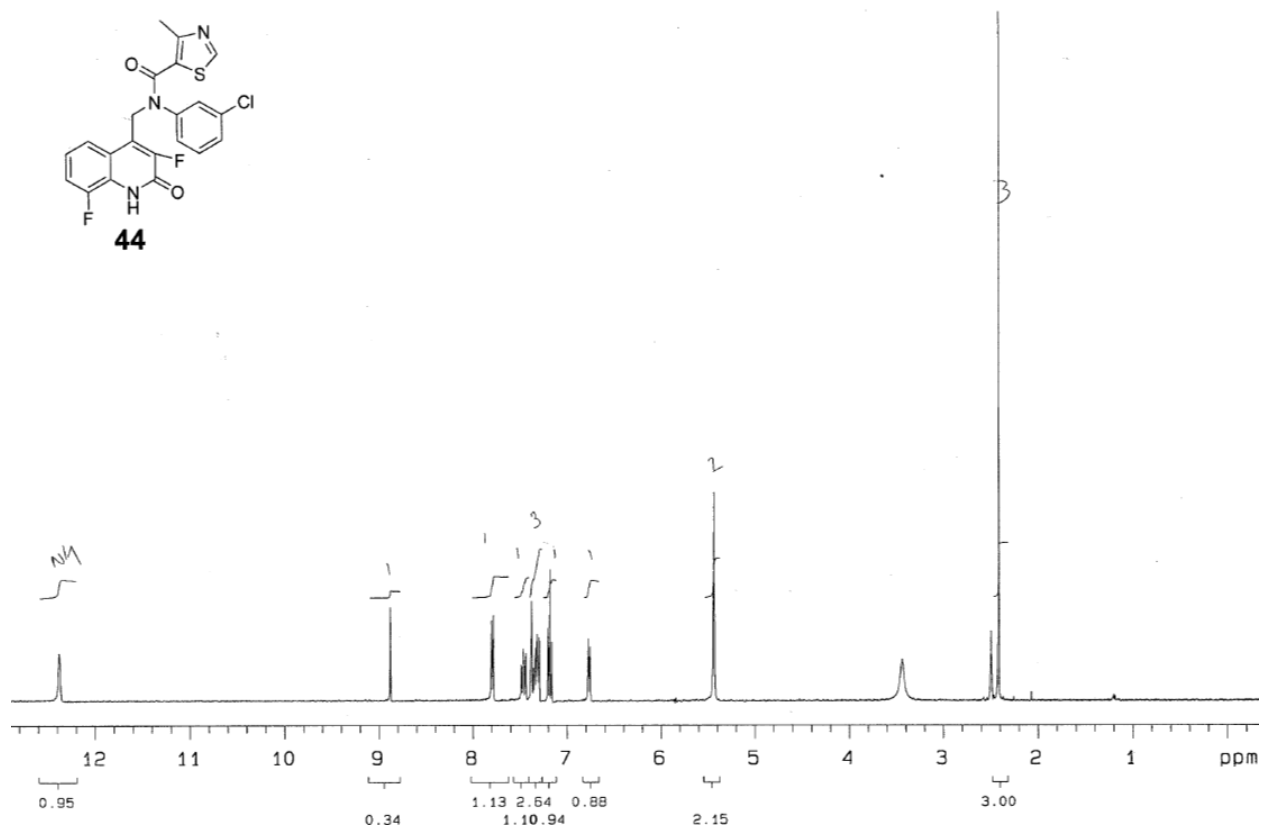

```

=====
Injection Date   : 9/16/2008 5:15:52 PM      Seq. Line :    3
Sample Name     : KALYPSO247                Location  : Vial 17
Acq. Operator   : 1                        Inj       :    1
Acq. Instrument : Kalypsys                  Inj Volume: 5 µl
Sequence File   : C:\CHEM32\1\SEQUENCE\DEF_LC2.S
Method          : C:\CHEM32\1\METHODS\1-95_LC.M
Last changed    : 9/16/2008 4:40:41 PM by 1
                  (modified after loading)
1%-95% AcCN in H2O, .05%TFA

```

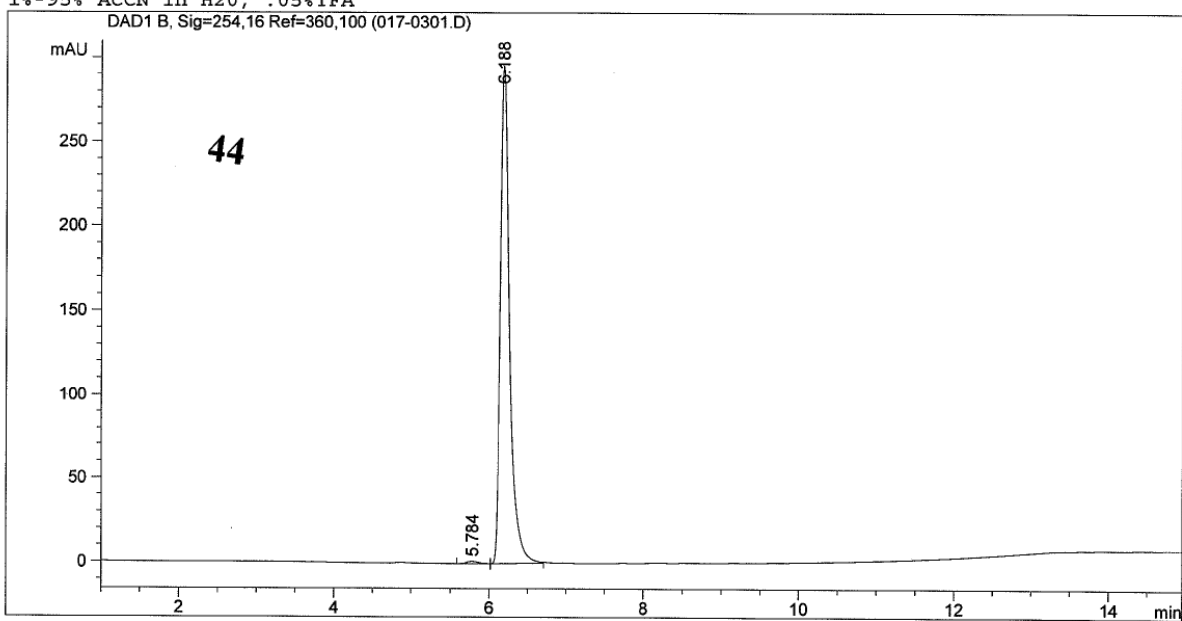

```

=====
                        Area Percent Report
=====

```

```

Sorted By           :      Signal
Multiplier          :      1.0000
Dilution            :      1.0000
Use Multiplier & Dilution Factor with ISTDs

```

Signal 1: DAD1 B, Sig=254,16 Ref=360,100

| Peak # | RetTime [min] | Type | Width [min] | Area [mAU*s] | Height [mAU] | Area %  |
|--------|---------------|------|-------------|--------------|--------------|---------|
| 1      | 5.784         | BV   | 0.1519      | 13.32413     | 1.34143      | 0.5392  |
| 2      | 6.188         | VB   | 0.1228      | 2457.83154   | 296.34518    | 99.4608 |

```
Totals :                      2471.15567  297.68662
```

**Compound 45: N-(3-Chlorophenyl)-N-((7,8-difluoro-2-oxo-2H-chromen-4-yl)methyl)-4-methylthiazole-5-carboxamide**

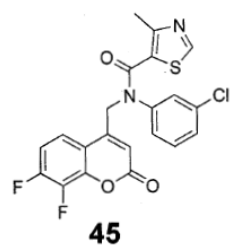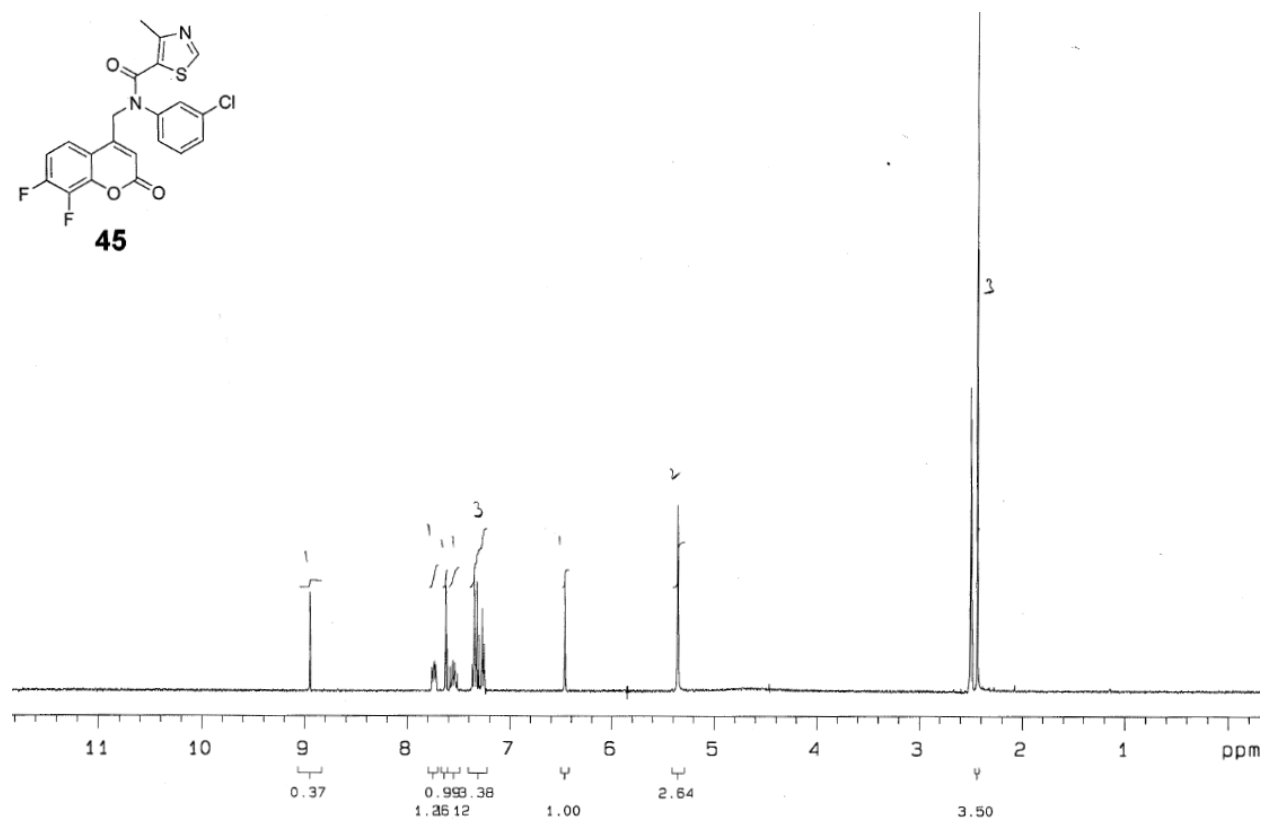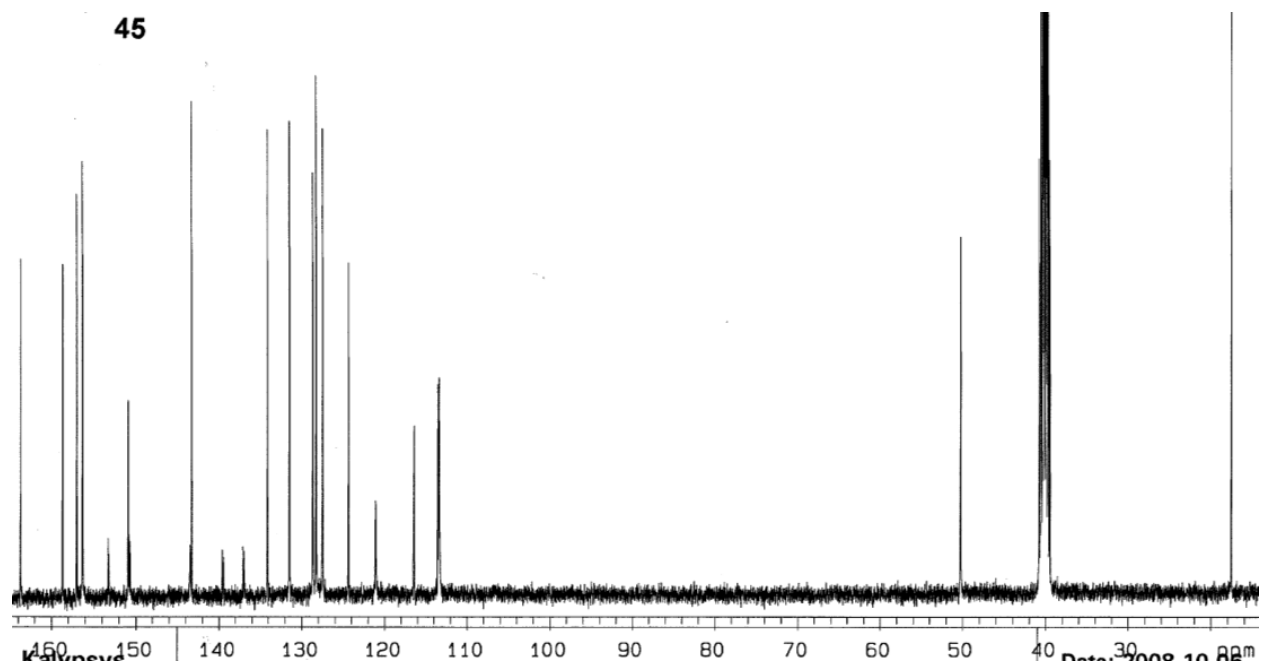



Injection Date : 8/25/2008 2:51:48 PM Seq. Line : 1  
 Sample Name : ~~XXXXXXXXXX~~ Location : Vial 13  
 Acq. Operator : 1 Inj : 1  
 Acq. Instrument : Kalypsys Inj Volume : 5 µl  
 Sequence File : C:\CHEM32\1\SEQUENCE\DEF\_IC2.S  
 Method : C:\CHEM32\1\METHODS\1-95\_IC.M  
 Last changed : 8/25/2008 2:50:32 PM by 1  
 1%-95% AcCN in H2O, 0.05%TFA

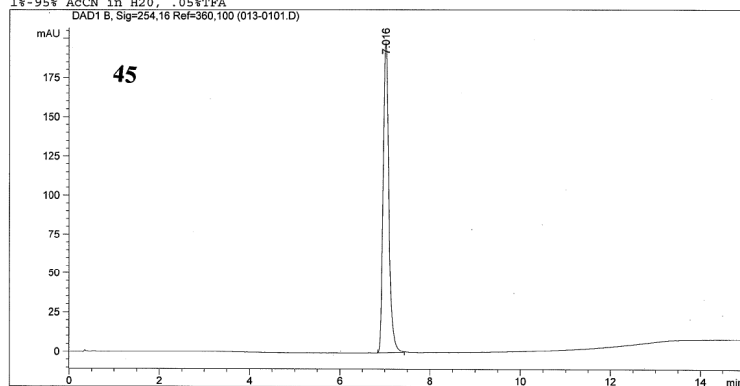

#### Area Percent Report

Sorted By : Signal  
 Multiplier : 1.0000  
 Dilution : 1.0000  
 Use Multiplier & Dilution Factor with ISTDs

Signal 1: DAD1 B, Sig=254,16 Ref=360,100

| Peak # | RetTime [min] | Type | Width [min] | Area [mAU*s] | Height [mAU] | Area %   |
|--------|---------------|------|-------------|--------------|--------------|----------|
| 1      | 7.016         | BB   | 0.1384      | 1735.29309   | 197.66359    | 100.0000 |

Totals : 1735.29309 197.66359

### Compound 46: *N*-(3-Chlorophenyl)-*N*-((7,8-difluoroisoquinolin-4-yl)methyl)-4-methylthiazole-5-carboxamide

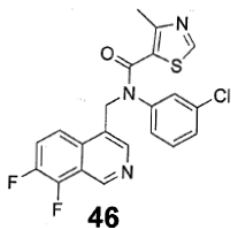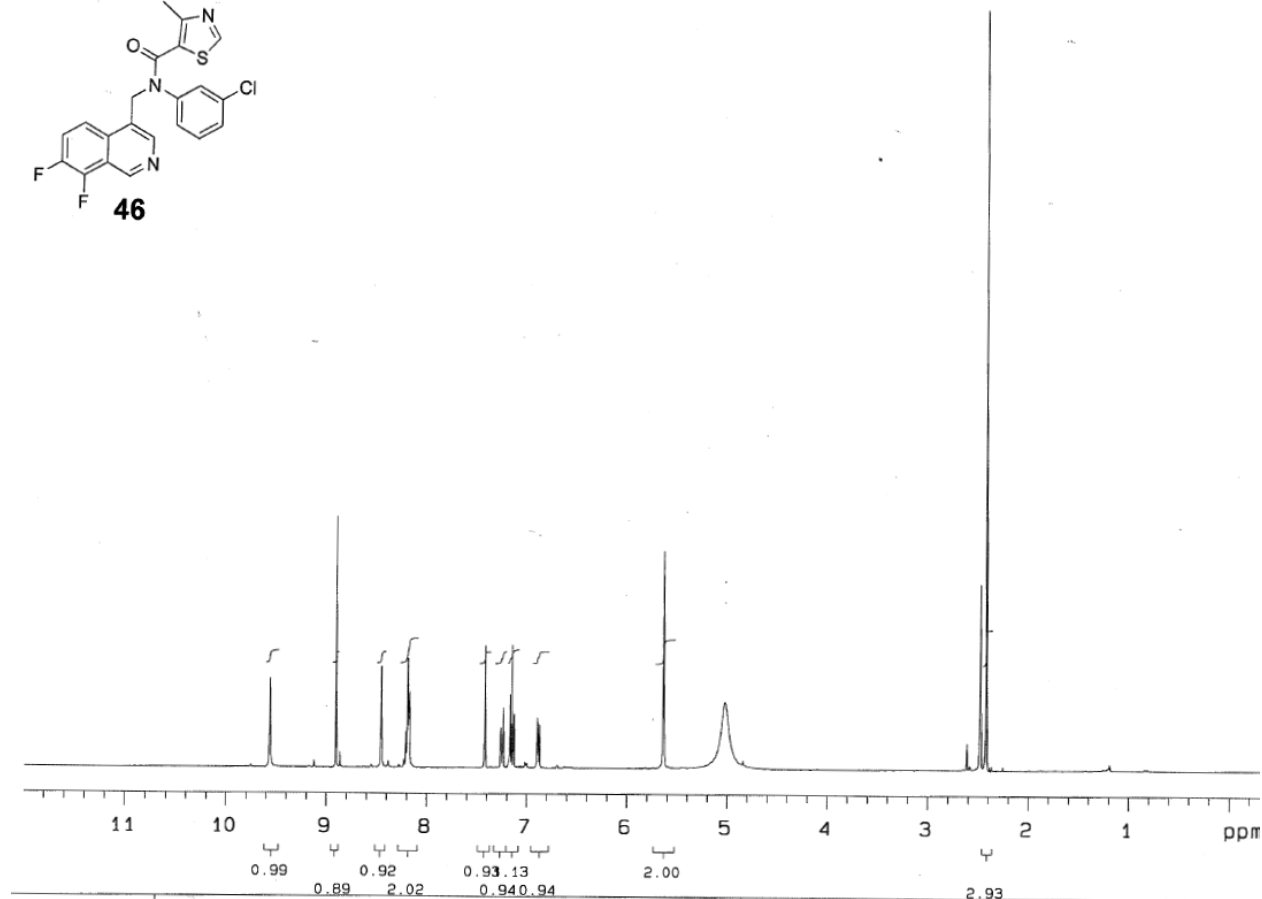

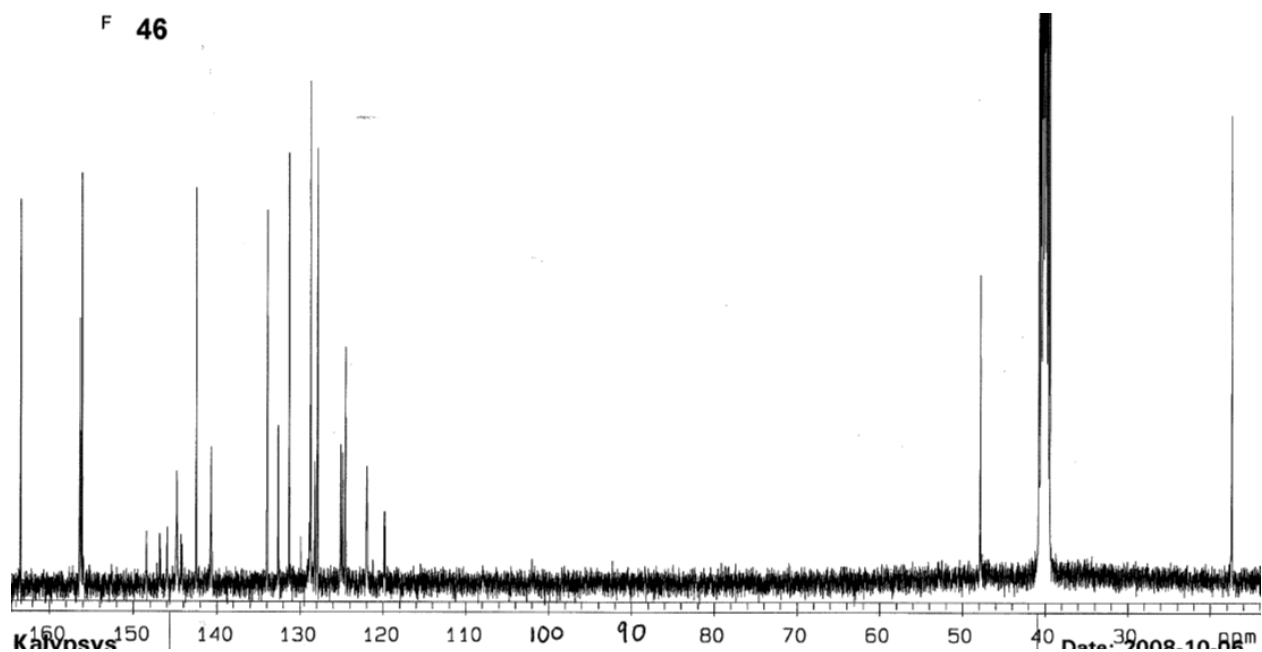

```

=====
Injection Date   : 9/17/2008 10:52:53 AM      Seq. Line :    5
Sample Name     : Klypsol153                 Location  : Vial 18
Acq. Operator   : 1                          Inj       :    1
Acq. Instrument : Kalypsys                     Inj Volume: 5 µl
Sequence File   : C:\CHEM32\1\SEQUENCE\DEF_LC2.S
Method          : C:\CHEM32\1\METHODS\1-95_LC.M
Last changed    : 9/17/2008 9:43:27 AM by 1
1%-95% AcCN in H2O, .05%TFA
  
```

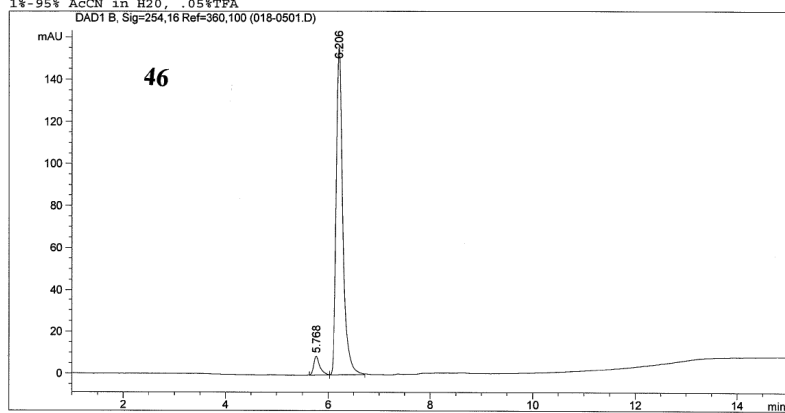

# Area Percent Report

```

=====
Sorted By      :      Signal
Multiplier     :      1.0000
Dilution       :      1.0000
Use Multiplier & Dilution Factor with ISTDs
  
```

Signal 1: DAD1 B, Sig=254,16 Ref=360,100

| Peak # | RetTime [min] | Type | Width [min] | Area [mAU*s] | Height [mAU] | Area %  |
|--------|---------------|------|-------------|--------------|--------------|---------|
| 1      | 5.768         | BV   | 0.1225      | 75.00073     | 9.07174      | 5.0770  |
| 2      | 6.206         | VB   | 0.1347      | 1402.25647   | 156.24416    | 94.9230 |

Totals : 1477.25720 165.31590

**Compound 47: 4-((N-(3-Chlorophenyl)-4-methylthiazole-5-carboxamido)methyl)-7,8-difluoroisoquinoline 2-oxide**

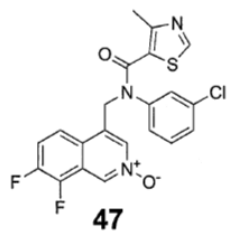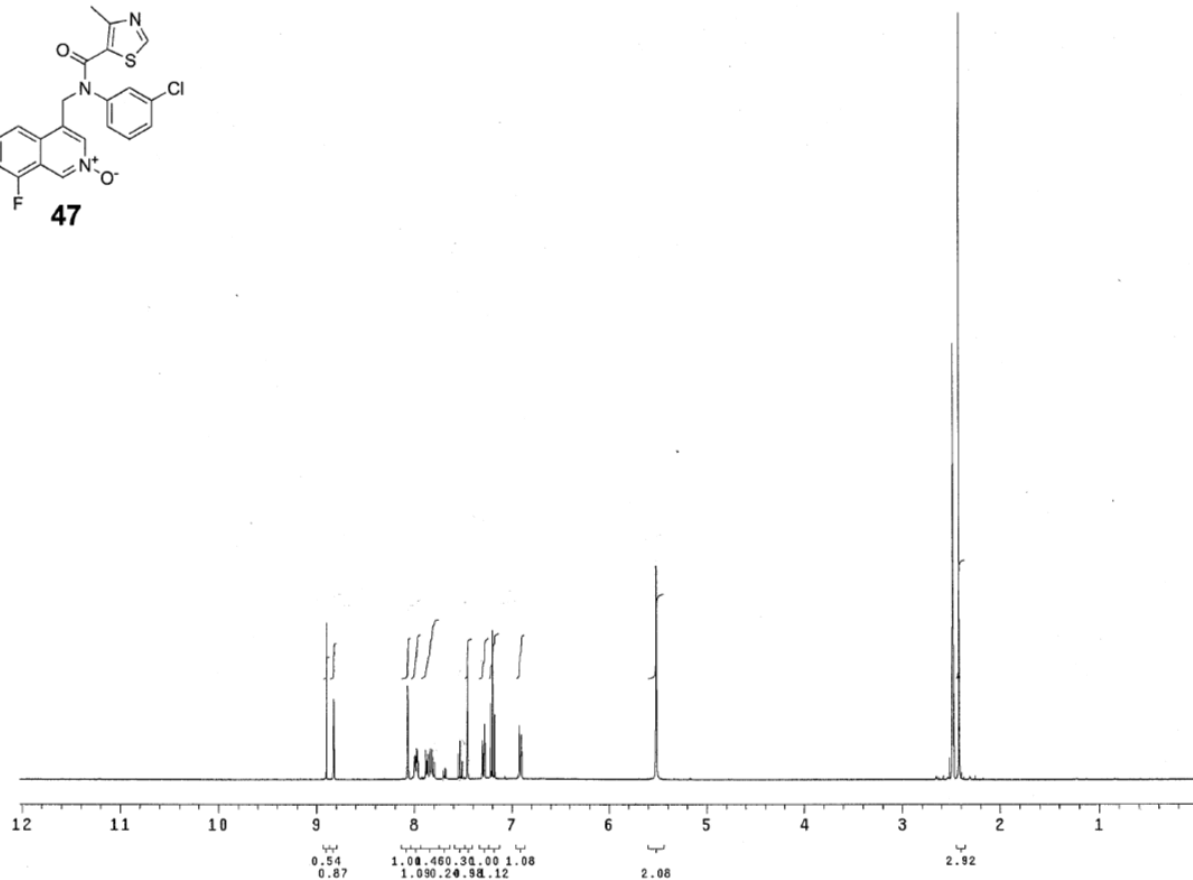

=====  
Injection Date : 9/17/2008 11:09:58 AM Seq. Line : 6  
Sample Name : Klyps31222 Location : Vial 19  
Acq. Operator : 1 Inj : 1  
Acq. Instrument : Kalypsys Inj Volume : 5 µl  
Sequence File : C:\CHEM32\1\SEQUENCE\DEF LC2.S  
Method : C:\CHEM32\1\METHODS\1-95 LC.M  
Last changed : 9/17/2008 9:43:27 AM by 1  
1%-95% AcCN in H2O, .05%TFA  
DAD1 B, Sig=254,16 Ref=360,100 (019-0601.D)

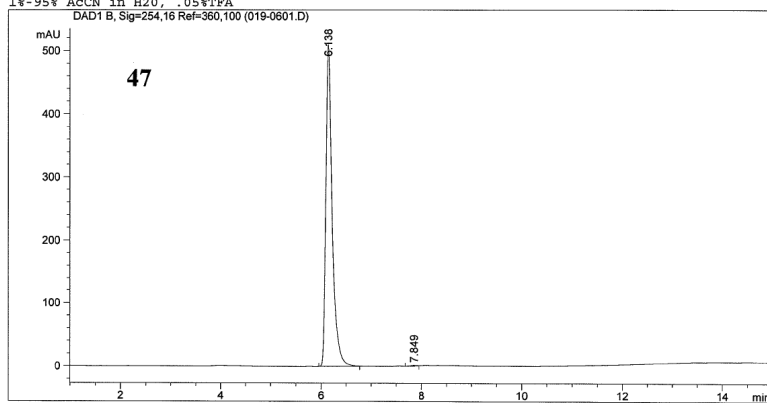

=====  
Area Percent Report  
=====

Sorted By : Signal  
Multiplier : 1.0000  
Dilution : 1.0000  
Use Multiplier & Dilution Factor with ISTDs

Signal 1: DAD1 B, Sig=254,16 Ref=360,100

| Peak # | RetTime [min] | Type | Width [min] | Area [mAU*s] | Height [mAU] | Area %  |
|--------|---------------|------|-------------|--------------|--------------|---------|
| 1      | 6.138         | BB   | 0.1322      | 4564.39355   | 510.85843    | 99.7648 |
| 2      | 7.849         | BV   | 0.1494      | 10.76014     | 1.12715      | 0.2352  |

Totals : 4575.15370 511.98558

| Compound # | MF             | MW       | ESI+<br>Exact<br>m/z | ESI+<br>Measured<br>m/z | ESI+<br>Mass<br>Defect<br>(ppm) | ESI-<br>Exact<br>m/z | ESI-<br>Measured<br>m/z | ESI- Mass<br>Defect<br>(ppm) |
|------------|----------------|----------|----------------------|-------------------------|---------------------------------|----------------------|-------------------------|------------------------------|
| 7          | C21H16N2O3     | 344.1161 | 345.1239             | 345.1239                | 0.00                            | 343.1083             | 343.1085                | 0.58                         |
| 8          | C21H15N2O3F    | 362.1067 | 363.1145             | 363.1141                | -1.10                           | 361.0989             | 361.0985                | -1.11                        |
| 9          | C21H17N3O2S    | 375.1041 | 376.1119             | 376.1121                | 0.53                            | 374.0963             | 374.0959                | -1.07                        |
| 10         | C21H16N3O2FS   | 393.0947 | 394.1025             | 394.1026                | 0.25                            | 392.0869             | 392.0870                | 0.26                         |
| 11         | C21H15N3O2FSCl | 427.0558 | 428.0636             | 428.0641                | 1.17                            | 426.0480             |                         |                              |
| 12         | C21H15N3O2FSCl | 427.0558 | 428.0636             | 428.0641                | 1.17                            | 426.0480             | 426.0486                | 1.41                         |
| 13         | C21H15N3O2FSCl | 427.0558 | 428.0636             |                         |                                 | 426.0480             | 426.0478                | -0.47                        |
| 14         | C21H15N3O2F2S  | 411.0853 | 412.0931             | 412.0923                | -1.94                           | 410.0775             | 410.0771                | -0.98                        |
| 15         | C22H15N4O2FS   | 418.09   | 419.0978             | 419.0971                | -1.67                           | 417.0822             | 417.0821                | -0.24                        |
| 16         | C22H18N3O2FS   | 407.1104 | 408.1182             | 408.1176                | -1.47                           | 406.1026             | 406.1027                | 0.25                         |
| 17         | C22H18N3O3FS   | 423.1053 | 424.1131             | 424.1125                | -1.41                           | 422.0975             | 422.0974                | -0.24                        |
| 18         | C20H13N3O2FSCl | 413.0401 | 414.0479             | 414.0472                | -1.69                           | 412.0323             | 412.0323                | 0.00                         |
| 19         | C23H17N3O2FCl  | 421.0993 | 422.1071             |                         |                                 | 420.0915             | 420.0919                | 0.95                         |
| 20         | C23H17N3O2FCl  | 421.0993 | 422.1071             |                         |                                 | 420.0915             | 420.0915                | 0.00                         |
| 21         | C23H17N3O2FCl  | 421.0993 | 422.1071             |                         |                                 | 420.0915             | 420.0919                | 0.95                         |
| 22         | C23H17N3O2FCl  | 421.0993 | 422.1071             |                         |                                 | 420.0915             | 420.0919                | 0.95                         |
| 23         | C21H16N4O2FCl  | 410.0946 | 411.1024             | 411.1019                | -1.22                           | 409.0868             | 409.0863                | -1.22                        |
| 24         | C22H17N3O3FCl  | 425.0942 | 426.1020             | 426.1028                | 1.88                            | 424.0864             | 424.0865                | 0.24                         |
| 25         | C22H20N2O2FCl  | 398.1197 | 399.1275             | 399.1274                | -0.25                           | 397.1119             | 397.1122                | 0.76                         |
| 26         | C20H18N2O2FCl  | 372.1041 | 373.1119             | 373.1118                | -0.27                           | 371.0963             | 371.0957                | -1.62                        |

|           |                 |          |          |          |       |          |          |       |
|-----------|-----------------|----------|----------|----------|-------|----------|----------|-------|
| <b>27</b> | C17H14N3O2SCI   | 359.0495 | 360.0573 | 360.0576 | 0.83  | 358.0417 | 358.0417 | 0.00  |
| <b>28</b> | C21H20N3O2SCI   | 413.0965 | 414.1043 | 414.1046 | 0.72  | 412.0887 | 412.0889 | 0.49  |
| <b>29</b> | C21H14N2O3FSCI  | 428.0398 | 429.0476 | 429.0470 | -1.40 | 427.0320 | 427.0321 | 0.23  |
| <b>30</b> | C22H17N3O2FSCI  | 441.0714 | 442.0792 | 442.0785 | -1.58 | 440.0636 | 440.0640 | 0.91  |
| <b>31</b> | C22H17N3O2FSCI  | 441.0714 | 442.0792 | 442.0789 | -0.68 | 440.0636 |          |       |
| <b>32</b> | C21H15N3OFSCI   | 411.0608 | 412.0686 | 412.0681 | -1.21 | 410.0530 | 410.0533 | 0.73  |
| <b>33</b> | C21H15N3OFSCI   | 411.0608 | 412.0686 | 412.0682 | -0.97 | 410.0530 |          |       |
| <b>34</b> | C21H15N3O2FSCI  | 427.0558 | 428.0636 | 428.0644 | 1.87  | 426.0480 | 426.0486 | 1.41  |
| <b>35</b> | C21H16N3O2SCI   | 409.0652 | 410.0730 | 410.0733 | 0.73  | 408.0574 | 408.0568 | -1.47 |
| <b>36</b> | C21H15N3O2SCI2  | 443.0262 | 444.0340 |          |       | 442.0184 | 442.0186 | 0.45  |
| <b>37</b> | C21H15N3O2FSCI  | 427.0558 | 428.0636 | 428.0641 | 1.17  | 426.0480 | 426.0482 | 0.47  |
| <b>38</b> | C21H15N3O2FSCI  | 427.0558 | 428.0636 | 428.0628 | -1.87 | 426.0480 | 426.0472 | -1.88 |
| <b>39</b> | C21H15N3O2FSCI  | 427.0558 | 428.0636 |          |       | 426.0480 | 426.0487 | 1.64  |
| <b>40</b> | C21H14N3O2F2SCI | 445.0463 | 446.0541 | 446.0537 | -0.90 | 444.0385 | 444.0381 | -0.90 |
| <b>41</b> | C23H16N3O2F2CI  | 439.0899 | 440.0977 | 440.0974 | -0.68 | 438.0821 | 438.0820 | -0.23 |
| <b>42</b> | C21H15N4O2F2CI  | 428.0852 | 429.0930 | 429.0922 | -1.86 | 427.0774 | 427.0773 | -0.23 |
| <b>43</b> | C22H16N3O3F2CI  | 443.0848 | 444.0926 |          |       | 442.0770 | 442.0767 | -0.68 |
| <b>44</b> | C21H14N3O2F2SCI | 445.0463 | 446.0541 |          |       | 444.0385 | 444.0380 | -1.13 |
| <b>45</b> | C21H13N2O3F2SCI | 446.0303 | 447.0381 | 447.0375 | -1.34 | 445.0225 | 445.0220 | -1.12 |
| <b>46</b> | C21H14N3OF2SCI  | 429.0514 | 430.0592 | 430.0585 | -1.63 | 428.0436 |          |       |
| <b>47</b> | C21H14N3O2F2SCI | 445.0463 | 446.0541 | 446.0542 | 0.22  | 444.0385 | 444.0382 | -0.68 |

Table 1. Crystal data and structure refinement for Cpd 12.

|                                   |                                                                      |                            |
|-----------------------------------|----------------------------------------------------------------------|----------------------------|
| Identification code               | Cpd 12                                                               |                            |
| Empirical formula                 | C <sub>21</sub> H <sub>15</sub> Cl F N <sub>3</sub> O <sub>2</sub> S |                            |
| Formula weight                    | 427.87                                                               |                            |
| Temperature                       | 100(2) K                                                             |                            |
| Wavelength                        | 0.71073 Å                                                            |                            |
| Crystal system                    | Triclinic                                                            |                            |
| Space group                       | P-1                                                                  |                            |
| Unit cell dimensions              | a = 8.8921(13) Å                                                     | $\alpha = 72.680(2)^\circ$ |
|                                   | b = 17.982(3) Å                                                      | $\beta = 82.543(2)^\circ$  |
|                                   | c = 18.935(3) Å                                                      | $\gamma = 77.465(2)^\circ$ |
| Volume                            | 2814.5(7) Å <sup>3</sup>                                             |                            |
| Z                                 | 6                                                                    |                            |
| Density (calculated)              | 1.515 g/cm <sup>3</sup>                                              |                            |
| Absorption coefficient            | 0.349 mm <sup>-1</sup>                                               |                            |
| F(000)                            | 1320                                                                 |                            |
| Crystal size                      | 0.22 x 0.08 x 0.04 mm <sup>3</sup>                                   |                            |
| Theta range for data collection   | 1.87 to 25.00°                                                       |                            |
| Index ranges                      | -10 ≤ h ≤ 9, -21 ≤ k ≤ 21, -22 ≤ l ≤ 22                              |                            |
| Reflections collected             | 16620                                                                |                            |
| Independent reflections           | 9455 [R(int) = 0.0512]                                               |                            |
| Completeness to theta = 25.00°    | 98.2 %                                                               |                            |
| Absorption correction             | None                                                                 |                            |
| Max. and min. transmission        | 0.9862 and 0.9272                                                    |                            |
| Refinement method                 | Full-matrix least-squares on F <sup>2</sup>                          |                            |
| Data / restraints / parameters    | 9455 / 0 / 794                                                       |                            |
| Goodness-of-fit on F <sup>2</sup> | 1.011                                                                |                            |
| Final R indices [I > 2σ(I)]       | R1 = 0.0584, wR2 = 0.1363                                            |                            |
| R indices (all data)              | R1 = 0.1099, wR2 = 0.1593                                            |                            |
| Largest diff. peak and hole       | 0.837 and -0.406 e Å <sup>-3</sup>                                   |                            |

Table 2. Atomic coordinates ( $\times 10^4$ ) and equivalent isotropic displacement parameters ( $\text{\AA}^2 \times 10^3$ ) for Cpd 12.  $U(\text{eq})$  is defined as one third of the trace of the orthogonalized  $U^{\text{ij}}$  tensor.

|         | x        | y        | z        | $U(\text{eq})$ |
|---------|----------|----------|----------|----------------|
| Cl(1'') | 15733(1) | 1875(1)  | -4548(1) | 40(1)          |
| Cl(1')  | 7275(2)  | 129(1)   | 4646(1)  | 34(1)          |
| Cl(2')  | 7634(6)  | 2718(3)  | 2227(3)  | 38(2)          |
| Cl(1)   | -591(1)  | 6491(1)  | 2212(1)  | 40(1)          |
| F(1'')  | 9436(3)  | -1324(1) | 724(1)   | 32(1)          |
| F(1')   | 3760(3)  | 2140(1)  | -858(1)  | 34(1)          |
| F(1)    | 7590(3)  | 4120(1)  | -774(1)  | 34(1)          |
| S(1')   | 3114(1)  | 2472(1)  | 4075(1)  | 30(1)          |
| S(1'')  | 9455(2)  | 1661(1)  | -5145(1) | 39(1)          |
| S(1)    | 3886(1)  | 5846(1)  | 4048(1)  | 33(1)          |
| O(1')   | 6577(3)  | -148(2)  | 825(2)   | 31(1)          |
| O(1'')  | 6706(3)  | 967(2)   | -1006(1) | 29(1)          |
| O(1)    | 9523(3)  | 5310(2)  | 791(2)   | 29(1)          |
| O(2')   | 424(4)   | 2050(2)  | 2883(2)  | 36(1)          |
| O(2'')  | 9226(4)  | 459(2)   | -3675(2) | 45(1)          |
| O(2)    | 6936(4)  | 4254(2)  | 3388(2)  | 35(1)          |
| N(1'')  | 8461(4)  | -126(2)  | -492(2)  | 24(1)          |
| N(1')   | 4837(4)  | 966(2)   | 345(2)   | 26(1)          |
| N(1)    | 8103(4)  | 4660(2)  | 349(2)   | 25(1)          |
| N(2')   | 1854(4)  | 3907(2)  | 3441(2)  | 30(1)          |
| N(2'')  | 9220(4)  | 3036(2)  | -4959(2) | 39(1)          |
| N(2)    | 6244(5)  | 5937(2)  | 4643(2)  | 34(1)          |
| N(3')   | 2974(4)  | 1470(2)  | 2834(2)  | 26(1)          |
| N(3'')  | 10935(4) | 833(2)   | -3131(2) | 24(1)          |
| N(3)    | 4964(4)  | 5036(2)  | 2717(2)  | 25(1)          |
| C(1'')  | 10276(5) | -1303(2) | 66(2)    | 25(1)          |
| C(1')   | 2995(5)  | 2140(3)  | -188(2)  | 29(1)          |
| C(1)    | 6562(5)  | 4034(2)  | -174(2)  | 26(1)          |
| C(2'')  | 11541(5) | -1881(2) | 35(2)    | 28(1)          |
| C(2')   | 1719(5)  | 2719(3)  | -144(2)  | 29(1)          |
| C(2)    | 5325(5)  | 3698(2)  | -159(2)  | 26(1)          |
| C(3'')  | 12379(5) | -1847(3) | -650(2)  | 29(1)          |
| C(3')   | 961(5)   | 2698(3)  | 559(2)   | 33(1)          |

|         |          |          |          |       |
|---------|----------|----------|----------|-------|
| C(3)    | 4282(5)  | 3622(2)  | 474(2)   | 30(1) |
| C(4')   | 1498(5)  | 2123(3)  | 1178(2)  | 30(1) |
| C(4'')  | 11930(5) | -1245(2) | -1266(2) | 26(1) |
| C(4)    | 4521(5)  | 3888(2)  | 1049(2)  | 28(1) |
| C(5'')  | 10625(5) | -650(2)  | -1226(2) | 22(1) |
| C(5')   | 2810(5)  | 1534(2)  | 1129(2)  | 27(1) |
| C(5)    | 5795(5)  | 4238(2)  | 1031(2)  | 22(1) |
| C(6'')  | 10120(5) | 16(2)    | -1855(2) | 23(1) |
| C(6')   | 3437(5)  | 904(2)   | 1762(2)  | 25(1) |
| C(6)    | 6080(5)  | 4559(2)  | 1608(2)  | 21(1) |
| C(7'')  | 8844(5)  | 548(2)   | -1781(2) | 25(1) |
| C(7')   | 4654(5)  | 350(2)   | 1648(2)  | 27(1) |
| C(7)    | 7293(5)  | 4926(2)  | 1517(2)  | 26(1) |
| C(8'')  | 7916(5)  | 491(2)   | -1087(2) | 24(1) |
| C(8')   | 5446(5)  | 358(3)   | 924(2)   | 26(1) |
| C(8)    | 8385(5)  | 4987(2)  | 873(2)   | 25(1) |
| C(9')   | 3564(5)  | 1548(2)  | 425(2)   | 26(1) |
| C(9'')  | 9776(5)  | -686(2)  | -549(2)  | 22(1) |
| C(9)    | 6840(5)  | 4314(2)  | 401(2)   | 22(1) |
| C(10')  | 2676(5)  | 846(3)   | 2537(2)  | 30(1) |
| C(10'') | 11106(5) | 52(2)    | -2575(2) | 28(1) |
| C(10)   | 5035(5)  | 4446(2)  | 2316(2)  | 26(1) |
| C(11')  | 4521(5)  | 1425(3)  | 3012(2)  | 26(1) |
| C(11'') | 12176(5) | 1247(2)  | -3168(2) | 27(1) |
| C(11)   | 3925(5)  | 5780(2)  | 2462(2)  | 25(1) |
| C(12'') | 13188(5) | 1383(2)  | -3789(2) | 27(1) |
| C(12')  | 5101(5)  | 839(3)   | 3637(2)  | 30(1) |
| C(12)   | 2356(5)  | 5774(3)  | 2486(2)  | 25(1) |
| C(13'') | 14414(5) | 1737(3)  | -3775(2) | 28(1) |
| C(13')  | 6532(5)  | 845(2)   | 3848(2)  | 29(1) |
| C(13)   | 1365(5)  | 6485(3)  | 2209(2)  | 28(1) |
| C(14')  | 7372(5)  | 1418(3)  | 3448(2)  | 34(1) |
| C(14'') | 14675(5) | 1947(3)  | -3162(2) | 34(1) |
| C(14)   | 1908(6)  | 7192(3)  | 1938(2)  | 33(1) |
| C(15'') | 13661(6) | 1790(3)  | -2539(2) | 36(1) |
| C(15')  | 6806(5)  | 1988(3)  | 2819(2)  | 32(1) |
| C(15)   | 3452(5)  | 7193(3)  | 1922(2)  | 32(1) |
| C(16'') | 12420(5) | 1442(3)  | -2535(2) | 31(1) |



|        |         |         |          |       |
|--------|---------|---------|----------|-------|
| C(16') | 5371(5) | 1990(3) | 2599(2)  | 30(1) |
| C(16)  | 4486(5) | 6476(3) | 2175(2)  | 29(1) |
| C(17") | 9987(5) | 962(3)  | -3686(2) | 31(1) |
| C(17') | 1766(5) | 2028(3) | 3004(2)  | 29(1) |
| C(17)  | 5924(5) | 4855(3) | 3277(2)  | 27(1) |
| C(18") | 9828(5) | 1717(3) | -4287(2) | 30(1) |
| C(18') | 2118(5) | 2643(2) | 3306(2)  | 24(1) |
| C(18)  | 5692(5) | 5387(2) | 3770(2)  | 27(1) |
| C(19') | 2660(5) | 3473(3) | 3998(2)  | 30(1) |
| C(19") | 9106(5) | 2669(3) | -5440(2) | 39(1) |
| C(19)  | 4747(6) | 6133(3) | 4647(2)  | 37(1) |
| C(20') | 1530(5) | 3436(3) | 3043(2)  | 27(1) |
| C(20") | 9648(5) | 2491(3) | -4288(2) | 35(1) |
| C(20)  | 6805(5) | 5482(2) | 4153(2)  | 31(1) |
| C(21') | 557(5)  | 3831(3) | 2401(2)  | 36(1) |
| C(21") | 9882(6) | 2804(3) | -3679(2) | 42(1) |
| C(21)  | 8487(5) | 5150(3) | 4110(3)  | 40(1) |

---

- 
- <sup>i</sup> Isler, O.; Gutmann, H.; Straub, O.; Fust, B.; Bohni, E.; Studer, A. Chemotherapy of experimental tuberculosis. II. Isonicotinic acid hydrazides substituted in the nucleus, *Helv. Chim. Acta.*, **1955**, 38, 1033-1046.
- <sup>ii</sup> Quin, L. D.; Russell, J. W.; Prince, R. D.; Shook, H. E. Double-bond migration in 1-methyl-4-(carbethoxymethylene)phosphorinane. *J. Org. Chem.* **1971**, 36 (11), 1495-1499.
- <sup>iii</sup> Li, H.-Y.; McMillen, W. T.; Heap, C. R.; McCann, D. J.; Yan, L.; Campbell, R. M.; Mundla, S. R.; King, C.-H. R.; Dierks, E. A.; Anderson, B. D.; Britt, K. S.; Huss, K. L.; Voss, M. D.; Wang, Y.; Clawson, D. K.; Yingling, J. M.; Sawyer, J. S. Optimization of a dihydropyrrolopyrazole series of transforming growth factor- $\beta$  type I receptor kinase domain inhibitors: discovery of an orally bioavailable transforming growth factor- $\beta$  receptor type I inhibitor as antitumor agent. *J. Med. Chem.* **2008**, 51(7), 2302-2306.
